# Supplementary material
Source: PubMed Central journal article supplement (PMC3271175)
Supplement: NIHMS351214-supplement-1_si_001.pdf [file NIHMS351214-supplement-1_si_001.pdf]

## SUPPORTING INFORMATION

# Observation, Prediction, and Origin of an Isotope Effect on Recrossing. Entropic Intermediates and Hidden Rate-Limiting Steps in Seemingly Concerted Cycloadditions

Ollie M. Gonzalez-James, Eugene E. Kwan, and Daniel A. Singleton\*

*Department of Chemistry, Texas A&M University, PO Box 30012,  
College Station, Texas 77842*

[singleton@mail.chem.tamu.edu](mailto:singleton@mail.chem.tamu.edu)

|                                                                                                 |    |
|-------------------------------------------------------------------------------------------------|----|
| Experimental Procedures .....                                                                   | 2  |
| Reaction Procedures.....                                                                        | 2  |
| NMR Measurements .....                                                                          | 3  |
| NMR Results and Calculation of KIEs .....                                                       | 3  |
| Computational Procedures and Supporting Computational Results .....                             | 4  |
| General .....                                                                                   | 4  |
| GAUSSRATE Calculations .....                                                                    | 5  |
| Exploration of DFT and ab initio Methods.....                                                   | 5  |
| Initialization of Trajectories and Additional Details on Trajectories .....                     | 6  |
| Uncertainties in the Trajectory Ratios, and Extrapolation of the Trajectory-Predicted KIE ..... | 9  |
| The Canonical Variational TS near 5 <sup>‡</sup> . Geometry and Discussion .....                | 10 |
| The Second Variational TS / Dynamical Bottleneck .....                                          | 11 |
| Microcanonical Variational Prediction of the KIE .....                                          | 12 |
| On the Nature of 6 <sup>‡</sup> , and Trajectory Studies .....                                  | 22 |
| Calculated Structures and Energies .....                                                        | 24 |
| Transition Structures for the reaction of 1 with 2.....                                         | 24 |
| HF/3-21G .....                                                                                  | 24 |
| HF/6-31+G** .....                                                                               | 25 |
| HF/6-31+G** pcm(THF).....                                                                       | 25 |
| B3LYP/6-31+G* .....                                                                             | 26 |
| B3LYP/6-31+G* pcm(THF).....                                                                     | 26 |
| MPW1K/6-31+G** .....                                                                            | 27 |
| MPW1K/6-31G* (with grid=ultrafine).....                                                         | 28 |
| m05/6-31+G** .....                                                                              | 28 |
| m052x/6-31+G** .....                                                                            | 29 |
| m06/6-31+G** .....                                                                              | 30 |
| m062x/6-31+G** .....                                                                            | 30 |
| m062x/6-31+G** pcm(THF) first saddle point .....                                                | 31 |
| m062x/6-31+G** pcm(THF) second saddle point .....                                               | 32 |
| m062x/6-31+G** pcm(THF) intermediate.....                                                       | 32 |
| MP2/6-31+G** .....                                                                              | 33 |
| mpwlyp/6-31+G** .....                                                                           | 34 |
| VRI for the reaction of 1 with 2.....                                                           | 34 |

|                                                                       |    |
|-----------------------------------------------------------------------|----|
| Structure 6 <sup>‡</sup> .....                                        | 35 |
| Cyclobutanone Product 3 / 3' .....                                    | 36 |
| Cis-2-butene (1) Starting Material .....                              | 36 |
| Dichloroketene (2) Starting Material .....                            | 37 |
| Starting Material Complex Used for RRKM Calculations on 1 + 2.....    | 37 |
| Transition Structures for the Reaction of 7 with Cyclopentadiene..... | 38 |
| Structure: E_a1_endo.....                                             | 38 |
| Structure: E_a1_exo.....                                              | 40 |
| Structure: E_a2_endo.....                                             | 41 |
| Structure: E_a2_exo.....                                              | 43 |
| Structure: E_c1_endo.....                                             | 44 |
| Structure: E_c1_exo.....                                              | 46 |
| Structure: E_c2_endo.....                                             | 47 |
| Structure: E_c2_exo.....                                              | 49 |
| Structure: Z_a1_exo.....                                              | 52 |
| Structure: Z_a2_endo.....                                             | 53 |
| Structure: Z_a2_exo.....                                              | 55 |
| Structure: Z_b2_endo.....                                             | 56 |
| Structure: Z_b2_exo.....                                              | 58 |
| Structure: Z_c2_endo.....                                             | 59 |
| Structure: Z_c2_exo.....                                              | 61 |
| Listing of Subprograms for Program Suite PROGDYN.....                 | 62 |
| Program proganal.....                                                 | 64 |
| progdyn.conf .....                                                    | 66 |
| Sample Input Files .....                                              | 68 |
| Gaussrate.....                                                        | 68 |
| p.dat.....                                                            | 68 |
| p.70.....                                                             | 76 |
| p.71.....                                                             | 77 |
| p.73.....                                                             | 78 |
| p.75.....                                                             | 80 |
| RRKM Sample Input File .....                                          | 82 |
| dapt10.....                                                           | 82 |
| References, and Complete Reference 17b: .....                         | 83 |

## Experimental Procedures

Oven-dried glassware was cooled under a stream of nitrogen prior to use, and reactions were carried out under a positive pressure of nitrogen. Standard syringe-and-septa techniques were employed. THF was dried by distilling from benzophenone / sodium prior to use.

### Reaction Procedures

*cis*-2,2-Dichloro-3,4-dimethylcyclobutanone (**3**). Example Procedure. To 100 mL of dry tetrahydrofuran (THF) at 25 °C in a flask equipped with a dry ice / acetone condenser was added 5 g (76 mmol) of activated zinc-copper complex. While stirring the solution, approximately 3.4 g (60 mmol) of *cis*-2-butene was added to the reaction mixture using a balloon. Using an addition

funnel, 7 mL (11.3 g, 62 mmol) of trichloroacetyl chloride in 100 mL of THF was added to the solution over a 4 h period while the temperature was maintained at 25 °C. The reaction was allowed to stir at 25 °C for an additional 16 h. Aliquots of 0.5 mL of the reaction mixture were analyzed directly by  $^1\text{H}$  NMR to insure completion of the reaction. The reaction mixture was then filtered through celite, and 200 mL of pentane was added to precipitate salts from the solution. The resulting solution was filtered and the filtrate was concentrated under reduced pressure. The residue was mixed with 50 mL of pentane, the resulting mixture was filtered, and the filtrate was again concentrated under reduced pressure. The residue was rapidly chromatographed through a 3 inch x 2 inch plug of silica gel, eluting with 1% ethyl acetate in hexanes. Concentration of the eluted material under vacuum was followed by two successive vacuum distillations to afford 600 mg of **3** as a clear viscous oil with no observable impurities in the  $^1\text{H}$  NMR: bp 35 - 45 °C (0.1 mm). Closely analogous procedures were used to obtain two additional samples of **3** for analysis.

### NMR Measurements

All NMR samples consisted of 200 mg of **3** in 5 mm NMR tubes filled to a constant height of 5 cm with  $\text{CDCl}_3$ . The  $^{13}\text{C}$  spectra were recorded at 125.81 MHz using inverse gated decoupling, 160 s delays between calibrated  $\pi/2$  pulses, and a 5 s acquisition time to collect 347 224 points. Integrations were numerically determined using a constant integration region for each peak that was a constant multiple of the peak widths at half height. In accord with the methodology we have previously published (ref 7a in main text), for the integration of the methine carbons the transmitter was set half way in between the two carbons. A zero-order baseline correction was generally applied, but to avoid any qualitative manipulation no first-order or higher-order baseline correction was ever applied. Six spectra were recorded for each sample.

The assignment of the peaks in the  $^{13}\text{C}$  spectrum of **3** was based on mapping the  $^{13}\text{C}$ - $^{13}\text{C}$  coupling constants that could be observed in the very high signal-to-noise  $^{13}\text{C}$  spectra of **3**. The coupling constants in Hz were  $J(1,2)=30.6$ ,  $J(1,3)=33.6$ ,  $J(2,4)=31.7$ ,  $J(2,3)=20$ ,  $J(3,4)=29.7$ ,  $J(3,6)=35.5$ ,  $J(4,5)=36.8$ . The unusual two-bond coupling between carbons 2 and 3 or 20 Hz should be noted and it affects the analysis as described below.

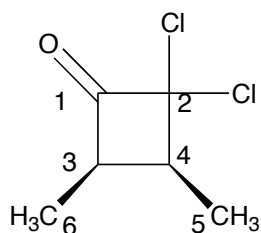

### NMR Results and Calculation of KIEs

For the integrations of the peaks for carbon 3 versus carbon 4, the integration of carbon 4 was set to 1000 and the integration of carbon 3 was recorded. For the integrations of the peaks for carbon 5 versus carbon 6, the integration of carbon 6 was set to 1000 and the integration of carbon 5 was recorded. The raw results are shown in the first section of the tables below.

A complication in the raw results for carbon 3 versus carbon 4 is that carbon 4 is subject to three  $^{13}\text{C}$ - $^{13}\text{C}$  couplings leading to satellites not included in the integration range, while carbon 3 is subject to four such couplings (due to the 20 Hz C2-C4 coupling discussed above). As a result, the integration of carbon 3 is diminished by the natural abundance of  $^{13}\text{C}$  at carbon 2. To

allow for this, the integrations at carbon 3 were adjusted by the 0.0107(8) natural abundance of  $^{13}\text{C}$ . The second section of the first table below shows the adjusted results.

The isotope effects were then calculated as 1000 divided by the integration, the results were averaged, and 95% confidence ranges were calculated in a standard way. (See: [http://www.iupac.org/publications/analytical\\_compendium/Cha02sec3.pdf](http://www.iupac.org/publications/analytical_compendium/Cha02sec3.pdf).)

Table of Results for Carbon 3 versus Carbon 4

| Raw Integration Results |                    |        |                |        |        |
|-------------------------|--------------------|--------|----------------|--------|--------|
| 992.2                   | 992.7              | 998.2  | 998.1          | 996.4  | 998.1  |
| 992.4                   | 991.8              | 996.0  | 998.9          | 995.9  | 1000.5 |
| 992.9                   | 996.1              | 997.9  | 1000.1         | 992.0  | 995.7  |
| 991.9                   | 997.5              | 995.6  | 997.6          | 997.2  | 997.9  |
| Adjusted for Satellites |                    |        |                |        |        |
| 1002.9                  | 1003.3             | 1008.9 | 1008.8         | 1007.1 | 1008.8 |
| 1003.0                  | 1002.4             | 1006.7 | 1009.5         | 1006.6 | 1011.2 |
| 1003.5                  | 1006.7             | 1008.6 | 1010.8         | 1002.6 | 1006.4 |
| 1002.5                  | 1008.1             | 1006.2 | 1008.3         | 1007.8 | 1008.6 |
| Isotope Effect          |                    |        |                |        |        |
| 0.9971                  | 0.9967             | 0.9912 | 0.9913         | 0.9930 | 0.9913 |
| 0.9970                  | 0.9976             | 0.9934 | 0.9906         | 0.9934 | 0.9889 |
| 0.9965                  | 0.9933             | 0.9915 | 0.9893         | 0.9974 | 0.9936 |
| 0.9975                  | 0.9919             | 0.9938 | 0.9918         | 0.9922 | 0.9915 |
| average                 | standard deviation |        | 95% confidence |        |        |
| 0.993                   | 0.0027             |        | 0.0012         |        |        |

Table of Results for Carbon 5 versus Carbon 6

|         |                    |        |                |        |        |
|---------|--------------------|--------|----------------|--------|--------|
| 1003.8  | 1003.6             | 1001.3 | 1002.1         | 999.3  | 990.1  |
| 1004.7  | 1005.2             | 999.3  | 999.8          | 1001.1 | 995.6  |
| 1003.6  | 1001.1             | 1000.9 | 997.3          | 995.8  | 999.5  |
| 1003.3  | 1001.7             | 1000.2 | 1001.0         | 996.4  | 994.2  |
| 0.9962  | 0.9964             | 0.9987 | 0.9979         | 1.0007 | 1.0100 |
| 0.9953  | 0.9948             | 1.0007 | 1.0002         | 0.9989 | 1.0045 |
| 0.9964  | 0.9989             | 0.9991 | 1.0027         | 1.0042 | 1.0005 |
| 0.9967  | 0.9983             | 0.9998 | 0.9990         | 1.0037 | 1.0058 |
| average | standard deviation |        | 95% confidence |        |        |
| 1.0000  | 0.0036             |        | 0.0015         |        |        |

## Computational Procedures and Supporting Computational Results

### General

Calculations of structures, energies, and frequencies employed standard procedures in Gaussian09 (S1) unless otherwise noted. Most structures were optimized with tight convergence criteria (opt=tight in Gaussian09) instead of the default criteria. Complete structures and energetics are provided in a section below.

The program suite PROGDYN used for dynamics is a series of component programs as either Unix shell scripts or awk programs. Gaussian09 was used to calculate the forces at each point in trajectories. A full description of PROGDYN including either listings or the

subprograms used or references to the exact subprograms used can be found at the end of the Supporting Information. The latest version of this program can be obtained by emailing Daniel Singleton at [singleton@mail.chem.tamu.edu](mailto:singleton@mail.chem.tamu.edu). The original version of this program was published in the Supporting Information of a previous paper (S2).

RRKM calculations were carried out using an available program (S3) and employing the Beyer-Swinehart direct count algorithm (S4). An example input file showing all of the options employed is shown in a later section.

### GAUSSRATE Calculations

A number of the calculations in the manuscript made use of the programs GAUSSRATE (reference 17a in the main text) and POLYRATE (reference 17b in the main text, see the last section for the complete reference) (S5). These programs were modified in minor ways. In particular, the subroutine *mepout* was modified to output frequencies with higher precision, and the utility program *shuttle* was modified to save copies of all frequency calculations so that data could be extracted from them later. Simple *awk* programs were used to automate the use of data output from GAUSSRATE in subsequent RRKM calculations.

To show the complete set of options selected for these calculations, a sample set of input files for GAUSSRATE / POLYRATE are given in a later section. For the sake of simplicity, the starting material in these calculations was generally taken to be a minimized loose complex of reactants. Such complexes are not kinetically significant but this does not matter for the purpose at hand.

### Exploration of DFT and ab initio Methods

A variety of computational method / basis set combinations were explored for the study of the reaction of **1** with **2**. In general terms, we considered whether the energy surfaces predicted by these method / basis set combinations were consistent with the experimentally observed intramolecular KIE and consistent with CCSD(T)/6-311++G\*\*/PCM(CH<sub>2</sub>Cl<sub>2</sub>) single-point energies on a grid of M06-2X/6-31+G\*\* geometries. Some were consistent with both while some were consistent with neither.

For the various transition structures, conventional TST isotope effects were predicted by the method of Bigeleisen and Mayer (S6). A one-dimensional infinite parabola tunneling correction was also applied (S7). Such KIE predictions have proven highly accurate in reactions not involving hydrogen transfer, so long as the calculation accurately depicts the mechanism and transition state geometry (S8).

For the intramolecular KIE, surfaces for which the transition structure has C<sub>s</sub>-symmetry provide no prediction from conventional transition state theory. As explored in detail for the main text with MPW1K/6-31+G\*\* calculations, such structures can be consistent with the experimental isotope effects. This includes M06/6-31+G\*\*, MP2/6-31+G\*\*, MPW1K/6-31+G\*\*, MPW1K/6-31+G\*\*/PCM(CH<sub>2</sub>Cl<sub>2</sub>), and MPW1K/6-31G\* surfaces. Other surfaces lead to asymmetric transition structures with isotope effects that are clearly inconsistent with experiment – the predicted isotope effects for HF/6-31+G\*, HF/6-31+G\*/PCM(CH<sub>2</sub>Cl<sub>2</sub>), B3LYP/6-31+G\*\*, B3LYP/6-31+G\*\*/PCM(CH<sub>2</sub>Cl<sub>2</sub>), and MPW3LYP/6-31+G\*\* transition structures were 1.001, 1.016, 1.019, 1.014, and 1.018, respectively. For a third class of structures, it is not obvious that the structures are inconsistent with the observed KIE due to the complexity of the energy surface. On the M062X/6-31+G\*\*/PCM(CH<sub>2</sub>Cl<sub>2</sub>) there is an early

slightly asymmetric transition structure that leads to an asymmetric intermediate that leads to a highly unsymmetrical rate-limiting transition structure. The isotope effect predicted for this reaction from conventional TST is 1.001, but it seems plausible that a likely later variational transition state could lead to isotope effects nearer that observed. However, the M06-2X surfaces did not fit well with the CCSD(T)/6-311++G\*\*/PCM(CH<sub>2</sub>Cl<sub>2</sub>) surface and so they were not considered further.

The table below shows the grid of CCSD(T)/6-311++G\*\*/PCM(CH<sub>2</sub>Cl<sub>2</sub>) single-point energies on M06-2X/6-31+G\*\* geometries, along with relative energies in the lower part of the table. The geometries were obtained by fixing the distances between the olefinic carbons and carbonyl carbon of the ketene; these fixed distances are shown across the top row and in the left column of the table. The key observation is that the CCSD(T) calculations suggest a symmetrical potential energy saddle point with C-C distances between 2.2 and 2.1 Å. This is exactly what is observed in the MPW1K/6-31+G\*\* calculations, supporting the choice of the later for the focal studies in the main text. M06/6-31+G\*\* calculations are similar in the area of the saddle point but their energy drops more rapidly in the area after the saddle point than seen in the CCSD(T) calculations.

|     | 2.3          | 2.2          | 2.1          | 2            | 1.9          | 1.8          | 1.7          | 1.6          |
|-----|--------------|--------------|--------------|--------------|--------------|--------------|--------------|--------------|
| 2.3 | -1227.189256 | -1227.188867 | -1227.188196 | -1227.187307 | -1227.186382 | -1227.185609 | -1227.185262 | -1227.264464 |
| 2.2 | -1227.188867 | -1227.188622 | -1227.188591 | -1227.188374 | -1227.188070 | -1227.188026 | -1227.188824 | -1227.269317 |
| 2.1 | -1227.188196 | -1227.188591 | -1227.188616 | -1227.188792 | -1227.189034 | -1227.189469 | -1227.190846 | -1227.268318 |
| 2   | -1227.187307 | -1227.188374 | -1227.188792 | -1227.188871 | -1227.189236 | -1227.189928 | -1227.191246 | -1227.261752 |
| 1.9 | -1227.186382 | -1227.188070 | -1227.189034 | -1227.189236 | -1227.189225 | -1227.189650 | -1227.190494 | -1227.250039 |
| 1.8 | -1227.185609 | -1227.188026 | -1227.189469 | -1227.189928 | -1227.189650 | -1227.189407 | -1227.189132 | -1227.233294 |
| 1.7 | -1227.185262 | -1227.188824 | -1227.190846 | -1227.191246 | -1227.190494 | -1227.189132 | -1227.187508 | -1227.185256 |
| 1.6 | -1227.264464 | -1227.269317 | -1227.268318 | -1227.261752 | -1227.250039 | -1227.233294 | -1227.185256 | -1227.180864 |

  

|     | 2.3         | 2.2         | 2.1         | 2           | 1.9         | 1.8    | 1.7   | 1.6    |
|-----|-------------|-------------|-------------|-------------|-------------|--------|-------|--------|
| 2.3 | <b>0.00</b> | 0.24        | 0.67        | 1.22        | 1.80        | 2.29   | 2.51  | -47.19 |
| 2.2 | 0.24        | <b>0.40</b> | 0.42        | 0.55        | 0.74        | 0.77   | 0.27  | -50.24 |
| 2.1 | 0.67        | 0.42        | <b>0.40</b> | 0.29        | 0.14        | -0.13  | -1.00 | -49.61 |
| 2   | 1.22        | 0.55        | 0.29        | <b>0.24</b> | 0.01        | -0.42  | -1.25 | -45.49 |
| 1.9 | 1.80        | 0.74        | 0.14        | 0.01        | <b>0.02</b> | -0.25  | -0.78 | -38.14 |
| 1.8 | 2.29        | 0.77        | -0.13       | -0.42       | -0.25       | -0.09  | 0.08  | -27.63 |
| 1.7 | 2.51        | 0.27        | -1.00       | -1.25       | -0.78       | 0.08   | 1.10  | 2.51   |
| 1.6 | -47.19      | -50.24      | -49.61      | -45.49      | -38.14      | -27.63 | 2.51  | 5.27   |

The stationary points **5**<sup>‡</sup> and **6**<sup>‡</sup>, as well as the VRI, are all spin-unrestricted stable in UMPW1K/6-31+G\*\* calculations.

### Mode 3.

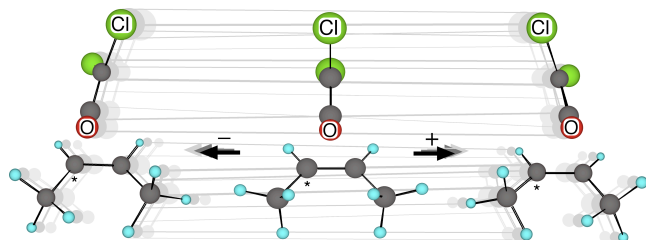

As discussed in the main text, “mode 3” desymmetrizes the transition structure in such a way that the combination of motion in this mode and motion along the transition vector morphs the transition structure toward the product geometries. This is a simplification – naturally motion toward the products involves some combination of motion in all of the normal modes of the transition structure – but the combination of the two modes accounts for the largest geometry changes needed to get the molecule to a point where it is committed to form a particular product.

Mode 3 itself is well separated in energy from other modes ( $74.1\text{ cm}^{-1}$  with nearest neighbors at  $33.5$  and  $116.1\text{ cm}^{-1}$ ). As a result, the nature of this mode changes little with isotopic mass in the olefinic carbons. The frequency also changes little (to  $72.6\text{ cm}^{-1}$ ) with a change in the olefinic carbon mass to 140, since most of the motion associated with the mode is in the dichloroketene moiety.

The frequencies above are for the MPW1K/6-31G\* calculations since those are the calculations that are relevant to the trajectories. However, the frequencies in the MPW1K/6-31+G\*\* calculations are similar:  $77.3\text{ cm}^{-1}$  for mode 3 and  $43.1\text{ cm}^{-1}$  and  $97.4\text{ cm}^{-1}$  for the nearest neighbors.

### Initialization of Trajectories and Additional Details on Trajectories

Most of the trajectories employed in the manuscript are quasiclassical, i. e. including zero-point energy plus a Boltzmann distribution of quantized vibrational energies for each mode. As mentioned in the main text, some trajectories started from  $\mathbf{5}^\ddagger$  were carried out in fully classical mode, i. e. including only a classical Boltzmann distribution of energy. For the trajectories, the desired energy in each of the normal modes was mapped from a random number generator to a Boltzmann distribution set at  $25\text{ }^\circ\text{C}$ . The phase of each of the normal modes was mapped from Gaussian distribution of random numbers. This distribution is not correct for a classical oscillator but would be approximately correct for a quantum oscillator in its ground state (only ignoring mode displacements outside of the classical limit), and has the advantage that a larger portion of the trajectories start with an energy approximating the initially desired energy. The sign on the velocity of the normal modes was randomized, except that for trajectories started from  $\mathbf{5}^\ddagger$  the "controlphase" option in PROGDYN was used to obtain an equal number of trajectories with positive versus negative velocities in mode 3. After an energy/force calculation on the initial geometry, the total initial energy was calculated and the trajectory was thrown out if the energy did not agree satisfactorily (within  $1\text{ kcal/mol}$ ) with the desired energy. (This is a variation of the conventional practice of scaling energies. (S9)) The mode corresponding to the transition vector was treated classically. For most trajectories, the sign on the transition vector was set so as to start the trajectory in the direction of the cycloadduct product, but a portion of the trajectories were integrated both forward and backward in time as a check for anomalies.

After exploratory study of over 1000 trajectories started from  $\mathbf{5}^\ddagger$ , the stopping criteria for

trajectories were set as shown in the diagram below. These distances were set in such a way that the trajectory was fully committed to product formation or recrossing; in other words the stopping criteria made no mistakes in over 1000 test cases of trajectories continued for longer times. A 500 fs time limit was set for the trajectories to minimize the effect of nonphysical intramolecular redistribution of the zero-point energy. A small proportion of trajectories did not complete within this time limit, depending logically on the isotopologue under study (0.2% for the parent isotopologue, 2.5% when both olefinic carbons were mass 140). These trajectories were ignored.

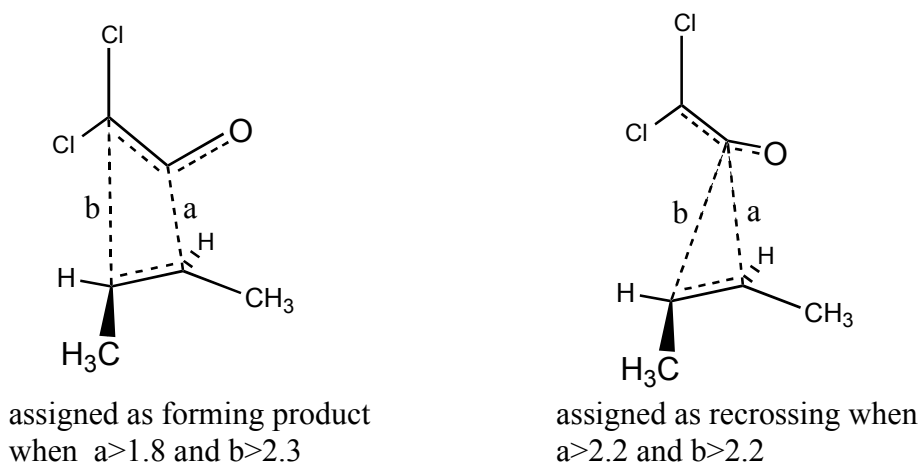

We performed a limited set of trajectories started from  $\mathbf{5}^\ddagger$  with M06/6-31G\* calculations. The M06 surface is qualitatively similar to the MPW1K surface, but as described above the M06 surface does not fit quite as well with the CCSD(T) surface, so we focused on the MPW1K calculations. In 36 trajectories without isotopic labeling, 19 M06 trajectories recrossed and 17 formed product. The average times for recrossing and product formation were 243 and 191 fs. This is in the ballpark of what is seen with MPW1K but the uncertainties derived from this limited set of numbers is very large. The important observation is that there is no qualitative difference.

For the Diels-Alder reactions of **7**, the trajectories were assigned as product forming when distance  $c$  in the drawing below was  $< 2.0 \text{ \AA}$  and distance  $d$  was  $< 1.8 \text{ \AA}$ . The trajectories were assigned as recrossing when  $c > 2.5$  and  $d > 2.3$ . No Diels-Alder trajectories reached the 500 fs time limit.

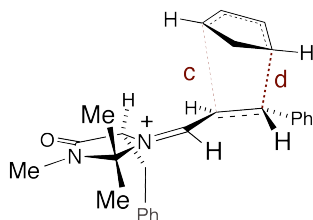

A reviewer asked whether the energy in mode 3 of  $\mathbf{5}^\ddagger$  influenced the outcome of trajectories. It does. The graph below shows a histogram of the outcome of trajectories versus the velocity in mode 3. It can be seen that the recrossing trajectories are center-weighted, that is, as the reviewer expected, the greater the velocity in mode 3 the greater the chance that a product is formed instead of recrossing to the starting material. This is qualitatively understandable from



the expectation that trajectories proceeding down the middle of the potential energy surface in Figure 1 of the main text would be positioned well to bounce back to the starting materials. We have previously described this phenomenon for a Diels-Alder reaction in reference 6b from the main text.

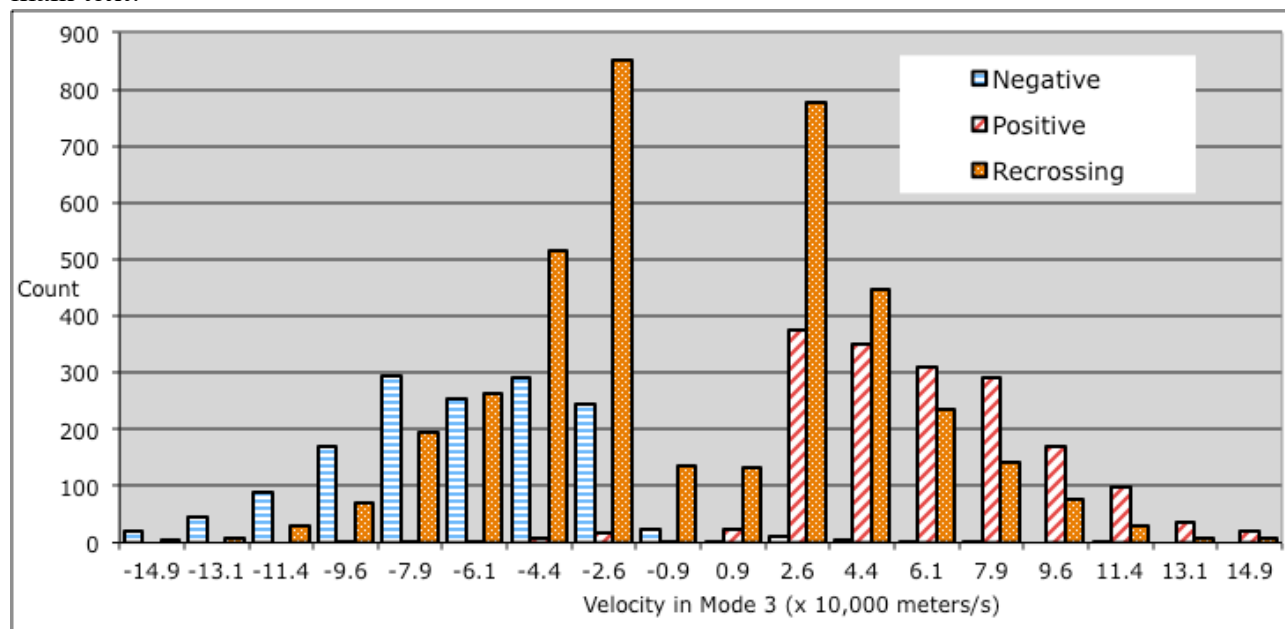

### Uncertainties in the Trajectory Ratios, and Extrapolation of the Trajectory-Predicted KIE

To calculate the uncertainties in the trajectory ratios, we set up an Excel spreadsheet that would repeatedly simulate the complete set of trajectory runs with each choice of superheavy carbon. In the simulations, the outcome each individual trajectory depended on a random number and on a weighting that corresponded to the ratio of outcomes actually observed in the set of trajectories. Because of the weighting, the average outcome of an infinite number of Excel simulations would be equal to the outcome observed in the trajectories. Each individual simulation, however, departs from the observed outcome in a way that reflects the role of random chance on the results in a set of trajectories. From the results of 204 simulations, standard deviations was calculated: mass-140: 0.018; mass 76 0.022; mass 44 0.025; mass 28 0.018. The 95% confidence ranges would be twice these standard deviations. (A common mistake in handling experimental data is to set the 95% confidence range to twice the standard deviation, but in this case, because of the nature of the simulation, it is actually correct.)

The main text notes that when the trajectories have an initial positive sign for the mode-3 velocity (defining positive as in Figure 2), then  $\approx 98\%$  of the product formed is **3'**, while when mode 3 is negative,  $\approx 98\%$  of the product formed is **3**. The actual percentages calculated for the eight individual cases (counting each mass and each mode-3 sign) in Table 1 are 97-99%, and the uncertainties on these percentages, calculated as above, are between 0.5% and 0.8%.

To extrapolate the isotope effect to  $^{13}\text{C}$ , the procedure in reference 9 of the main text was employed. The extrapolation assumes that the additional isotope effect per additional mass unit decreases as the mass grows. For example, the effect of going from  $^{13}\text{C}$  to  $^{14}\text{C}$  would be larger than the effect of going from  $^{140}\text{C}$  to  $^{141}\text{C}$ . We further assumed that this decrease with mass is

nonlinear with a decreasing slope, that is, that a plot of the additional isotope effect per additional mass versus mass would have a greater slope at low masses (e.g.,  $^{13}\text{C}$  to  $^{14}\text{C}$ ) than at high masses (e.g.  $^{140}\text{C}$  to  $^{141}\text{C}$ ). These simple assumptions exclude some extrapolation processes that would lead to physically unreasonable isotope effects at both high masses and at  $^{13}\text{C}$ .

The “isotope effect per mass” is defined as the geometric average isotope effect, i. e., as in the equation below where the “additional mass” is defined as the mass beyond 12 amu. The extrapolation was then carried out by assuming a linear relationship between the log of the additional mass (the base is arbitrary but set most conveniently as 2) versus the isotope effect per mass. The extrapolation process used the Regression tool in Microsoft Excel 2004 for Mac, Version 11.3.3. The reported confidence limit in the main text is based on that analysis and the fit of the points to the regression line. The graph associated with the extrapolation is shown below.

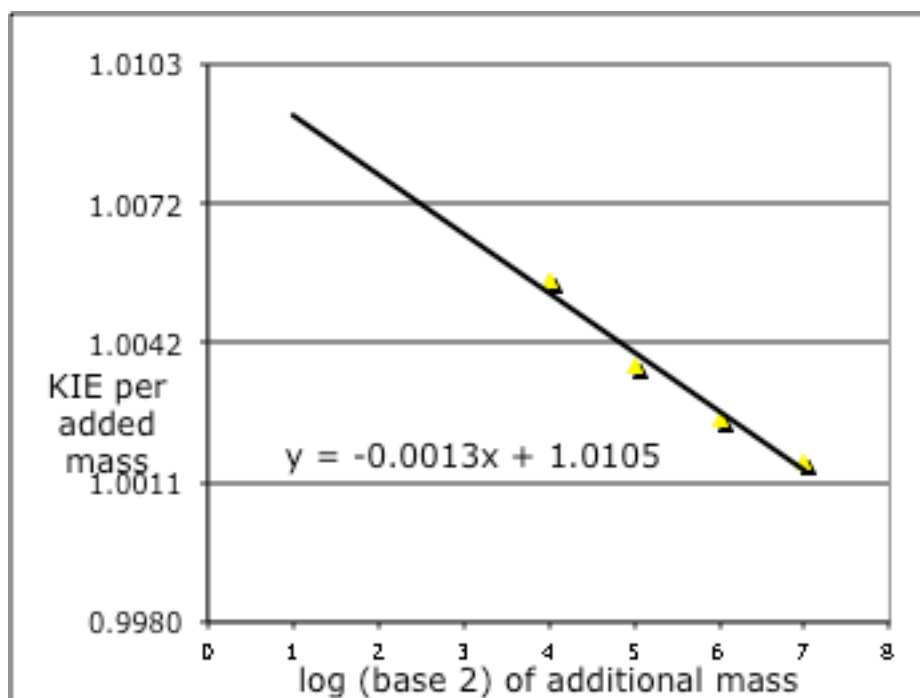

### The Canonical Variational TS near $5^\ddagger$ . Geometry and Discussion

The figure below shows the geometry of the canonical variational TS near  $5^\ddagger$  at the MPW1K/6-31+G\*\* and MPW1K/6-31G\* levels. These TS's are near each other (interestingly more so than are the potential energy saddle points). While they are displaced somewhat from the potential energy saddle point (as is typical for bimolecular reactions), they are still fairly closely associated with the saddle points. This can be understood because the potential energy saddle point is straddled by areas of higher entropy. Going backward, then entropy increases due to the dissociation into two components. Going forward, the entropy increases as the structure approaches a valley-ridge inflection point and one of the transverse frequencies approaches 0.

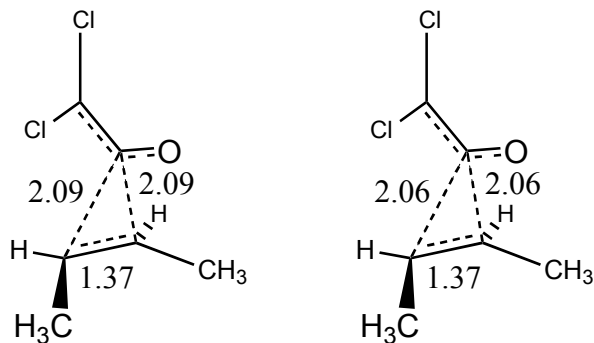

MPW1K/6-31+G\*\*  
first variational TS

MPW1K/6-31+G\*\*  
first variational TS

These structures are geometrically far from the average turning points seen in the recrossing trajectories, where the average closest approach of the carbonyl carbon to the olefinic carbons was 1.69 Å.

It should be noted that a standard GAUSSRATE/POLYRATE calculation on these reactions cannot locate the later dynamical bottlenecks. This is because the MEP going forward from the potential energy saddle point remains symmetrical all the way to **6**<sup>‡</sup>. Only when the path is redefined as in the Lluch procedure (see the next section) can the asymmetric second variational TS / dynamical bottleneck be located.

### The Second Variational TS / Dynamical Bottleneck

In going forward from **5**<sup>‡</sup> along the IRC, the path reaches a  $C_3$ -symmetric valley-ridge inflection point, defined by having a force constant of 0 in an orthogonal mode. To continue along two separate paths to the products **3** and **3'**, we followed the procedure of Lluch (reference 14 in the main text). For the <sup>13</sup>C-substituted molecule, we created the starting point for two paths by stepping away from the VRI along the orthogonal mode in each direction by 0.05 au. These points were then followed downward using the Page-McIver algorithm in POLYRATE, treating the starting points as the initial point in the path using the NOSADDLE algorithm in POLYRATE. After some distance, these paths encounter dynamical bottlenecks at positions that depend on the temperature (for the canonical variational TS, treating the energy distribution as a canonical Boltzmann distribution) or the energy (for the microcanonical RRKM procedure described in the main text). The canonical variational TSs for formation of **3** or **3'** at 25 °C were determined using POLYRATE, and they have the approximate geometry shown below. The energy-dependent bottlenecks for the variational RRKM procedure in the main text were roughly in the area of the structure below; more details will be provided in a later section.

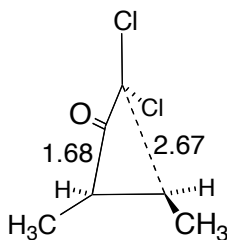

The graph below shows the potential energy as one proceeds along the Lluch path after the VRI, along with the “raw” E+zpe, Enthalpy (298), and Free energy (298) that one gets from a Gaussian calculation. These raw numbers arise from harmonic frequencies in Cartesian coordinates without factoring out motion along the reaction coordinate. (As an aside, we do not

use these raw numbers for anything in the main text; rather we use the free energies and frequencies from Polyrate. However, Polyrate uses a strange vibrational partition function of  $1 \times 10^{10}$  for extra imaginary frequencies and it does not calculate enthalpy, making it less useful for the discussion here.) A problem is that there are too many imaginary frequencies (or bad near-zero frequencies) in the area of the VRI. As a result, the free energy takes wild jumps in this area and is not really meaningful.

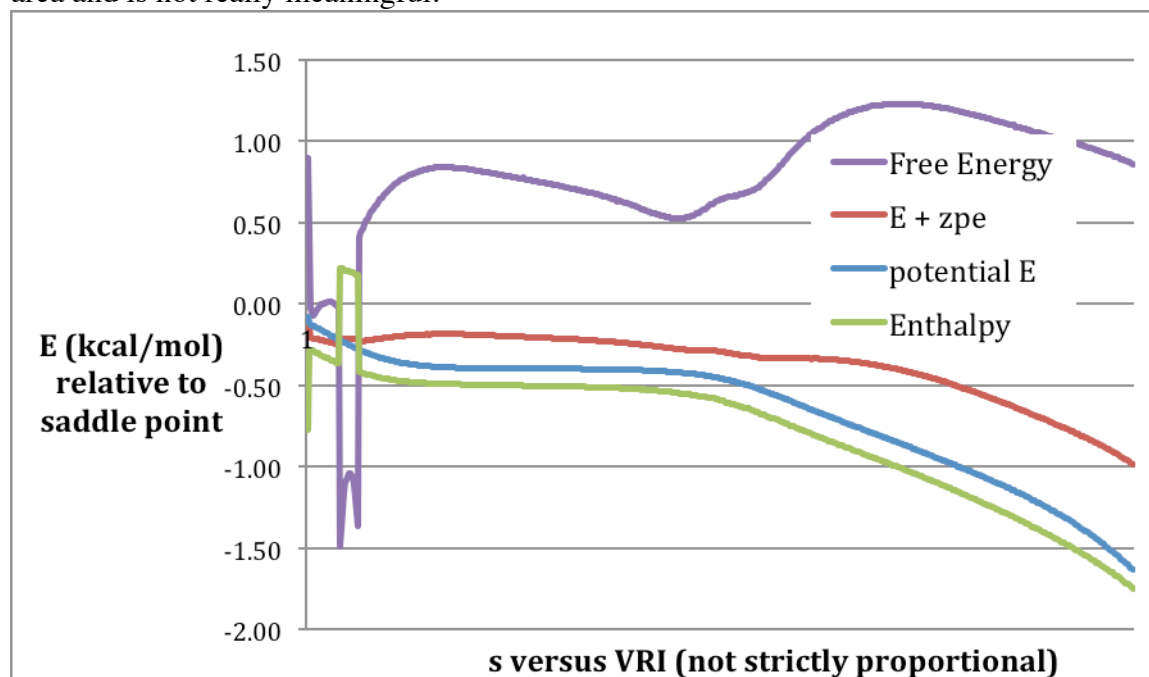

### Microcanonical Variational Prediction of the KIE

The two complete paths from  $5^\ddagger$  to  $3$  and  $3'$  consist of two parts – a part passing through  $5^\ddagger$  up to the area of the VRI, which was treated as being identical for the two paths, and the part after the step away from the VRI, which was different for the two paths due to the presence of a  $^{13}\text{C}$ . The POLYRATE calculations provided frequency calculations at regular intervals ( $0.023813 \text{ \AA amu}^{1/2}$ ) along each path, having factored out motion along the reaction coordinate and having calculated the frequencies at these non-stationary points in redundant curvilinear coordinates. The POLYRATE frequencies (with extra digits added due to the modifications described in a previous section) and the rotational constants from the saved frequency calculation files were used to construct input files for the RRKM program.

In a short area of the surface past the VRI, the points on the path have an extra imaginary frequency, i. e., one that is not associated with the reaction coordinate. Although POLYRATE makes estimates, the free-energy in these areas is not well defined, but it is largely sufficient for our purposes here to note that an area of the surface with an extra imaginary frequency should not have a dynamical bottleneck along the path. Accordingly, no RRKM rate constants were calculated for these points.

The RRKM rate constants were calculated at each point along the paths at a series of energies up to 18 kcal/mol above the threshold energy, in 0.1 kcal/mol increments. At each energy, three points were located: 1. the minimum rate constant in the area of  $5^\ddagger$  (referred to below as  $k_1$ ), 2. the minimum rate constant in the area of the second dynamical bottleneck (referred to below as  $k_2$ ), and 3. the maximum rate constant in between the two areas (referred to

below as  $k_c$ ). The calculated  $k_1$ , which is exactly the same for the two paths, was divided by 2 to allow for the division of trajectories passing  $\mathbf{5}^\ddagger$  between the two channels. The unified statistical rate constant ( $k_{US}$ ) at each energy was then calculated from the equation:  $(1/k_{US}) = 1/k_1 - 1/k_c + 1/k_2$ . The  $k_2$  passes below  $k_1$  at 1.0 kcal/mol above the threshold energy, and at most energies the  $k_{US}$  was within 25% of the  $k_2$  value.

Our inability to calculate realistic rate constants in the area of the surface past the VRI, as described above, could lead to an underestimation of  $k_c$  values. However, the predicted KIE is not very sensitive to the  $k_c$  values and it remains at 0.992 when all of the values are increased by a factor of 10.

Because of numerical noise in the calculated  $k_2$  values and because of their non-continuous nature, the  $k_2$  values at each point were calculated by least-squares fitting of the point and the surrounding 20 points (10 in each direction) to a quadratic function. The reported  $k_2$  values and corresponding  $s$  values (see below) were for the minimum of the derived quadratic function.

The energy distribution in  $\mathbf{5}^\ddagger$  was calculated using the subprogram *progenHP* of PROGDYN. In a repeated process, each normal mode in  $\mathbf{5}^\ddagger$  was given its zero-point energy plus a Boltzmann sampling of additional energy appropriate for 25 °C, and the transition vector was given a classical Boltzmann sampling of energy. The total energy was recorded, and the process was repeated 23,559 times. Using the histogram function in an Excel spreadsheet, the resulting energies were divided into bins separated by 0.1 kcal/mol.

The overall rate constant along each path was found by taking the count in each bin, multiplying by  $k_{US}$ , adding up the results, and dividing by 23,559. The KIE was then calculated from the ratio of the overall rate constants for the two paths.

A total  $k_1$  rate constant was calculated by taking the count in each bin, multiplying by  $k_1$ , adding up the results, and dividing by 23,559. The recrossing percentage was calculated as  $100 \times (1 - k_{US}/k_1)$  (using the total  $k_1$  and  $k_{US}$  values instead of the energy-specific values).

The table below gives:

Ebin - the energy of the bins starting at the threshold energy. The energies were calculated versus a prereactive complex. The complex is not kinetically significant and its energetics cancel out in the calculations of isotope effects. Its choice as the formal starting material for RRKM calculations was solely to make the calculations convenient. An Ebin of 8.1 kcal/mol refers to energies between 8.05 and 8.15 kcal/mol.

count - the number of molecules out of 23,559 that have an energy in the bin

$k_1$  - the minimum rate constant in the area of  $\mathbf{5}^\ddagger$  at the Ebin energy in  $s^{-1}$ .  $k_1$  is the same for both paths.

$s_1$  - the distance along on the path corresponding to  $k_1$ , relative to  $\mathbf{5}^\ddagger$ , in  $\text{\AA} \text{amu}^{1/2}$ .

$k_2$ - $\mathbf{3}$  - the minimum rate constant in the area of the second dynamical bottleneck along the path leading to product  $\mathbf{3}$  (the major product, having the  $^{13}\text{C}$  next to the carbonyl).

$s_2$ - $\mathbf{3}$  - a measure of the distance along the path corresponding to  $k_2$ - $\mathbf{3}$ . The 0 for these numbers is arbitrary, but each unit is equal to  $0.023813 \text{\AA} \text{amu}^{1/2}$ .

$k_c$ - $\mathbf{3}$  - the maximum rate constant in between the two bottleneck areas along the path leading to product  $\mathbf{3}$

$k_{US}$ - $\mathbf{3}$  - the unified statistical rate constant at that energy along the path leading to product  $\mathbf{3}$ , calculated as described above

| Ebin | count | s1    | k <sub>1</sub> | s2-3  | k <sub>2</sub> -3 | k <sub>c</sub> -3 | k <sub>US</sub> -3 |
|------|-------|-------|----------------|-------|-------------------|-------------------|--------------------|
| 8    | 0     | --    | 0.00           | 36.95 | 0.0826            | 0.7045            | 0                  |
| 8.1  | 1     | 0.143 | 0.06           | 36.67 | 0.4441            | 2.338             | 0.0566             |
| 8.2  | 2     | 0.143 | 0.23           | 38.10 | 0.7948            | 5.192             | 0.1864             |
| 8.3  | 5     | 0.191 | 0.53           | 38.60 | 1.4077            | 9.528             | 0.4012             |
| 8.4  | 9     | 0.238 | 1.02           | 38.78 | 2.2515            | 16.56             | 0.7338             |
| 8.5  | 12    | 0.238 | 1.81           | 38.86 | 3.8240            | 26.95             | 1.289              |
| 8.6  | 9     | 0.238 | 3.10           | 71.44 | 4.6811            | 39.98             | 1.9578             |
| 8.7  | 12    | 0.238 | 4.51           | 72.77 | 6.0656            | 57.04             | 2.7083             |
| 8.8  | 22    | 0.238 | 6.55           | 74.29 | 8.4506            | 78.94             | 3.8709             |
| 8.9  | 27    | 0.238 | 9.21           | 73.35 | 10.4754           | 106               | 5.1386             |
| 9    | 47    | 0.238 | 12.41          | 73.97 | 12.2528           | 139.5             | 6.4505             |
| 9.1  | 40    | 0.238 | 16.54          | 75.61 | 15.1093           | 180.1             | 8.257              |
| 9.2  | 51    | 0.238 | 21.53          | 76.65 | 18.3504           | 228.8             | 10.3551            |
| 9.3  | 76    | 0.286 | 27.44          | 76.76 | 21.8377           | 285.7             | 12.6997            |
| 9.4  | 77    | 0.286 | 34.56          | 77.17 | 25.4763           | 353.4             | 15.3004            |
| 9.5  | 94    | 0.286 | 42.99          | 77.98 | 29.7680           | 431.5             | 18.3353            |
| 9.6  | 103   | 0.286 | 52.60          | 78.15 | 34.3911           | 521.3             | 21.6589            |
| 9.7  | 111   | 0.286 | 63.85          | 78.63 | 39.7148           | 623.4             | 25.4861            |
| 9.8  | 124   | 0.286 | 76.70          | 78.95 | 45.4784           | 739.4             | 29.6966            |
| 9.9  | 141   | 0.286 | 91.20          | 79.90 | 51.4920           | 870.2             | 34.2041            |
| 10   | 128   | 0.286 | 107.85         | 80.33 | 58.2072           | 1017              | 39.2636            |
| 10.1 | 169   | 0.286 | 126.50         | 80.70 | 65.5521           | 1180              | 44.8175            |
| 10.2 | 170   | 0.286 | 147.15         | 81.31 | 73.4593           | 1361              | 50.8284            |
| 10.3 | 208   | 0.286 | 170.50         | 81.54 | 81.8091           | 1562              | 57.3116            |
| 10.4 | 221   | 0.286 | 196.10         | 81.95 | 90.5689           | 1782              | 64.1866            |
| 10.5 | 201   | 0.286 | 224.35         | 82.58 | 100.2562          | 2023              | 71.7491            |
| 10.6 | 211   | 0.286 | 255.50         | 82.96 | 110.4411          | 2286              | 79.8018            |
| 10.7 | 254   | 0.286 | 289.50         | 83.47 | 121.2954          | 2571              | 88.4204            |
| 10.8 | 293   | 0.286 | 326.55         | 83.75 | 132.6864          | 2881              | 97.544             |
| 10.9 | 263   | 0.286 | 366.90         | 84.40 | 144.7484          | 3216              | 107.2601           |
| 11   | 284   | 0.286 | 410.50         | 84.79 | 157.3762          | 3576              | 117.5003           |
| 11.1 | 280   | 0.286 | 457.55         | 85.25 | 170.8226          | 3963              | 128.4151           |
| 11.2 | 297   | 0.286 | 508.50         | 85.55 | 184.8795          | 4378              | 139.9173           |
| 11.3 | 322   | 0.286 | 563.00         | 85.85 | 199.5456          | 4821              | 151.972            |
| 11.4 | 310   | 0.286 | 621.00         | 86.35 | 215.0659          | 5294              | 164.7134           |
| 11.5 | 345   | 0.286 | 683.50         | 86.73 | 231.0400          | 5797              | 177.9737           |
| 11.6 | 370   | 0.286 | 750.00         | 87.14 | 247.7975          | 6331              | 191.9042           |
| 11.7 | 374   | 0.333 | 820.50         | 87.44 | 265.2180          | 6897              | 206.4298           |
| 11.8 | 424   | 0.333 | 895.50         | 87.72 | 283.2987          | 7495              | 221.5764           |
| 11.9 | 386   | 0.333 | 974.50         | 88.33 | 302.3433          | 8128              | 237.4939           |
| 12   | 371   | 0.333 | 1058.50        | 88.68 | 321.7724          | 8794              | 253.884            |
| 12.1 | 367   | 0.333 | 1147.00        | 89.00 | 341.9725          | 9496              | 270.9481           |
| 12.2 | 422   | 0.333 | 1240.50        | 89.43 | 363.0067          | 10230             | 288.7549           |
| 12.3 | 431   | 0.333 | 1339.00        | 89.76 | 384.6075          | 11010             | 307.1204           |

|      |     |       |          |        |           |       |           |
|------|-----|-------|----------|--------|-----------|-------|-----------|
| 12.4 | 421 | 0.333 | 1442.50  | 90.06  | 406.9683  | 11820 | 326.1757  |
| 12.5 | 435 | 0.333 | 1551.00  | 90.37  | 429.9620  | 12670 | 345.8286  |
| 12.6 | 382 | 0.333 | 1664.50  | 90.65  | 453.6826  | 13550 | 366.1442  |
| 12.7 | 419 | 0.333 | 1784.00  | 90.95  | 478.1732  | 14480 | 387.1813  |
| 12.8 | 380 | 0.333 | 1908.50  | 91.23  | 503.5276  | 15450 | 408.9586  |
| 12.9 | 401 | 0.333 | 2038.50  | 91.51  | 529.4057  | 16450 | 431.2804  |
| 13   | 452 | 0.333 | 2174.00  | 91.79  | 555.9918  | 17500 | 454.251   |
| 13.1 | 366 | 0.333 | 2315.50  | 92.37  | 583.3671  | 18590 | 477.9507  |
| 13.2 | 400 | 0.333 | 2463.00  | 92.66  | 611.4113  | 19720 | 502.2957  |
| 13.3 | 379 | 0.333 | 2616.00  | 92.92  | 640.1487  | 20890 | 527.2787  |
| 13.4 | 387 | 0.333 | 2775.00  | 93.75  | 669.9270  | 22110 | 553.1488  |
| 13.5 | 388 | 0.333 | 2940.00  | 94.05  | 700.0433  | 23370 | 579.4316  |
| 13.6 | 381 | 0.333 | 3111.50  | 94.34  | 730.8651  | 24670 | 606.3932  |
| 13.7 | 401 | 0.333 | 3289.00  | 94.63  | 762.4160  | 26020 | 634.0223  |
| 13.8 | 348 | 0.333 | 3472.50  | 94.91  | 794.6596  | 27410 | 662.298   |
| 13.9 | 374 | 0.333 | 3662.50  | 95.45  | 827.6976  | 28850 | 691.3018  |
| 14   | 347 | 0.333 | 3859.50  | 95.73  | 861.3375  | 30340 | 720.915   |
| 14.1 | 328 | 0.333 | 4062.50  | 96.00  | 895.6581  | 31870 | 751.1602  |
| 14.2 | 375 | 0.333 | 4272.00  | 96.27  | 930.6869  | 33450 | 782.0673  |
| 14.3 | 322 | 0.333 | 4488.00  | 96.53  | 966.3645  | 35070 | 813.598   |
| 14.4 | 304 | 0.333 | 4711.00  | 96.78  | 1002.6461 | 36740 | 845.7291  |
| 14.5 | 329 | 0.333 | 4941.00  | 97.42  | 1040.2409 | 38460 | 878.9641  |
| 14.6 | 322 | 0.333 | 5175.00  | 97.56  | 1077.8597 | 40230 | 912.2888  |
| 14.7 | 305 | 0.333 | 5420.00  | 97.95  | 1116.5592 | 42050 | 946.6745  |
| 14.8 | 277 | 0.333 | 5670.00  | 98.34  | 1155.8330 | 43910 | 981.5759  |
| 14.9 | 304 | 0.333 | 5930.00  | 98.55  | 1195.4444 | 45830 | 1016.9595 |
| 15   | 282 | 0.333 | 6195.00  | 98.87  | 1236.0679 | 47790 | 1053.1719 |
| 15.1 | 244 | 0.333 | 6465.00  | 99.22  | 1278.2421 | 49800 | 1090.6039 |
| 15.2 | 267 | 0.333 | 6745.00  | 99.58  | 1319.9752 | 51870 | 1127.9438 |
| 15.3 | 241 | 0.333 | 7030.00  | 99.91  | 1362.4845 | 53980 | 1165.9422 |
| 15.4 | 229 | 0.333 | 7320.00  | 100.15 | 1405.7416 | 56140 | 1204.5759 |
| 15.5 | 242 | 0.333 | 7620.00  | 100.50 | 1449.5646 | 58360 | 1243.8416 |
| 15.6 | 244 | 0.333 | 7930.00  | 100.75 | 1493.9125 | 60630 | 1283.7083 |
| 15.7 | 208 | 0.333 | 8245.00  | 101.22 | 1538.8823 | 62940 | 1324.1179 |
| 15.8 | 208 | 0.333 | 8565.00  | 101.52 | 1584.6583 | 65310 | 1365.1998 |
| 15.9 | 200 | 0.333 | 8895.00  | 101.83 | 1630.9179 | 67730 | 1406.846  |
| 16   | 182 | 0.333 | 9235.00  | 102.19 | 1678.2831 | 70200 | 1449.5154 |
| 16.1 | 195 | 0.333 | 9580.00  | 102.48 | 1725.7431 | 72730 | 1492.3253 |
| 16.2 | 180 | 0.333 | 9930.00  | 102.81 | 1773.8749 | 75300 | 1535.7154 |
| 16.3 | 172 | 0.333 | 10290.00 | 103.05 | 1822.7561 | 77930 | 1579.8551 |
| 16.4 | 139 | 0.333 | 10660.00 | 103.34 | 1872.3077 | 80610 | 1624.6862 |
| 16.5 | 152 | 0.333 | 11035.00 | 103.56 | 1922.1743 | 83350 | 1669.8189 |
| 16.6 | 146 | 0.333 | 11420.00 | 103.89 | 1973.0308 | 86130 | 1715.8846 |
| 16.7 | 131 | 0.333 | 11810.00 | 104.16 | 2024.2218 | 88970 | 1762.2659 |
| 16.8 | 130 | 0.333 | 12205.00 | 104.42 | 2076.0031 | 91870 | 1809.1573 |
| 16.9 | 124 | 0.333 | 12615.00 | 104.68 | 2128.3555 | 94810 | 1856.7702 |

|      |     |       |          |        |           |        |           |
|------|-----|-------|----------|--------|-----------|--------|-----------|
| 17   | 127 | 0.333 | 13025.00 | 104.92 | 2181.5236 | 97810  | 1904.9551 |
| 17.1 | 114 | 0.333 | 13450.00 | 105.14 | 2234.8499 | 100900 | 1953.5219 |
| 17.2 | 113 | 0.333 | 13880.00 | 105.38 | 2289.0471 | 104000 | 2002.829  |
| 17.3 | 80  | 0.333 | 14315.00 | 105.66 | 2344.0195 | 107100 | 2052.8092 |
| 17.4 | 95  | 0.333 | 14760.00 | 105.91 | 2399.2353 | 110300 | 2103.1203 |
| 17.5 | 110 | 0.333 | 15215.00 | 106.61 | 2455.1077 | 113600 | 2154.0773 |
| 17.6 | 90  | 0.333 | 15675.00 | 106.81 | 2511.5391 | 116900 | 2205.5397 |
| 17.7 | 83  | 0.333 | 16145.00 | 107.50 | 2568.7387 | 120300 | 2257.7326 |
| 17.8 | 66  | 0.333 | 16620.00 | 107.81 | 2626.3621 | 123700 | 2310.3267 |
| 17.9 | 74  | 0.333 | 17105.00 | 108.78 | 2684.3837 | 127200 | 2363.3634 |
| 18   | 66  | 0.333 | 17600.00 | 109.05 | 2742.7697 | 130800 | 2416.814  |
| 18.1 | 60  | 0.333 | 18100.00 | 109.56 | 2801.8092 | 134300 | 2470.8755 |
| 18.2 | 71  | 0.333 | 18610.00 | 109.87 | 2861.1477 | 138000 | 2525.2636 |
| 18.3 | 67  | 0.333 | 19125.00 | 110.17 | 2921.0199 | 141700 | 2580.1352 |
| 18.4 | 49  | 0.333 | 19650.00 | 110.10 | 2980.7123 | 145400 | 2635.0233 |
| 18.5 | 53  | 0.333 | 20185.00 | 110.36 | 3041.8956 | 149200 | 2691.1981 |
| 18.6 | 40  | 0.333 | 20725.00 | 110.59 | 3103.5344 | 153100 | 2747.7623 |
| 18.7 | 54  | 0.333 | 21275.00 | 111.13 | 3164.7244 | 157000 | 2804.1258 |
| 18.8 | 47  | 0.333 | 21830.00 | 111.35 | 3226.8902 | 161000 | 2861.2858 |
| 18.9 | 37  | 0.333 | 22395.00 | 111.58 | 3290.1426 | 165000 | 2919.4488 |
| 19   | 31  | 0.333 | 22970.00 | 111.78 | 3353.6444 | 169100 | 2977.9235 |
| 19.1 | 44  | 0.333 | 23550.00 | 112.04 | 3417.3402 | 173200 | 3036.6117 |
| 19.2 | 36  | 0.333 | 24140.00 | 112.25 | 3481.7078 | 177400 | 3095.9425 |
| 19.3 | 40  | 0.333 | 24735.00 | 112.48 | 3546.7491 | 181700 | 3155.8355 |
| 19.4 | 36  | 0.333 | 25340.00 | 112.67 | 3612.0089 | 185900 | 3216.072  |
| 19.5 | 23  | 0.333 | 25955.00 | 112.87 | 3678.0132 | 190300 | 3276.9772 |
| 19.6 | 28  | 0.333 | 26575.00 | 113.10 | 3744.3019 | 194700 | 3338.1656 |
| 19.7 | 23  | 0.333 | 27205.00 | 113.30 | 3811.2114 | 199200 | 3399.9539 |
| 19.8 | 23  | 0.333 | 27845.00 | 113.47 | 3878.4707 | 203700 | 3462.1544 |
| 19.9 | 16  | 0.333 | 28490.00 | 113.68 | 3946.1849 | 208200 | 3524.7722 |
| 20   | 20  | 0.333 | 29145.00 | 113.89 | 4014.3313 | 212800 | 3587.8372 |
| 20.1 | 18  | 0.333 | 29805.00 | 114.08 | 4082.9700 | 217500 | 3651.3212 |
| 20.2 | 13  | 0.333 | 30475.00 | 114.26 | 4152.2344 | 222200 | 3715.4346 |
| 20.3 | 16  | 0.333 | 31155.00 | 114.44 | 4221.7502 | 227000 | 3779.8484 |
| 20.4 | 12  | 0.333 | 31840.00 | 114.65 | 4291.9114 | 231900 | 3844.8044 |
| 20.5 | 15  | 0.333 | 32535.00 | 114.83 | 4362.0499 | 236700 | 3909.8943 |
| 20.6 | 15  | 0.333 | 33235.00 | 115.42 | 4433.0102 | 241700 | 3975.6412 |
| 20.7 | 9   | 0.333 | 33945.00 | 115.57 | 4504.2294 | 246700 | 4041.7191 |
| 20.8 | 11  | 0.333 | 34665.00 | 115.75 | 4575.8894 | 251700 | 4108.2725 |
| 20.9 | 11  | 0.333 | 35390.00 | 115.94 | 4647.9349 | 256800 | 4175.1596 |
| 21   | 10  | 0.333 | 36125.00 | 116.12 | 4720.5350 | 262000 | 4242.5867 |
| 21.1 | 7   | 0.333 | 36865.00 | 116.29 | 4793.2223 | 267200 | 4310.1329 |
| 21.2 | 6   | 0.333 | 37615.00 | 116.46 | 4866.6418 | 272400 | 4378.3878 |
| 21.3 | 3   | 0.333 | 38375.00 | 116.64 | 4940.3481 | 277700 | 4446.9642 |
| 21.4 | 7   | 0.333 | 39140.00 | 117.58 | 5014.4268 | 283100 | 4515.8638 |
| 21.5 | 7   | 0.333 | 39915.00 | 117.74 | 5088.7722 | 288500 | 4585.0928 |



|      |   |       |           |        |           |        |           |
|------|---|-------|-----------|--------|-----------|--------|-----------|
| 21.6 | 4 | 0.333 | 40695.00  | 117.92 | 5163.3571 | 294000 | 4654.5372 |
| 21.7 | 8 | 0.333 | 41485.00  | 118.10 | 5238.4798 | 299500 | 4724.5298 |
| 21.8 | 1 | 0.333 | 42285.00  | 118.27 | 5314.1096 | 305100 | 4795.0198 |
| 21.9 | 5 | 0.333 | 43090.00  | 118.41 | 5389.9527 | 310700 | 4865.7282 |
| 22   | 5 | 0.333 | 43900.00  | 118.59 | 5466.2704 | 316400 | 4936.8435 |
| 22.1 | 9 | 0.333 | 44725.00  | 118.73 | 5542.7173 | 322100 | 5008.2346 |
| 22.2 | 4 | 0.333 | 45550.00  | 118.92 | 5619.7578 | 327900 | 5080.067  |
| 22.3 | 5 | 0.333 | 46390.00  | 119.05 | 5697.1842 | 333700 | 5152.3824 |
| 22.4 | 0 | 0.333 | 47235.00  | 119.22 | 5774.8126 | 339600 | 5224.8817 |
| 22.5 | 6 | 0.333 | 48085.00  | 119.36 | 5852.8846 | 345500 | 5297.7867 |
| 22.6 | 0 | 0.333 | 48950.00  | 119.52 | 5931.3636 | 351500 | 5371.1648 |
| 22.7 | 5 | 0.333 | 49815.00  | 119.67 | 6010.2459 | 357600 | 5444.8319 |
| 22.8 | 1 | 0.333 | 50700.00  | 119.82 | 6089.5473 | 363700 | 5519.0633 |
| 22.9 | 2 | 0.333 | 51600.00  | 119.96 | 6169.1627 | 369800 | 5593.7099 |
| 23   | 5 | 0.333 | 52450.00  | 120.13 | 6248.7098 | 376000 | 5667.6735 |
| 23.1 | 0 | 0.333 | 53350.00  | 120.26 | 6328.8210 | 382200 | 5742.6701 |
| 23.2 | 1 | 0.333 | 54250.00  | 120.42 | 6409.5770 | 388500 | 5818.1577 |
| 23.3 | 2 | 0.333 | 55200.00  | 120.56 | 6490.4932 | 394900 | 5894.3097 |
| 23.4 | 0 | 0.333 | 56100.00  | 120.70 | 6571.5810 | 401300 | 5970.014  |
| 23.5 | 0 | 0.333 | 57050.00  | 120.86 | 6653.1384 | 407700 | 6046.6546 |
| 23.6 | 3 | 0.333 | 58000.00  | 120.98 | 6734.9267 | 414200 | 6123.4437 |
| 23.7 | 0 | 0.333 | 58900.00  | 122.30 | 6818.4882 | 420700 | 6201.1268 |
| 23.8 | 0 | 0.333 | 59900.00  | 122.21 | 6900.8935 | 427300 | 6278.9229 |
| 23.9 | 2 | 0.333 | 60850.00  | 122.69 | 6983.4289 | 434000 | 6356.2351 |
| 24   | 1 | 0.333 | 61800.00  | 122.83 | 7066.2282 | 440700 | 6433.7509 |
| 24.1 | 2 | 0.333 | 62800.00  | 122.73 | 7149.6569 | 447400 | 6512.3126 |
| 24.2 | 1 | 0.333 | 63750.00  | 122.91 | 7233.3442 | 454200 | 6590.5137 |
| 24.3 | 0 | 0.333 | 64750.00  | 123.08 | 7316.9282 | 461000 | 6669.1479 |
| 24.4 | 0 | 0.333 | 65750.00  | 123.23 | 7401.1014 | 467900 | 6748.2329 |
| 24.5 | 1 | 0.333 | 66750.00  | 123.40 | 7485.6179 | 474800 | 6827.587  |
| 24.6 | 0 | 0.333 | 67750.00  | 123.59 | 7570.2008 | 481800 | 6906.9603 |
| 24.7 | 1 | 0.333 | 68800.00  | 123.75 | 7655.2297 | 488800 | 6987.2066 |
| 24.8 | 0 | 0.333 | 69800.00  | 123.92 | 7740.3623 | 495900 | 7066.9865 |
| 24.9 | 0 | 0.333 | 70850.00  | 124.09 | 7825.9739 | 503100 | 7147.6424 |
| 25   | 0 | 0.333 | 71900.00  | 124.24 | 7911.6216 | 510200 | 7228.3307 |
| 25.1 | 0 | 0.333 | 72950.00  | 124.40 | 7997.8532 | 517500 | 7309.4497 |
| 25.2 | 0 | 0.333 | 74000.00  | 124.58 | 8084.2752 | 524700 | 7390.7323 |
| 25.3 | 0 | 0.333 | 75050.00  | 124.73 | 8170.7985 | 532000 | 7472.0651 |
| 25.4 | 0 | 0.333 | 76150.00  | 124.90 | 8257.6793 | 539400 | 7554.1559 |
| 25.5 | 0 | 0.333 | 77200.00  | 125.99 | 8347.5614 | 546800 | 7638.2517 |
| 25.6 | 0 | 0.333 | 78300.00  | 124.36 | 8436.1049 | 554300 | 7721.6837 |
| 25.7 | 0 | 0.333 | 79400.00  | 124.61 | 8523.6874 | 561800 | 7804.2944 |
| 25.8 | 1 | 0.333 | 80500.00  | 125.08 | 8610.6263 | 569300 | 7886.349  |
| 25.9 | 1 | 0.333 | 163200.00 | 125.28 | 8698.8400 | 576900 | 8378.5844 |

The table below gives:

**Ebin** - the energy of the bins starting at the threshold energy. The energies were calculated versus a prereactive complex. The complex is not kinetically significant and its energetics cancel out in the calculations of isotope effects. Its choice as the formal starting material for RRKM calculations was solely to make the calculations convenient. An Ebin of 8.1 kcal/mol refers to energies between 8.05 and 8.15 kcal/mol.

**$k_2\text{-}\mathbf{3}'$**  - the minimum rate constant in the area of the second dynamical bottleneck along the path leading to product  **$\mathbf{3}'$**  (the minor product, having the  $^{13}\text{C}$  distal to the carbonyl).

**s2- $\mathbf{3}'$**  - a measure of the distance along the path corresponding to  **$k_2\text{-}\mathbf{3}'$** . The 0 for these numbers is arbitrary, but each unit is equal to  $0.023813 \text{ \AA amu}^{1/2}$ .

**$k_c\text{-}\mathbf{3}'$**  - the maximum rate constant in between the two bottleneck areas along the path leading to product  **$\mathbf{3}'$**

**$k_{\text{US}}\text{-}\mathbf{3}'$**  - the unified statistical rate constant at that energy along the path leading to product  **$\mathbf{3}'$** , calculated as described above

**KIE-E** - The isotope effect at that energy, from the ratio of  **$k_{\text{US}}\text{-}\mathbf{3}'$**  and  **$k_{\text{US}}\text{-}\mathbf{3}$** .

| Ebin | s2- $\mathbf{3}'$ | $k_2\text{-}\mathbf{3}'$ | $k_c\text{-}\mathbf{3}'$ | $k_{\text{US}}\text{-}\mathbf{3}'$ | KIE-E  |
|------|-------------------|--------------------------|--------------------------|------------------------------------|--------|
| 8    | 37.64             | 0.0832                   | 1.285                    | 0                                  |        |
| 8.1  | 37.82             | 0.4392                   | 3.077                    | 0.0562                             | 0.9929 |
| 8.2  | 38.81             | 0.7785                   | 5.747                    | 0.1848                             | 0.9914 |
| 8.3  | 39.28             | 1.388                    | 9.82                     | 0.3991                             | 0.9948 |
| 8.4  | 39.35             | 2.2047                   | 16.42                    | 0.7291                             | 0.9936 |
| 8.5  | 39.50             | 3.779                    | 26.79                    | 1.2842                             | 0.9963 |
| 8.6  | 71.94             | 4.6357                   | 39.75                    | 1.9504                             | 0.9962 |
| 8.7  | 73.19             | 5.9946                   | 56.81                    | 2.6946                             | 0.9949 |
| 8.8  | 74.33             | 8.3406                   | 78.63                    | 3.8484                             | 0.9942 |
| 8.9  | 73.89             | 10.41                    | 105.6                    | 5.1238                             | 0.9971 |
| 9    | 74.33             | 12.1426                  | 139                      | 6.4209                             | 0.9954 |
| 9.1  | 75.86             | 14.9395                  | 179.5                    | 8.2073                             | 0.9940 |
| 9.2  | 77.22             | 18.1754                  | 228.1                    | 10.3006                            | 0.9947 |
| 9.3  | 77.29             | 21.6772                  | 285                      | 12.6466                            | 0.9958 |
| 9.4  | 77.57             | 25.2432                  | 352.6                    | 15.2175                            | 0.9946 |
| 9.5  | 78.41             | 29.4964                  | 430.6                    | 18.2335                            | 0.9944 |
| 9.6  | 78.75             | 34.0601                  | 520.4                    | 21.5287                            | 0.9940 |
| 9.7  | 79.34             | 39.4005                  | 622.5                    | 25.3577                            | 0.9950 |
| 9.8  | 79.67             | 45.1112                  | 738.5                    | 29.5411                            | 0.9948 |
| 9.9  | 80.44             | 51.034                   | 869.2                    | 34.003                             | 0.9941 |
| 10   | 80.64             | 57.5939                  | 1016                     | 38.9851                            | 0.9929 |
| 10.1 | 80.99             | 64.8852                  | 1179                     | 44.5061                            | 0.9931 |
| 10.2 | 81.59             | 72.7374                  | 1361                     | 50.4818                            | 0.9932 |
| 10.3 | 81.83             | 81.0185                  | 1561                     | 56.9238                            | 0.9932 |
| 10.4 | 82.39             | 89.704                   | 1781                     | 63.7522                            | 0.9932 |
| 10.5 | 82.72             | 99.2447                  | 2022                     | 71.2308                            | 0.9928 |
| 10.6 | 83.35             | 109.483                  | 2285                     | 79.3015                            | 0.9937 |
| 10.7 | 83.62             | 120.1483                 | 2571                     | 87.8092                            | 0.9931 |

|      |        |           |       |           |        |
|------|--------|-----------|-------|-----------|--------|
| 10.8 | 83.88  | 131.379   | 2881  | 96.8356   | 0.9927 |
| 10.9 | 84.39  | 143.3843  | 3216  | 106.5092  | 0.9930 |
| 11   | 84.75  | 155.9243  | 3577  | 116.6881  | 0.9931 |
| 11.1 | 85.21  | 169.2155  | 3965  | 127.5027  | 0.9929 |
| 11.2 | 85.46  | 183.0904  | 4380  | 138.8881  | 0.9926 |
| 11.3 | 85.73  | 197.6864  | 4824  | 150.8883  | 0.9929 |
| 11.4 | 86.31  | 212.994   | 5297  | 163.4925  | 0.9926 |
| 11.5 | 86.60  | 228.874   | 5801  | 176.6819  | 0.9927 |
| 11.6 | 86.86  | 245.4763  | 6336  | 190.5046  | 0.9927 |
| 11.7 | 87.39  | 262.97    | 6903  | 205.0601  | 0.9934 |
| 11.8 | 87.68  | 280.8918  | 7503  | 220.0944  | 0.9933 |
| 11.9 | 87.94  | 299.5057  | 8137  | 235.7319  | 0.9926 |
| 12   | 88.55  | 319.0192  | 8804  | 252.1587  | 0.9932 |
| 12.1 | 88.84  | 339.0975  | 9507  | 269.1313  | 0.9933 |
| 12.2 | 89.31  | 360.0783  | 10250 | 286.8832  | 0.9935 |
| 12.3 | 89.61  | 381.5009  | 11020 | 305.1285  | 0.9935 |
| 12.4 | 89.90  | 403.6925  | 11830 | 324.0606  | 0.9935 |
| 12.5 | 90.64  | 426.7786  | 12690 | 343.7515  | 0.9940 |
| 12.6 | 90.96  | 450.3719  | 13580 | 363.9632  | 0.9940 |
| 12.7 | 91.27  | 474.6777  | 14500 | 384.8722  | 0.9940 |
| 12.8 | 91.57  | 499.6355  | 15470 | 406.3737  | 0.9937 |
| 12.9 | 91.85  | 525.3309  | 16480 | 428.552   | 0.9937 |
| 13   | 92.27  | 551.947   | 17530 | 451.5274  | 0.9940 |
| 13.1 | 92.57  | 579.0749  | 18620 | 475.0461  | 0.9939 |
| 13.2 | 92.86  | 606.9181  | 19760 | 499.2336  | 0.9939 |
| 13.3 | 93.13  | 635.4383  | 20930 | 524.0537  | 0.9939 |
| 13.4 | 93.40  | 664.6776  | 22150 | 549.5404  | 0.9935 |
| 13.5 | 93.66  | 694.6432  | 23420 | 575.6968  | 0.9936 |
| 13.6 | 93.91  | 725.3235  | 24720 | 602.5438  | 0.9937 |
| 13.7 | 94.47  | 757.0487  | 26080 | 630.271   | 0.9941 |
| 13.8 | 94.74  | 789.1141  | 27470 | 658.407   | 0.9941 |
| 13.9 | 95.00  | 821.8723  | 28920 | 687.1938  | 0.9941 |
| 14   | 95.71  | 855.9859  | 30410 | 717.1232  | 0.9947 |
| 14.1 | 96.61  | 890.5272  | 31940 | 747.5096  | 0.9951 |
| 14.2 | 96.98  | 925.3282  | 33520 | 778.2421  | 0.9951 |
| 14.3 | 97.63  | 960.9162  | 35150 | 809.6901  | 0.9952 |
| 14.4 | 97.96  | 996.9879  | 36830 | 841.6527  | 0.9952 |
| 14.5 | 98.61  | 1033.6957 | 38560 | 874.2349  | 0.9946 |
| 14.6 | 99.02  | 1071.6672 | 40330 | 907.7979  | 0.9951 |
| 14.7 | 99.36  | 1109.7925 | 42150 | 941.7558  | 0.9948 |
| 14.8 | 99.72  | 1148.2845 | 44020 | 976.0723  | 0.9944 |
| 14.9 | 100.16 | 1187.867  | 45940 | 1011.4172 | 0.9946 |
| 15   | 100.54 | 1227.8932 | 47910 | 1047.174  | 0.9943 |
| 15.1 | 100.91 | 1268.673  | 49930 | 1083.569  | 0.9935 |
| 15.2 | 101.29 | 1310.1946 | 52000 | 1120.7338 | 0.9936 |
| 15.3 | 102.11 | 1352.1161 | 54120 | 1158.2768 | 0.9934 |

|      |        |           |        |           |        |
|------|--------|-----------|--------|-----------|--------|
| 15.4 | 102.15 | 1394.449  | 56300  | 1196.2021 | 0.9930 |
| 15.5 | 102.58 | 1437.8361 | 58520  | 1235.1245 | 0.9930 |
| 15.6 | 102.92 | 1481.489  | 60790  | 1274.4538 | 0.9928 |
| 15.7 | 103.23 | 1526.1136 | 63120  | 1314.5752 | 0.9928 |
| 15.8 | 104.01 | 1570.7469 | 65490  | 1354.785  | 0.9924 |
| 15.9 | 104.33 | 1616.3164 | 67920  | 1395.8872 | 0.9922 |
| 16   | 104.68 | 1662.5444 | 70400  | 1437.6763 | 0.9918 |
| 16.1 | 105.04 | 1709.3801 | 72940  | 1479.987  | 0.9917 |
| 16.2 | 106.15 | 1756.3339 | 75520  | 1522.4611 | 0.9914 |
| 16.3 | 106.36 | 1804.1501 | 78160  | 1565.7659 | 0.9911 |
| 16.4 | 106.61 | 1852.7943 | 80850  | 1609.8772 | 0.9909 |
| 16.5 | 107.00 | 1901.9108 | 83590  | 1654.4113 | 0.9908 |
| 16.6 | 107.19 | 1951.5934 | 86390  | 1699.547  | 0.9905 |
| 16.7 | 107.41 | 2001.764  | 89240  | 1745.1165 | 0.9903 |
| 16.8 | 107.63 | 2052.6922 | 92140  | 1791.326  | 0.9901 |
| 16.9 | 107.81 | 2104.118  | 95100  | 1838.1881 | 0.9900 |
| 17   | 108.01 | 2156.1853 | 98110  | 1885.4946 | 0.9898 |
| 17.1 | 108.20 | 2208.5771 | 101200 | 1933.3077 | 0.9897 |
| 17.2 | 108.42 | 2261.754  | 104300 | 1981.7948 | 0.9895 |
| 17.3 | 108.59 | 2315.5804 | 107500 | 2030.8212 | 0.9893 |
| 17.4 | 108.78 | 2369.8771 | 110700 | 2080.3858 | 0.9892 |
| 17.5 | 108.96 | 2424.5698 | 114000 | 2130.3929 | 0.9890 |
| 17.6 | 109.13 | 2479.9958 | 117300 | 2181.0385 | 0.9889 |
| 17.7 | 109.31 | 2536.1055 | 120700 | 2232.347  | 0.9888 |
| 17.8 | 109.48 | 2592.6888 | 124100 | 2284.0937 | 0.9886 |
| 17.9 | 109.66 | 2649.6686 | 127600 | 2336.2786 | 0.9885 |
| 18   | 109.84 | 2707.2952 | 131200 | 2389.0947 | 0.9885 |
| 18.1 | 110.01 | 2765.3305 | 134800 | 2442.2967 | 0.9884 |
| 18.2 | 110.17 | 2824.1153 | 138400 | 2496.2412 | 0.9885 |
| 18.3 | 110.35 | 2883.3737 | 142200 | 2550.5572 | 0.9885 |
| 18.4 | 110.49 | 2942.7224 | 145900 | 2605.1303 | 0.9887 |
| 18.5 | 110.65 | 3003.1045 | 149700 | 2660.6326 | 0.9886 |
| 18.6 | 110.81 | 3063.7321 | 153600 | 2716.3595 | 0.9886 |
| 18.7 | 110.97 | 3125.0708 | 157600 | 2772.763  | 0.9888 |
| 18.8 | 111.35 | 3187.034  | 161500 | 2829.7514 | 0.9890 |
| 18.9 | 111.48 | 3249.133  | 165600 | 2886.9311 | 0.9889 |
| 19   | 111.65 | 3311.815  | 169700 | 2944.7143 | 0.9888 |
| 19.1 | 111.80 | 3375.2163 | 173800 | 3003.1255 | 0.9890 |
| 19.2 | 111.94 | 3438.8552 | 178000 | 3061.8353 | 0.9890 |
| 19.3 | 112.09 | 3503.2186 | 182300 | 3121.1487 | 0.9890 |
| 19.4 | 112.24 | 3567.9055 | 186600 | 3180.8566 | 0.9891 |
| 19.5 | 112.37 | 3633.0031 | 191000 | 3240.9974 | 0.9890 |
| 19.6 | 112.54 | 3698.6182 | 195400 | 3301.6061 | 0.9890 |
| 19.7 | 112.66 | 3764.7967 | 199900 | 3362.7684 | 0.9891 |
| 19.8 | 112.82 | 3831.4426 | 204400 | 3424.4345 | 0.9891 |
| 19.9 | 112.93 | 3898.6157 | 209000 | 3486.5479 | 0.9892 |

|      |        |           |        |           |        |
|------|--------|-----------|--------|-----------|--------|
| 20   | 113.07 | 3966.0117 | 213600 | 3548.9683 | 0.9892 |
| 20.1 | 113.22 | 4034.1787 | 218300 | 3612.0317 | 0.9892 |
| 20.2 | 113.34 | 4102.5532 | 223000 | 3675.3879 | 0.9892 |
| 20.3 | 113.46 | 4171.3472 | 227800 | 3739.1779 | 0.9892 |
| 20.4 | 113.61 | 4240.8031 | 232700 | 3803.5244 | 0.9893 |
| 20.5 | 113.73 | 4310.6059 | 237600 | 3868.2726 | 0.9894 |
| 20.6 | 113.84 | 4380.992  | 242600 | 3933.5149 | 0.9894 |
| 20.7 | 113.99 | 4451.7881 | 247600 | 3999.2084 | 0.9895 |
| 20.8 | 114.13 | 4524.1128 | 252600 | 4066.2551 | 0.9898 |
| 20.9 | 114.27 | 4595.9436 | 257800 | 4132.9014 | 0.9899 |
| 21   | 114.41 | 4667.7019 | 262900 | 4199.6316 | 0.9899 |
| 21.1 | 114.54 | 4740.4931 | 268200 | 4267.1954 | 0.9900 |
| 21.2 | 114.66 | 4813.1928 | 273400 | 4334.8255 | 0.9901 |
| 21.3 | 114.79 | 4886.3742 | 278800 | 4402.9093 | 0.9901 |
| 21.4 | 114.91 | 4960.2469 | 284200 | 4471.6014 | 0.9902 |
| 21.5 | 115.06 | 5034.9975 | 289600 | 4541.1192 | 0.9904 |
| 21.6 | 115.18 | 5109.4417 | 295100 | 4610.4097 | 0.9905 |
| 21.7 | 115.30 | 5184.6381 | 300600 | 4680.4228 | 0.9907 |
| 21.8 | 115.42 | 5259.9798 | 306200 | 4750.6388 | 0.9907 |
| 21.9 | 115.53 | 5335.6735 | 311900 | 4821.1626 | 0.9908 |
| 22   | 115.67 | 5411.8242 | 317600 | 4892.1045 | 0.9909 |
| 22.1 | 115.78 | 5488.4045 | 323300 | 4963.5657 | 0.9911 |
| 22.2 | 115.89 | 5565.4402 | 329200 | 5035.3346 | 0.9912 |
| 22.3 | 116.90 | 5642.9427 | 335000 | 5107.6749 | 0.9913 |
| 22.4 | 117.04 | 5720.3656 | 340900 | 5179.9695 | 0.9914 |
| 22.5 | 117.19 | 5798.3539 | 346900 | 5252.7472 | 0.9915 |
| 22.6 | 117.32 | 5876.5554 | 352900 | 5325.8613 | 0.9916 |
| 22.7 | 117.45 | 5955.1609 | 359000 | 5399.2667 | 0.9916 |
| 22.8 | 117.59 | 6034.1613 | 365100 | 5473.214  | 0.9917 |
| 22.9 | 117.73 | 6113.5492 | 371200 | 5547.6353 | 0.9918 |
| 23   | 117.84 | 6193.2757 | 377500 | 5621.6975 | 0.9919 |
| 23.1 | 118.00 | 6273.3959 | 383700 | 5696.6671 | 0.9920 |
| 23.2 | 118.52 | 6354.3649 | 390100 | 5772.2765 | 0.9921 |
| 23.3 | 118.67 | 6435.0011 | 396400 | 5848.1801 | 0.9922 |
| 23.4 | 118.80 | 6516.0928 | 402800 | 5923.8586 | 0.9923 |
| 23.5 | 118.95 | 6597.5062 | 409300 | 6000.3225 | 0.9923 |
| 23.6 | 118.91 | 6679.5815 | 415800 | 6077.3148 | 0.9925 |
| 23.7 | 119.07 | 6761.7752 | 422400 | 6153.8211 | 0.9924 |
| 23.8 | 119.18 | 6843.9954 | 429000 | 6231.4237 | 0.9924 |
| 23.9 | 119.31 | 6926.8366 | 435700 | 6308.9595 | 0.9926 |
| 24   | 119.46 | 7009.8227 | 442400 | 6386.6017 | 0.9927 |
| 24.1 | 119.59 | 7093.0975 | 449200 | 6464.98   | 0.9927 |
| 24.2 | 119.71 | 7176.9051 | 456000 | 6543.2557 | 0.9928 |
| 24.3 | 119.85 | 7260.9776 | 462900 | 6622.2436 | 0.9930 |
| 24.4 | 119.98 | 7345.1784 | 469800 | 6701.3218 | 0.9930 |
| 24.5 | 119.87 | 7431.4381 | 476800 | 6782.0789 | 0.9933 |

|      |        |           |        |           |        |
|------|--------|-----------|--------|-----------|--------|
| 24.6 | 120.02 | 7516.3424 | 483800 | 6861.6938 | 0.9934 |
| 24.7 | 120.15 | 7601.6112 | 490800 | 6942.1086 | 0.9935 |
| 24.8 | 120.27 | 7687.2465 | 498000 | 7022.2645 | 0.9937 |
| 24.9 | 120.39 | 7772.8929 | 505100 | 7102.9412 | 0.9937 |
| 25   | 120.53 | 7859.1588 | 512300 | 7184.0987 | 0.9939 |
| 25.1 | 120.66 | 7945.5483 | 519600 | 7265.3245 | 0.9940 |
| 25.2 | 120.79 | 8032.5047 | 526900 | 7347.0101 | 0.9941 |
| 25.3 | 120.89 | 8119.3555 | 534200 | 7428.5939 | 0.9942 |
| 25.4 | 121.32 | 8208.4225 | 541600 | 7512.4886 | 0.9945 |
| 25.5 | 121.46 | 8296.0144 | 549100 | 7594.6282 | 0.9943 |
| 25.6 | 121.59 | 8383.6612 | 556600 | 7677.2839 | 0.9942 |
| 25.7 | 121.72 | 8471.7726 | 564100 | 7760.3134 | 0.9944 |
| 25.8 | 121.87 | 8560.2576 | 571700 | 7843.6229 | 0.9946 |
| 25.9 | 122.00 | 8648.8424 | 579300 | 8331.692  | 0.9944 |

The graph below shows a plot of  $\log k_1$  and  $\log k_{2-3}$  versus  $E_{\text{bin}}$ . The graph shows how at low energies  $k_1$  is dominant (lower) while at high energies  $k_{2-3}$  is dominant (lower). In crude thermodynamic parlance, the change may be understood as resulting from a dominance of “enthalpy” at low energies and “entropy” at high energies. On this log scale, a plot of  $k_{2-3}$  appears identical to that of  $k_2-3$ .

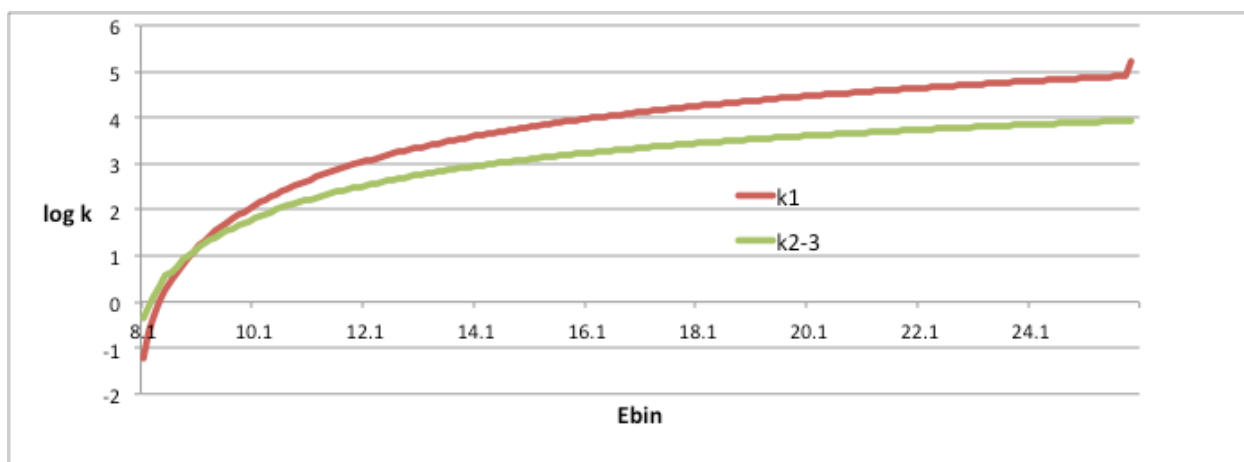

### On the Nature of $6^\ddagger$ , and Trajectory Studies

Structure  $6^\ddagger$  is a potential energy saddle point, and the IRC passing through  $6^\ddagger$  leads from  $3$  to  $3'$ . The normal interpretation of this would be that  $6^\ddagger$  is the transition structure for a concerted isomerization of  $3$  to  $3'$ . This is misleading. Because the dynamical bottlenecks between  $6^\ddagger$  and  $3$  or  $3'$  (for a qualitative picture, see Figure 1 in the main text) are much tighter at 298 than the bottleneck for dissociation into  $1 + 2$ , trajectories that pass into through the hypersurface perpendicular to the IRC through  $6^\ddagger$  would statistically not be expected to pass on to  $3$  or  $3'$ .

This idea was supported by trajectory studies. A series of trajectories were started statistically in the area of  $6^\ddagger$  on the MPW1K/6-31G\* surface. Each normal mode in  $6^\ddagger$  was given

its zero-point energy (ZPE) plus a Boltzmann sampling of additional energy appropriate for 25 °C, with a random phase and sign for its initial velocity. The transition vector was given a Boltzmann sampling of energy in a random direction from the col, and the trajectories were integrated both forward and backward in time until the products **3** / **3'** were formed, separate starting materials **1 + 2** were formed, or a 500 fs time limit was reached. The results were as follows:

|                                                                       |     |
|-----------------------------------------------------------------------|-----|
| trajectories passing between <b>3</b> and <b>3'</b> :                 | 14  |
| trajectories passing between <b>3</b> or <b>3'</b> and <b>1 + 2</b> : | 86  |
| trajectories passing between <b>1 + 2</b> and <b>1 + 2</b> :          | 206 |
| trajectories reaching the time limit:                                 | 4   |
| trajectories starting at <b>3</b> and finishing at <b>3</b> :         | 0   |
| trajectories starting at <b>3'</b> and finishing at <b>3'</b> :       | 0   |

The "normal interpretation" described above would have assumed that all of the trajectories started from **6<sup>‡</sup>** pass between **3** and **3'**. Instead, only 5% do. Two-thirds of the trajectories passing through the area of **6<sup>‡</sup>** are not reactive trajectories and have nothing to do with **3** / **3'**. A smaller portion of trajectories passing through the area of **6<sup>‡</sup>** are doing a different reaction, passing from **1 + 2** to **3** / **3'**.

Overall, while **6<sup>‡</sup>** is the potential energy saddle point on IRC passing from **3** to **3'**, at 25 °C **6<sup>‡</sup>** is irrelevant as a transition state.

The trajectory results with **6<sup>‡</sup>** fit with statistical expectations. If we assume that the outcome of the trajectories would be canonical-statistically governed by the dynamical bottlenecks governing either formation of **3** and **3'** or passage through **5<sup>‡</sup>**, then the energy difference of 1.2 kcal/mol between the pathways would lead to 21% formation of **3** or **3'** (allowing for the factor of 2 for the two pathways) and 79% formation of **1 + 2**. The trajectories predict 19% formation of **3** or **3'** [(28 + 86)/(28 + 86 + 86 + 412)]. In the main text it was noted that the amount of recrossing observed in the trajectories started from **5<sup>‡</sup>** was much less than statistical expectations. The agreement of statistical and trajectory results with **6<sup>‡</sup>** suggests that the disagreement with **5<sup>‡</sup>** is not simply the result of inaccuracy in the trajectories.

It should perhaps be noted that the situation with **6<sup>‡</sup>** is quite different from that observed in the reaction of diphenylketene with cyclopentadiene (reference 6a in the main text). In that case, trajectories started statistically from the area of the transition structure isomerizing the products did in fact pass between the two products. The distinction is important because in reference 6a the recrossing was described as "non-statistical", while the results in the current case could be described (with some reservations as suggested in the main text) as statistical. The differing results of trajectories started from the rearrangement transition structures in the two cases support the different descriptions.

### Microcanonical Variational RRKM Study of the Reaction of **7**

In the main text, a canonical variational TS model was used to locate a variational TS near **8<sup>‡</sup>** and a second variational TS **9<sup>‡</sup>**. This model assumed that the energy distribution at each point along the IRC is canonical for 25 °C. This assumption is surely inexact, because the time scale for the reaction coordinate is not sufficient to allow energy equilibration with solution. To allow for a non-canonical distribution of energy in the area past **8<sup>‡</sup>**, we employed the microcanonical variational RRKM model that we had used to calculate the isotope effects for the

reaction of **1** with **2**. The key assumptions in our model are that the total molecular energy is conserved over the time course of the reaction coordinate past the initial TS **8<sup>‡</sup>**, and that the energy is statistically distributed. For each energy slice out of a canonical energy distribution for 25 °C in **8<sup>‡</sup>**, the RRKM rate constant was calculated at each point along the path leading to the cycloadduct product. At each energy, two RRKM TSs (one near **8<sup>‡</sup>**, the other near **9<sup>‡</sup>**) were defined by points at which the RRKM rate constant was a minimum.

Based on the rate constants at these TSs, 92% of the energy distribution passing through **8<sup>‡</sup>** faces its tightest bottleneck (lowest *k*) at the second TS in the area of **9<sup>‡</sup>**. This supports the idea that the second TS is mainly rate-limiting in this reaction.

## Calculated Structures and Energies

### Transition Structures for the reaction of 1 with 2.

These are listed by method and basis set. When the surface involves two saddle points, these are described as "First saddle point" and "Second saddle point", and the intermediate in between is labeled as "intermediate".

#### HF/3-21G

E(RHF) = -1219.46491561

Zero-point correction= 0.134983 (Hartree/Particle)

Thermal correction to Energy= 0.144478

Thermal correction to Enthalpy= 0.145422

Thermal correction to Gibbs Free Energy= 0.100127

Sum of electronic and ZPE= -1219.329933

Sum of electronic and thermal Energies= -1219.320438

Sum of electronic and thermal Enthalpies= -1219.319493

Sum of electronic and thermal Free Energies= -1219.364789

| E        | CV        | S             |
|----------|-----------|---------------|
| KCal/Mol | Cal/Mol-K | Cal/Mol-K     |
| Total    | 90.661    | 33.866 95.332 |

```

C,0,1.114422697,0.8480132725,-0.4777908159
C,0,2.1250896529,1.5987056039,0.3756541851
H,0,2.7199206826,0.9781736657,1.0179524174
C,0,1.7896442668,2.8725927478,0.9225796818
C,0,3.1479786743,2.4694242106,-0.663033419
O,0,2.7254325074,2.682020573,-1.7958196838
C,0,4.2127977297,2.9837522363,0.0155397703
Cl,0,5.4498355737,3.9016364238,-0.9077421381
Cl,0,4.8267429185,2.4071637258,1.6192606426
C,0,0.7738072676,3.7456829226,0.2804733624
H,0,2.2976757022,3.2106030307,1.8019053746
H,0,0.7603544521,4.7366975081,0.7070011566
H,0,0.9961306784,3.7975300062,-0.7842653225
H,0,-0.2097554809,3.2931596619,0.3832811699
H,0,0.8235572111,1.4357271594,-1.3333592307
H,0,1.5666182929,-0.0649764017,-0.8424119335
H,0,0.2420011738,0.5846356535,0.1097807829

```



**HF/6-31+G\*\***

E(RHF) = -1225.57421853

Zero-point correction= 0.134332 (Hartree/Particle)  
 Thermal correction to Energy= 0.143933  
 Thermal correction to Enthalpy= 0.144877  
 Thermal correction to Gibbs Free Energy= 0.099283  
 Sum of electronic and ZPE= -1225.439887  
 Sum of electronic and thermal Energies= -1225.430286  
 Sum of electronic and thermal Enthalpies= -1225.429342  
 Sum of electronic and thermal Free Energies= -1225.474935

| E            | CV        | S         |
|--------------|-----------|-----------|
| KCal/Mol     | Cal/Mol-K | Cal/Mol-K |
| Total 90.319 | 33.979    | 95.960    |

C,0,1.1475514087,0.8155940104,-0.5042789061  
 C,0,2.091167291,1.6166295812,0.3700926397  
 H,0,2.6728425021,1.0164574056,1.0484148678  
 C,0,1.7647163572,2.896074932,0.8643082078  
 C,0,3.1489179038,2.5156056869,-0.6025643875  
 O,0,2.759639288,2.7268858913,-1.7356076394  
 C,0,4.2917250341,2.9270011461,0.0333679188  
 Cl,0,5.5199943376,3.6956952658,-0.8966589851  
 Cl,0,4.8043225338,2.4535181766,1.6219625702  
 C,0,0.7330279018,3.7879580555,0.2698951548  
 H,0,2.2781963641,3.237800894,1.7426438464  
 H,0,0.8140555336,4.7950548734,0.6541734757  
 H,0,0.8267038978,3.7940971658,-0.8102725023  
 H,0,-0.2499779791,3.3923462884,0.5201738544  
 H,0,0.6555873634,1.4284016529,-1.2430544765  
 H,0,1.7012198794,0.046427298,-1.0271058731  
 H,0,0.4025643828,0.3349936763,0.1235162346

**HF/6-31+G\*\* pcm(THF)**

E(RHF) = -1225.58910344

Zero-point correction= 0.133870 (Hartree/Particle)  
 Thermal correction to Energy= 0.143900  
 Thermal correction to Enthalpy= 0.144845  
 Thermal correction to Gibbs Free Energy= 0.097967  
 Sum of electronic and ZPE= -1225.455234  
 Sum of electronic and thermal Energies= -1225.445203  
 Sum of electronic and thermal Enthalpies= -1225.444259  
 Sum of electronic and thermal Free Energies= -1225.491137

| E            | CV        | S         |
|--------------|-----------|-----------|
| KCal/Mol     | Cal/Mol-K | Cal/Mol-K |
| Total 90.299 | 34.540    | 98.663    |

C,0,1.2101330558,0.7665712028,-0.5730874694  
 C,0,1.9479867551,1.5379388215,0.4630471472  
 H,0,2.6299457769,0.9777674174,1.0757708874  
 C,0,1.7996658718,2.8851774117,0.7517177817

C,0,3.1221509301,2.9423129567,-0.4888120588  
 O,0,2.7207859066,3.2010663243,-1.6079173083  
 C,0,4.3642518682,2.8570480926,0.03984831  
 Cl,0,5.7117620546,3.2844586958,-0.9630677592  
 Cl,0,4.7845243471,2.4903212526,1.6771829761  
 C,0,0.6598540383,3.7499293965,0.2719747352  
 H,0,2.2536549573,3.2129659649,1.6690803473  
 H,0,0.9638064224,4.788604474,0.2609663219  
 H,0,0.3166626422,3.4810811761,-0.7140605822  
 H,0,-0.1611517632,3.6443642471,0.9746473578  
 H,0,0.7856071045,1.3943336254,-1.3397907832  
 H,0,1.8495675696,0.0164415456,-1.0192721983  
 H,0,0.4036024625,0.2501573951,-0.0544557049

**B3LYP/6-31+G\***

E(RB3LYP) = -1228.98459450

Zero-point correction= 0.125363 (Hartree/Particle)  
 Thermal correction to Energy= 0.135862  
 Thermal correction to Enthalpy= 0.136806  
 Thermal correction to Gibbs Free Energy= 0.089062  
 Sum of electronic and ZPE= -1228.859232  
 Sum of electronic and thermal Energies= -1228.848733  
 Sum of electronic and thermal Enthalpies= -1228.847789  
 Sum of electronic and thermal Free Energies= -1228.895533

| E            | CV        | S         |
|--------------|-----------|-----------|
| KCal/Mol     | Cal/Mol-K | Cal/Mol-K |
| Total 85.254 | 36.452    | 100.486   |

C,0,1.2004139497,0.7760880428,-0.5529996217  
 C,0,1.9748968331,1.4941274801,0.4966153352  
 H,0,2.7018188676,0.9343776372,1.0778839835  
 C,0,1.8227433054,2.8578969667,0.7819933165  
 C,0,3.1175811984,2.9780585752,-0.5297093121  
 O,0,2.6715322459,3.2181761653,-1.6422282032  
 C,0,4.3931801457,2.8788284465,-0.0122385829  
 Cl,0,5.7150582037,3.4076774439,-1.0094538112  
 Cl,0,4.8217613092,2.5399214759,1.6460011699  
 C,0,0.6418461911,3.6800358931,0.322744234  
 H,0,2.3103845032,3.2133435767,1.6866013254  
 H,0,0.880498355,4.746973622,0.3554168804  
 H,0,0.3396937125,3.4320770591,-0.6962334623  
 H,0,-0.2041440217,3.4988602045,0.9989461374  
 H,0,1.3026194914,1.3111249475,-1.5105701288  
 H,0,1.5440563963,-0.2531486707,-0.6795042035  
 H,0,0.1288693133,0.7661211343,-0.3094930564

**B3LYP/6-31+G\* pcm(THF)**

E(RB3LYP) = -1228.99274784

Zero-point correction= 0.125094 (Hartree/Particle)  
 Thermal correction to Energy= 0.135909

Thermal correction to Enthalpy= 0.136853  
 Thermal correction to Gibbs Free Energy= 0.088039  
 Sum of electronic and ZPE= -1228.867653  
 Sum of electronic and thermal Energies= -1228.856839  
 Sum of electronic and thermal Enthalpies= -1228.855895  
 Sum of electronic and thermal Free Energies= -1228.904709

E CV S  
 KCal/Mol Cal/Mol-K Cal/Mol-K  
 Total 85.284 36.793 102.737

C,0,1.1854767605,0.7750667098,-0.5560158449  
 C,0,1.9670023991,1.5250519307,0.4727138695  
 H,0,2.683896841,0.96184393,1.0632671828  
 C,0,1.7612255975,2.8544195395,0.8172912443  
 C,0,3.1813177794,2.8985283566,-0.5747576173  
 O,0,2.7321072073,3.1492819011,-1.6824374602  
 C,0,4.4178317821,2.8944613148,0.007530147  
 Cl,0,5.7666655118,3.4514387939,-0.9597251055  
 Cl,0,4.8197510363,2.489993639,1.6530609262  
 C,0,0.6383078405,3.7126574845,0.3115500682  
 H,0,2.2786429185,3.2202036097,1.7000373458  
 H,0,0.9149014587,4.7706072563,0.3329134073  
 H,0,0.3304150024,3.447264524,-0.7014177354  
 H,0,-0.2237427966,3.5786656358,0.9794145699  
 H,0,1.0328755172,1.3786606832,-1.4573315406  
 H,0,1.6833151213,-0.1581734205,-0.8300171285  
 H,0,0.1928200229,0.5305681117,-0.1523043284

### MPW1K/6-31+G\*\*

E(RmPW+HF-PW91) = -1228.91125508

Zero-point correction= 0.128793 (Hartree/Particle)  
 Thermal correction to Energy= 0.139476  
 Thermal correction to Enthalpy= 0.140420  
 Thermal correction to Gibbs Free Energy= 0.091187  
 Sum of electronic and ZPE= -1228.782462  
 Sum of electronic and thermal Energies= -1228.771779  
 Sum of electronic and thermal Enthalpies= -1228.770835  
 Sum of electronic and thermal Free Energies= -1228.820068

E CV S  
 KCal/Mol Cal/Mol-K Cal/Mol-K  
 Total 87.522 35.977 103.621

C,0,-2.4913065465,-0.191493205,1.5059266627  
 C,0,-1.5965828733,0.6628401978,0.6817917688  
 C,0,-1.5965828733,0.6628401978,-0.6817917688  
 C,0,-2.4913065465,-0.191493205,-1.5059266627  
 C,0,-0.0573081075,-0.6984962799,0.  
 C,0,1.0971247845,-0.0072929876,0.  
 Cl,0,1.3131292915,1.6942645086,0.  
 O,0,-0.505957456,-1.8002023592,0.  
 H,0,-0.9986390729,1.4082719702,1.1857346672

H,0,-0.9986390729,1.4082719702,-1.1857346672  
 H,0,-2.2422555148,-0.1269471884,-2.5600104499  
 H,0,-2.4177047308,-1.2330694007,-1.1941619709  
 H,0,-3.5288971499,0.1186567285,-1.3773523453  
 H,0,-2.4177047308,-1.2330694007,1.1941619709  
 H,0,-2.2422555148,-0.1269471884,2.5600104499  
 H,0,-3.5288971499,0.1186567285,1.3773523453  
 Cl,0,2.5476168057,-0.934706976,0.

**MPW1K/6-31G\* (with grid=ultrafine)**

E(RmPW+HF-PW91) = -1228.89194855

Zero-point correction= 0.129716 (Hartree/Particle)  
 Thermal correction to Energy= 0.140249  
 Thermal correction to Enthalpy= 0.141193  
 Thermal correction to Gibbs Free Energy= 0.092038  
 Sum of electronic and ZPE= -1228.762233  
 Sum of electronic and thermal Energies= -1228.751700  
 Sum of electronic and thermal Enthalpies= -1228.750756  
 Sum of electronic and thermal Free Energies= -1228.799910

| E            | CV        | S         |
|--------------|-----------|-----------|
| KCal/Mol     | Cal/Mol-K | Cal/Mol-K |
| Total 88.007 | 35.579    | 103.455   |

C,0,-2.4691518551,-0.2023792042,1.5101504411  
 C,0,-1.5564630465,0.6343072299,0.6871160442  
 C,0,-1.5564630465,0.6343072299,-0.6871160442  
 C,0,-2.4691518551,-0.2023792042,-1.5101504411  
 C,0,-0.1527530228,-0.635276163,0.  
 C,0,1.0347913188,0.0182005348,0.  
 Cl,0,1.2981190995,1.7154001556,0.  
 O,0,-0.5444505618,-1.7703803327,0.  
 H,0,-0.9754866211,1.3948112104,1.1875306613  
 H,0,-0.9754866211,1.3948112104,-1.1875306613  
 H,0,-2.225115742,-0.1313653656,-2.5655991152  
 H,0,-2.3977134658,-1.2456415322,-1.2039478488  
 H,0,-3.5014731174,0.1212198037,-1.3705120649  
 H,0,-2.3977134658,-1.2456415322,1.2039478488  
 H,0,-2.225115742,-0.1313653656,2.5655991152  
 H,0,-3.5014731174,0.1212198037,1.3705120649  
 Cl,0,2.4589349785,-0.9397674844,0.

**m05/6-31+G\*\***

E(RM05) = -1228.78963476

Zero-point correction= 0.125769 (Hartree/Particle)  
 Thermal correction to Energy= 0.136676  
 Thermal correction to Enthalpy= 0.137620  
 Thermal correction to Gibbs Free Energy= 0.088470

Sum of electronic and ZPE= -1228.663866  
 Sum of electronic and thermal Energies= -1228.652959  
 Sum of electronic and thermal Enthalpies= -1228.652015  
 Sum of electronic and thermal Free Energies= -1228.701164

E CV S  
 KCal/Mol Cal/Mol-K Cal/Mol-K  
 Total 85.765 36.963 103.444

C,0,-2.5118877928,-0.1016030547,1.5139944176  
 C,0,-1.5747253432,0.682906591,0.6595567022  
 C,0,-1.5917966283,0.6977165524,-0.7116435143  
 C,0,-2.5180117316,-0.1082858471,-1.555159572  
 C,0,-0.0700494854,-0.7904141661,0.0310473127  
 O,0,-0.6012287449,-1.8638564353,0.0246343833  
 C,0,1.1340159714,-0.1620002445,0.0280248639  
 Cl,0,2.5275627468,-1.1886536068,0.0662714571  
 Cl,0,1.4532416179,1.53236218,0.0169523548  
 H,0,-0.9339314564,1.4033941771,1.1591810613  
 H,0,-0.9378549095,1.4062151533,-1.2113158601  
 H,0,-2.3043726835,0.0175680863,-2.6167330272  
 H,0,-2.4356275826,-1.1722204284,-1.3082375968  
 H,0,-3.5576830881,0.1851547909,-1.3740628653  
 H,0,-2.115470079,-0.2298019758,2.5224494929  
 H,0,-3.4665352135,0.4314571179,1.5946410496  
 H,0,-2.7144755972,-1.0890498901,1.0943703405

**m052x/6-31+G\*\***

E(RM052X) = -1228.89726124

Zero-point correction= 0.126801 (Hartree/Particle)  
 Thermal correction to Energy= 0.137792  
 Thermal correction to Enthalpy= 0.138737  
 Thermal correction to Gibbs Free Energy= 0.088894  
 Sum of electronic and ZPE= -1228.770460  
 Sum of electronic and thermal Energies= -1228.759469  
 Sum of electronic and thermal Enthalpies= -1228.758525  
 Sum of electronic and thermal Free Energies= -1228.808368

E CV S  
 KCal/Mol Cal/Mol-K Cal/Mol-K  
 Total 86.466 36.788 104.903

C,0,-2.4418762643,-0.2941429554,1.5309030294  
 C,0,-1.6431327611,0.6749384914,0.7149818717  
 C,0,-1.7135302661,0.7826999908,-0.6348406962  
 C,0,-2.5921354497,-0.0696763257,-1.5015848254  
 C,0,0.0675752582,-0.7858216408,-0.0822836682  
 O,0,-0.4811604515,-1.8317732752,-0.1295971672  
 C,0,1.1799680269,-0.0410239742,-0.0683497507  
 Cl,0,2.6665767419,-0.9418603103,-0.1388643885  
 Cl,0,1.3407171723,1.6707085028,0.0093583383  
 H,0,-1.0356199715,1.3914154442,1.2566936129  
 H,0,-1.1440267849,1.5717395183,-1.1126226179

H,0,-2.3837972547,-1.1302683478,-1.3355805643  
 H,0,-3.6459068242,0.100079631,-1.2657801198  
 H,0,-2.434903515,0.1516923668,-2.5555070119  
 H,0,-1.8632008885,-0.6517765704,2.3831829339  
 H,0,-3.3332018455,0.2071344818,1.9207827352  
 H,0,-2.7611749221,-1.1531760273,0.9430792888

**m06/6-31+G\*\***

E(RM06) = -1228.71870471

Zero-point correction= 0.124760 (Hartree/Particle)  
 Thermal correction to Energy= 0.135312  
 Thermal correction to Enthalpy= 0.136256  
 Thermal correction to Gibbs Free Energy= 0.088322  
 Sum of electronic and ZPE= -1228.593945  
 Sum of electronic and thermal Energies= -1228.583393  
 Sum of electronic and thermal Enthalpies= -1228.582449  
 Sum of electronic and thermal Free Energies= -1228.630383

| E            | CV        | S         |
|--------------|-----------|-----------|
| KCal/Mol     | Cal/Mol-K | Cal/Mol-K |
| Total 84.909 | 36.785    | 100.886   |

C,0,-2.498318952,-0.1817629434,1.5057652643  
 C,0,-1.5857921754,0.6604436095,0.6866805897  
 C,0,-1.5857029484,0.6606227715,-0.6864575449  
 C,0,-2.4981863632,-0.1813065929,-1.5058891765  
 C,0,-0.0742203952,-0.6890759998,-0.0001042179  
 C,0,1.0997640638,-0.0101199649,0.0001020747  
 Cl,0,1.3509372601,1.7037704804,0.0003604192  
 O,0,-0.5159600879,-1.8065048738,-0.0002977879  
 H,0,-0.9723340919,1.4017941116,1.1955341759  
 H,0,-0.9722301146,1.4021513563,-1.1950313776  
 H,0,-2.3344384979,-0.0338385431,-2.5754379629  
 H,0,-2.3438563135,-1.2443667128,-1.2735568414  
 H,0,-3.5474349297,0.0492424513,-1.2792105945  
 H,0,-2.3438646103,-1.2447507801,1.2731644471  
 H,0,-2.3347380106,-0.0345652892,2.5753761515  
 H,0,-3.5475557423,0.0487474936,1.2789915383  
 Cl,0,2.5477654508,-0.9703964637,0.0000108428

**m062x/6-31+G\*\***

E(RM062X) = -1228.78286075

Zero-point correction= 0.126920 (Hartree/Particle)  
 Thermal correction to Energy= 0.136733  
 Thermal correction to Enthalpy= 0.137677  
 Thermal correction to Gibbs Free Energy= 0.091784  
 Sum of electronic and ZPE= -1228.655941  
 Sum of electronic and thermal Energies= -1228.646128  
 Sum of electronic and thermal Enthalpies= -1228.645184  
 Sum of electronic and thermal Free Energies= -1228.691077

E CV S  
 KCal/Mol Cal/Mol-K Cal/Mol-K  
 Total 85.801 35.363 96.590

C,0,-2.3660334487,-0.2604962812,1.5418154825  
 C,0,-1.5153954304,0.6325166436,0.7125561586  
 C,0,-1.4660221164,0.5418116354,-0.7032448945  
 C,0,-2.5190550494,-0.1971057559,-1.4926946437  
 C,0,-0.2489662477,-0.5461297262,-0.248602563  
 C,0,0.9547690947,0.0701698243,0.0790985783  
 Cl,0,1.2954576034,1.7615089963,-0.0492268983  
 O,0,-0.5353914171,-1.7418333123,-0.2645401846  
 H,0,-0.9656891078,1.4332469836,1.1971352942  
 H,0,-1.0060203199,1.3857645841,-1.2122013671  
 H,0,-2.1431924909,-0.4334726785,-2.4898411677  
 H,0,-2.7925577515,-1.1339795771,-1.0074771713  
 H,0,-3.40572907,0.4367036249,-1.5928535286  
 H,0,-2.1653663969,-1.305109038,1.2640468499  
 H,0,-2.1802959016,-0.1210817958,2.6062756201  
 H,0,-3.4249476742,-0.0663214821,1.3303657051  
 Cl,0,2.3282692662,-0.9261085348,0.32938873

**m062x/6-31+G\*\* pcm(THF) first saddle point**

E(RM062X) = -1228.79017767

Zero-point correction= 0.125995 (Hartree/Particle)  
 Thermal correction to Energy= 0.136927  
 Thermal correction to Enthalpy= 0.137871  
 Thermal correction to Gibbs Free Energy= 0.088325  
 Sum of electronic and ZPE= -1228.664183  
 Sum of electronic and thermal Energies= -1228.653251  
 Sum of electronic and thermal Enthalpies= -1228.652307  
 Sum of electronic and thermal Free Energies= -1228.701852

E CV S  
 KCal/Mol Cal/Mol-K Cal/Mol-K  
 Total 85.923 36.913 104.277

C,0,-2.4407243628,-0.2966633486,1.5324064606  
 C,0,-1.658174269,0.6862189988,0.7182506564  
 C,0,-1.7294803399,0.7956057806,-0.6307919893  
 C,0,-2.597355956,-0.0631637221,-1.5016891931  
 C,0,0.0945357975,-0.8037869865,-0.0869366192  
 O,0,-0.4676718499,-1.8405571025,-0.1317283119  
 C,0,1.2003388925,-0.0510673051,-0.071613917  
 Cl,0,2.6935147772,-0.9508779221,-0.1360626808  
 Cl,0,1.3491832308,1.660648038,-0.0021486359  
 H,0,-1.0543640573,1.407586755,1.2643462929  
 H,0,-1.1687811182,1.5940250483,-1.1106325325  
 H,0,-2.4185363284,-1.1268360247,-1.307075704  
 H,0,-3.6565071958,0.1284226189,-1.2974264849  
 H,0,-2.4110521256,0.1312062277,-2.5584437549  
 H,0,-1.8597290962,-0.6449711247,2.3901299958  
 H,0,-3.3444840295,0.1867559821,1.9217995041

H,0,-2.7495419694,-1.1616569131,0.9415879138

**m062x/6-31+G\*\* pcm(THF) second saddle point**

E(RM062X) = -1228.79238063

Zero-point correction= 0.126980 (Hartree/Particle)

Thermal correction to Energy= 0.136735

Thermal correction to Enthalpy= 0.137680

Thermal correction to Gibbs Free Energy= 0.091810

Sum of electronic and ZPE= -1228.665401

Sum of electronic and thermal Energies= -1228.655645

Sum of electronic and thermal Enthalpies= -1228.654701

Sum of electronic and thermal Free Energies= -1228.700570

E CV S

KCal/Mol Cal/Mol-K Cal/Mol-K

Total 85.803 35.242 96.540

C,0,-2.3697835451,-0.2652900743,1.5473744676  
 C,0,-1.5165181857,0.6173162961,0.7137407515  
 C,0,-1.4611802938,0.5247942163,-0.7042089706  
 C,0,-2.5166780782,-0.2077694138,-1.4961892194  
 C,0,-0.2443040886,-0.5303062943,-0.2501204071  
 C,0,0.9580007799,0.086146729,0.0683353303  
 Cl,0,1.2948473501,1.7759054352,-0.0351737274  
 O,0,-0.501868249,-1.7444296271,-0.271471994  
 H,0,-0.974089326,1.4237905943,1.1974655049  
 H,0,-1.0136237866,1.3775916819,-1.2097304252  
 H,0,-2.129973239,-0.4724550392,-2.4818986719  
 H,0,-2.834766215,-1.1211013432,-0.9944622946  
 H,0,-3.3795202699,0.4521058559,-1.6250522775  
 H,0,-2.2370258888,-1.309280091,1.2381699737  
 H,0,-2.145211177,-0.1586053523,2.6076059  
 H,0,-3.4222365121,-0.006994658,1.3730324294  
 Cl,0,2.3377642666,-0.911334805,0.3225836301

**m062x/6-31+G\*\* pcm(THF) intermediate**

E(RM062X) = -1228.79257705

Zero-point correction= 0.127140 (Hartree/Particle)

Thermal correction to Energy= 0.138035

Thermal correction to Enthalpy= 0.138979

Thermal correction to Gibbs Free Energy= 0.090250

Sum of electronic and ZPE= -1228.665437

Sum of electronic and thermal Energies= -1228.654543

Sum of electronic and thermal Enthalpies= -1228.653598

Sum of electronic and thermal Free Energies= -1228.702327

E CV S

KCal/Mol Cal/Mol-K Cal/Mol-K

Total 86.618 37.739 102.559



C,0,1.2309646668,0.8274518535,-0.5851982959  
 C,0,2.0929891493,1.5704872776,0.3881001792  
 C,0,1.7961627042,2.842839392,0.8754178938  
 C,0,0.6270539942,3.6543980838,0.4235525168  
 C,0,3.0765160747,2.8182588596,-0.5769688198  
 C,0,4.3327583924,2.9578870015,-0.0478847085  
 Cl,0,4.8528055333,2.497118926,1.5326563445  
 O,0,2.6002631586,3.0976276266,-1.67560093  
 Cl,0,5.5680639614,3.604890003,-1.0665802721  
 H,0,2.8271851359,0.9854049465,0.9350423556  
 H,0,2.3508473576,3.1922950849,1.7413820678  
 H,0,0.7052042268,4.6829655556,0.7751526679  
 H,0,0.5527326637,3.6477428319,-0.667045467  
 H,0,-0.2884331419,3.2095600522,0.83000306  
 H,0,1.8282118727,0.1329208644,-1.1781234012  
 H,0,0.4983501044,0.2491043167,-0.0115110949  
 H,0,0.6999091459,1.5034803243,-1.2546330961

### MP2/6-31+G\*\*

-0.1311210389D+01 EUMP2

Zero-point correction= 0.127845 (Hartree/Particle)  
 Thermal correction to Energy= 0.138482  
 Thermal correction to Enthalpy= 0.139426  
 Thermal correction to Gibbs Free Energy= 0.090312  
 Sum of electronic and ZPE= -1226.757128  
 Sum of electronic and thermal Energies= -1226.746491  
 Sum of electronic and thermal Enthalpies= -1226.745547  
 Sum of electronic and thermal Free Energies= -1226.794661

| E            | CV        | S         |
|--------------|-----------|-----------|
| KCal/Mol     | Cal/Mol-K | Cal/Mol-K |
| Total 86.899 | 36.130    | 103.370   |

C,0,-2.4764475718,-0.203927326,1.5116305209  
 C,0,-1.5475474464,0.6322024601,0.6928273883  
 C,0,-1.5469489883,0.6300239192,-0.6950339328  
 C,0,-2.475202851,-0.208603199,-1.5120179231  
 C,0,-0.148710285,-0.641073443,0.0013872797  
 C,0,1.0481513826,0.0310373296,0.0008645133  
 Cl,0,1.2914958052,1.7383151157,-0.0016693061  
 O,0,-0.5348141111,-1.8033448274,0.0030300217  
 H,0,-0.9725461314,1.3992860605,1.1960562598  
 H,0,-0.9715435537,1.3955495857,-1.2001706231  
 H,0,-2.2211157913,-0.1552111973,-2.5680625812  
 H,0,-2.4264057144,-1.2500584399,-1.1888833935  
 H,0,-3.5017975986,0.1413490724,-1.3803400026  
 H,0,-2.427019552,-1.2464442752,1.1920200649  
 H,0,-2.2234924365,-0.1469398412,2.5677579178  
 H,0,-3.5030037482,0.1452766428,1.3776930799  
 Cl,0,2.4807821338,-0.9273535266,0.002910716

**mpwlyp/6-31+G\*\***

E(RmPW+HF-LYP) = -1229.00679093

Zero-point correction= 0.124886 (Hartree/Particle)  
 Thermal correction to Energy= 0.135410  
 Thermal correction to Enthalpy= 0.136355  
 Thermal correction to Gibbs Free Energy= 0.088512  
 Sum of electronic and ZPE= -1228.881905  
 Sum of electronic and thermal Energies= -1228.871381  
 Sum of electronic and thermal Enthalpies= -1228.870436  
 Sum of electronic and thermal Free Energies= -1228.918279

| E            | CV        | S         |
|--------------|-----------|-----------|
| KCal/Mol     | Cal/Mol-K | Cal/Mol-K |
| Total 84.971 | 36.531    | 100.693   |

C,0,-2.4642386658,-0.2284077586,1.5716288721  
 C,0,-1.6062265281,0.6629795695,0.7462127847  
 C,0,-1.5059744181,0.5703374108,-0.6479124174  
 C,0,-2.485156373,-0.1960591211,-1.5025223372  
 C,0,-0.1616547682,-0.6058953531,-0.1693776042  
 C,0,1.048658403,0.0331565958,-0.0011212201  
 Cl,0,1.3335104299,1.7539460311,-0.0601301128  
 O,0,-0.5100367877,-1.7775155583,-0.165655058  
 H,0,-1.0223652693,1.4306466435,1.2445115238  
 H,0,-0.9919826934,1.3885926594,-1.1450360937  
 H,0,-2.0607519738,-0.39235175,-2.4899378699  
 H,0,-2.7552443926,-1.152689278,-1.0537540088  
 H,0,-3.3927395408,0.4054039565,-1.6343282211  
 H,0,-2.2159488874,-1.2771483436,1.3456047553  
 H,0,-2.32882166,-0.049200264,2.6393094083  
 H,0,-3.5235959997,-0.093856209,1.3178463714  
 Cl,0,2.4864026668,-0.9418551204,0.0046612275

**VRI for the reaction of 1 with 2.**

This is the valley-ridge inflection point for the reaction of **1** with **2**, obtained by following the IRC forward from the symmetrical transition structure in the MPW1K calculations until an orthogonal frequency most closely approached 0.

MPW1K/6-31+G\*\*

E(RmPW+HF-PW91) = -1228.91144852

Zero-point correction= 0.128809 (Hartree/Particle)  
 Thermal correction to Energy= 0.139440  
 Thermal correction to Enthalpy= 0.140385  
 Thermal correction to Gibbs Free Energy= 0.089352  
 Sum of electronic and ZPE= -1228.782639  
 Sum of electronic and thermal Energies= -1228.772008  
 Sum of electronic and thermal Enthalpies= -1228.771064  
 Sum of electronic and thermal Free Energies= -1228.822096

| E            | CV        | S         |
|--------------|-----------|-----------|
| KCal/Mol     | Cal/Mol-K | Cal/Mol-K |
| Total 87.500 | 35.766    | 107.407   |

6 1.495821 1.968062 1.507230  
 6 1.495821 0.728605 0.687076  
 6 1.495821 0.728605 -0.687076  
 6 1.495821 1.968062 -1.507230  
 6 -0.400428 0.528032 0.000000  
 6 -0.708653 -0.791996 0.000000  
 17 0.385391 -2.115450 0.000000  
 8 -0.978501 1.581307 0.000000  
 1 1.666476 -0.213384 1.187583  
 1 1.666476 -0.213384 -1.187583  
 1 1.381976 1.743830 -2.562575  
 1 0.682482 2.623800 -1.198599  
 1 2.433385 2.506476 -1.365462  
 1 0.682482 2.623800 1.198599  
 1 1.381976 1.743830 2.562575  
 1 2.433385 2.506476 1.365462  
 17 -2.370441 -1.222675 0.000000

### Structure 6<sup>+</sup>

MPW1K/6-31+G\*\*

E(RmPW+HF-PW91) = -1228.91188370

Zero-point correction= 0.129296 (Hartree/Particle)

Thermal correction to Energy= 0.139492

Thermal correction to Enthalpy= 0.140436

Thermal correction to Gibbs Free Energy= 0.093179

Sum of electronic and ZPE= -1228.782588

Sum of electronic and thermal Energies= -1228.772392

Sum of electronic and thermal Enthalpies= -1228.771448

Sum of electronic and thermal Free Energies= -1228.818705

| E        | CV        | S             |
|----------|-----------|---------------|
| KCal/Mol | Cal/Mol-K | Cal/Mol-K     |
| Total    | 87.532    | 35.364 99.461 |

C,0,-2.4510110458,-0.2183519891,1.5236051265  
 C,0,-1.5185346745,0.5904561429,0.6934656135  
 C,0,-1.517993897,0.5872171105,-0.6967837836  
 C,0,-2.4496189849,-0.2257061951,-1.5238334044  
 C,0,-0.228402671,-0.5664875811,0.0018486346  
 C,0,0.9907530229,0.0574154575,0.000873033  
 Cl,0,1.2767431353,1.7502383918,-0.0031893639  
 O,0,-0.5526843276,-1.7411036679,0.0045748902  
 H,0,-0.9711475082,1.3828128921,1.1827279819  
 H,0,-0.970087507,1.3771826217,-1.1893198761  
 H,0,-2.1559345667,-0.2123745985,-2.5683966213  
 H,0,-2.462402618,-1.2563062107,-1.1768822267  
 H,0,-3.4574688861,0.1820478028,-1.4408764508  
 H,0,-2.4636179065,-1.2506308589,1.1816853218  
 H,0,-2.1582805048,-0.1999585307,2.5683590773  
 H,0,-3.4587248672,0.189130799,1.4377402019  
 Cl,0,2.3922473488,-0.915497476,0.0044018459

**Cyclobutanone Product 3 / 3'**

MPW1K/6-31+G\*\*

E(RmPW+HF-PW91) = -1228.99719575

Zero-point correction= 0.133228 (Hartree/Particle)

Thermal correction to Energy= 0.142798

Thermal correction to Enthalpy= 0.143742

Thermal correction to Gibbs Free Energy= 0.098011

Sum of electronic and ZPE= -1228.863968

Sum of electronic and thermal Energies= -1228.854397

Sum of electronic and thermal Enthalpies= -1228.853453

Sum of electronic and thermal Free Energies= -1228.899185

|       | E        | CV        | S         |
|-------|----------|-----------|-----------|
|       | KCal/Mol | Cal/Mol-K | Cal/Mol-K |
| Total | 89.607   | 34.113    | 96.251    |

|    |           |           |           |
|----|-----------|-----------|-----------|
| 6  | -0.986648 | 1.917236  | -0.726862 |
| 6  | -0.561453 | 0.488427  | -0.979065 |
| 1  | -0.351552 | 0.333893  | -2.033432 |
| 6  | -1.488129 | -0.595374 | -0.345881 |
| 6  | -0.483423 | -0.707117 | 0.782053  |
| 8  | -0.525977 | -1.030171 | 1.922800  |
| 6  | 0.593828  | -0.011158 | -0.071098 |
| 17 | 1.618060  | 1.158242  | 0.734716  |
| 17 | 1.574892  | -1.245093 | -0.892378 |
| 6  | -2.926818 | -0.301691 | 0.005906  |
| 1  | -1.421687 | -1.507861 | -0.940862 |
| 1  | -3.348105 | -1.133835 | 0.564548  |
| 1  | -3.018867 | 0.589390  | 0.621320  |
| 1  | -3.523738 | -0.161671 | -0.892822 |
| 1  | -1.160298 | 2.118252  | 0.328464  |
| 1  | -0.224523 | 2.610325  | -1.073183 |
| 1  | -1.907748 | 2.127391  | -1.266501 |

**Cis-2-butene (1) Starting Material**

Structures for cis-2-butene were calculated at all of the levels used for the transition structures. We provide here a single example.

MPW1K/6-31+G\*\*

E(RmPW+HF-PW91) = -157.198685414

Zero-point correction= 0.110986 (Hartree/Particle)

Thermal correction to Energy= 0.116456

Thermal correction to Enthalpy= 0.117400

Thermal correction to Gibbs Free Energy= 0.083138

Sum of electronic and ZPE= -157.087700

Sum of electronic and thermal Energies= -157.082229

Sum of electronic and thermal Enthalpies= -157.081285

Sum of electronic and thermal Free Energies= -157.115548

|       | E        | CV        | S         |
|-------|----------|-----------|-----------|
|       | KCal/Mol | Cal/Mol-K | Cal/Mol-K |
| Total | 73.077   | 17.826    | 72.112    |

C,0,1.0924978651,0.7779415164,-0.3096367879  
 C,0,2.070746273,1.4842343855,0.567810653  
 C,0,2.2065271902,2.796016635,0.7451247217  
 C,0,1.4146078889,3.8898552359,0.1109993694  
 H,0,2.7439842145,0.8388327899,1.1199191464  
 H,0,2.9805777756,3.1245589336,1.4288803414  
 H,0,0.9222016216,4.4982231061,0.8701666947  
 H,0,2.0653103818,4.5587533265,-0.4529792886  
 H,0,0.6501927309,3.5205153655,-0.5662987634  
 H,0,0.4672752857,0.103495103,0.2761357595  
 H,0,0.4367556843,1.4582061364,-0.8450969859  
 H,0,1.6104140885,0.1639494662,-1.0469878601

## Dichloroketene (2) Starting Material

Structures for **2** were calculated at all of the levels used for the transition structures. We provide here a single example.

MPW1K/6-31+G\*\*

E(RmPW+HF-PW91) = -1071.72174242

Zero-point correction= 0.016271 (Hartree/Particle)

Thermal correction to Energy= 0.021228

Thermal correction to Enthalpy= 0.022173

Thermal correction to Gibbs Free Energy= -0.013388

Sum of electronic and ZPE= -1071.705471

Sum of electronic and thermal Energies= -1071.700514

Sum of electronic and thermal Enthalpies= -1071.699570

Sum of electronic and thermal Free Energies= -1071.735130

| E            | CV        | S         |
|--------------|-----------|-----------|
| KCal/Mol     | Cal/Mol-K | Cal/Mol-K |
| Total 13.321 | 15.071    | 74.843    |

Cl,0,1.1394989217,1.1790502808,-0.4430569264  
 Cl,0,2.7524527893,1.732220456,1.9813664815  
 C,0,2.0273643984,0.6130482833,0.9072787553  
 C,0,2.1521448582,-0.6774992247,1.1185386062  
 O,0,2.2618600324,-1.8131217954,1.3042120834

## Starting Material Complex Used for RRKM Calculations on 1 + 2

This loose reactant complex is not kinetically significant and its energetics cancel out in the relevant RRKM calculations used in the main text. Its choice as the formal starting material for RRKM calculations was solely to make the calculations convenient.

MPW1K/6-31+G\*\*

E(RmPW+HF-PW91) = -1228.92152325

Zero-point correction= 0.127628 (Hartree/Particle)

Thermal correction to Energy= 0.140548

Thermal correction to Enthalpy= 0.141492

Thermal correction to Gibbs Free Energy= 0.079397

Sum of electronic and ZPE= -1228.793896

Sum of electronic and thermal Energies= -1228.780975

Sum of electronic and thermal Enthalpies= -1228.780031

Sum of electronic and thermal Free Energies= -1228.842126

|       | E        | CV        | S         |
|-------|----------|-----------|-----------|
|       | KCal/Mol | Cal/Mol-K | Cal/Mol-K |
| Total | 88.195   | 38.827    | 130.689   |

|    |           |           |           |
|----|-----------|-----------|-----------|
| 6  | -2.061176 | 1.754334  | -0.924882 |
| 6  | -2.075067 | 0.280315  | -1.155289 |
| 6  | -2.689991 | -0.651480 | -0.430065 |
| 6  | -3.518573 | -0.457274 | 0.794994  |
| 6  | 0.677639  | -0.162809 | 1.251337  |
| 6  | 1.525954  | -0.171891 | 0.248048  |
| 17 | 1.560046  | -1.486605 | -0.846536 |
| 8  | -0.062304 | -0.141973 | 2.138626  |
| 1  | -1.518697 | -0.056009 | -2.022449 |
| 1  | -2.589530 | -1.678949 | -0.760700 |
| 1  | -3.099715 | -1.010756 | 1.635572  |
| 1  | -3.597645 | 0.584359  | 1.091284  |
| 1  | -4.528200 | -0.838058 | 0.638593  |
| 1  | -2.593294 | 2.046946  | -0.024580 |
| 1  | -1.037806 | 2.122016  | -0.844305 |
| 1  | -2.514601 | 2.279016  | -1.766452 |
| 17 | 2.606143  | 1.141902  | 0.037075  |

### Transition Structures for the Reaction of 7 with Cyclopentadiene

A total of 16 transition states were searched. Following the convention of Gordillio and Houk (*J. Am. Chem. Soc.* **2006**, *128*, 3543-3553), they are named as follows:

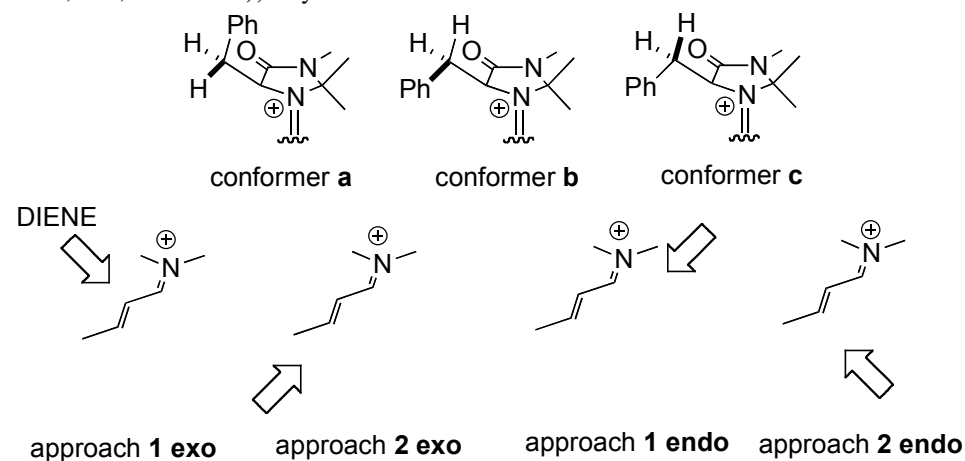

#### Structure: E\_a1\_endo

B3LYP/6-31(g), gas phase  
E(RB3LYP) = -1232.00386564

1 imaginary frequency.

Zero-point correction= 0.522204 (Hartree/Particle)  
Thermal correction to Energy= 0.549723  
Thermal correction to Enthalpy= 0.550667

Thermal correction to Gibbs Free Energy= 0.462372  
 Sum of electronic and ZPE= -1231.481661  
 Sum of electronic and thermal Energies= -1231.454143  
 Sum of electronic and thermal Enthalpies= -1231.453199  
 Sum of electronic and thermal Free Energies= -1231.541493

|       | E             | CV            | S             |
|-------|---------------|---------------|---------------|
|       | KCal/Mol      | Cal/Mol-K     | Cal/Mol-K     |
| Total | 344.956       | 107.950       | 185.831       |
| C     | -3.3498016277 | 2.2367800477  | 0.6639257443  |
| C     | -1.9744597634 | 1.9600954715  | 0.6197727954  |
| C     | -1.1962489576 | 2.5714543440  | -0.3729503568 |
| C     | -1.7769526536 | 3.4277478031  | -1.3104296117 |
| C     | -3.1481996199 | 3.6851446597  | -1.2663774192 |
| C     | -3.9317599231 | 3.0903006492  | -0.2746041465 |
| C     | -1.3395277944 | 1.0191984673  | 1.6208689205  |
| C     | -1.5097070824 | -0.4946106157 | 1.3080546896  |
| N     | -1.1362735536 | -0.9353368677 | -0.0408693942 |
| C     | -2.2983599704 | -1.4948225438 | -0.8148275219 |
| N     | -3.3476151285 | -1.4511204838 | 0.2043734460  |
| C     | -2.9772364249 | -0.9076840016 | 1.4001540766  |
| C     | 0.1058655265  | -0.9495874423 | -0.5205818050 |
| O     | -3.6806952545 | -0.7452634644 | 2.3805930417  |
| C     | -4.7166516273 | -1.8795657694 | -0.0440218199 |
| C     | -2.6297397385 | -0.6059325137 | -2.0234118879 |
| C     | -2.0179134463 | -2.9456093951 | -1.2420315599 |
| C     | 1.2696079263  | -0.5736050019 | 0.1369660972  |
| C     | 2.5261462356  | -0.3900229210 | -0.5700104484 |
| C     | 3.5974245868  | -1.8673694264 | -0.2964737620 |
| C     | 3.0888978701  | -2.8719699402 | -1.1844177564 |
| C     | 2.0673088312  | -3.5924266360 | -0.5557662731 |
| C     | 1.9941194997  | -3.1819027967 | 0.7706516360  |
| C     | 3.1935497081  | -2.3547950455 | 1.0940609437  |
| H     | 1.4193948872  | -4.3209240011 | -1.0297614693 |
| H     | 3.3803022142  | -2.9778287758 | -2.2248741659 |
| H     | 4.6003573271  | -1.4824263051 | -0.4594910572 |
| H     | 1.2811185216  | -3.5409384067 | 1.5050990585  |
| H     | 3.0570315440  | -1.5915126155 | 1.8596639222  |
| H     | 3.9856663539  | -3.0332785439 | 1.4531131374  |
| H     | 2.3997475661  | -0.4081543226 | -1.6521552562 |
| H     | 1.2053571268  | -0.2518008982 | 1.1684337051  |
| H     | -4.7599015289 | -2.9396640279 | -0.3134289371 |
| H     | -5.1812091689 | -1.2852295034 | -0.8374465762 |
| H     | -5.2674136821 | -1.7258237019 | 0.8850854252  |
| H     | -1.7916080820 | -0.5850726408 | -2.7278615588 |
| H     | -3.4945035660 | -1.0081688245 | -2.5595253762 |
| H     | -2.8493271016 | 0.4154102340  | -1.7058177430 |
| H     | -2.9063284183 | -3.3725816627 | -1.7155605713 |
| H     | -1.2092042683 | -2.9964373935 | -1.9776591793 |
| H     | -1.7579611627 | -3.5602605216 | -0.3749581502 |
| H     | -0.9389231114 | -1.0688555551 | 2.0511105167  |
| H     | -0.2751449735 | 1.2507188754  | 1.7237750734  |
| H     | -1.7907574210 | 1.1450643650  | 2.6115801111  |
| H     | -0.1239032259 | 2.3894739995  | -0.4032102542 |
| H     | -1.1574308035 | 3.9015209229  | -2.0669968305 |

|   |               |               |               |
|---|---------------|---------------|---------------|
| H | -3.6011588230 | 4.3566742527  | -1.9901374761 |
| H | -4.9961306548 | 3.3017204076  | -0.2219703018 |
| H | -3.9624829220 | 1.7884175554  | 1.4414521073  |
| H | 0.1887650883  | -1.2790940795 | -1.5540124672 |
| C | 3.4035194602  | 0.7711406575  | -0.1768506156 |
| C | 4.1341759781  | 1.4256603096  | -1.1806393183 |
| C | 3.5353814750  | 1.2162418640  | 1.1477576218  |
| C | 4.9666777044  | 2.5010768804  | -0.8734865052 |
| H | 4.0446074414  | 1.0951853827  | -2.2132267964 |
| C | 4.3698342431  | 2.2898913952  | 1.4556880074  |
| H | 2.9836616813  | 0.7385742769  | 1.9530213661  |
| C | 5.0883697033  | 2.9355831167  | 0.4470899099  |
| H | 5.5168070587  | 2.9995476358  | -1.6660813442 |
| H | 4.4554672456  | 2.6247808793  | 2.4852300972  |
| H | 5.7363586756  | 3.7723621922  | 0.6896422627  |

**Structure: E\_al\_exo**

B3LYP/6-31(g), gas phase

E(RB3LYP) = -1232.00508896

1 imaginary frequency.

Zero-point correction= 0.521904 (Hartree/Particle)

Thermal correction to Energy= 0.549529

Thermal correction to Enthalpy= 0.550473

Thermal correction to Gibbs Free Energy= 0.461603

Sum of electronic and ZPE= -1231.483185

Sum of electronic and thermal Energies= -1231.455560

Sum of electronic and thermal Enthalpies= -1231.454616

Sum of electronic and thermal Free Energies= -1231.543486

|       | E        | CV        | S         |
|-------|----------|-----------|-----------|
|       | KCal/Mol | Cal/Mol-K | Cal/Mol-K |
| Total | 344.835  | 108.149   | 187.043   |

|   |               |               |               |
|---|---------------|---------------|---------------|
| C | -3.4495911772 | 2.0936265036  | 0.9422177187  |
| C | -2.0733444875 | 1.8538752332  | 0.8079908440  |
| C | -1.3479829861 | 2.6000305191  | -0.1313784513 |
| C | -1.9818822607 | 3.5542365776  | -0.9293571842 |
| C | -3.3538936557 | 3.7755983486  | -0.7970208519 |
| C | -4.0848067304 | 3.0451562962  | 0.1429508746  |
| C | -1.3808163788 | 0.8130163698  | 1.6607417177  |
| C | -1.5094349909 | -0.6543307328 | 1.1607117792  |
| N | -1.1420002021 | -0.9150718526 | -0.2348015993 |
| C | -2.3011120594 | -1.3934064368 | -1.0646172293 |
| N | -3.3381153325 | -1.5075223639 | -0.0382749824 |
| C | -2.9635254347 | -1.1185360149 | 1.2151128799  |
| C | 0.1027002945  | -0.8718202211 | -0.7104675807 |
| O | -3.6565906843 | -1.1061920310 | 2.2163186541  |
| C | -4.7025852308 | -1.9236439926 | -0.3283334199 |
| C | -2.6648939163 | -0.3604859298 | -2.1422893931 |
| C | -1.9994410422 | -2.7691423754 | -1.6837948837 |
| C | 1.2582632451  | -0.5454369267 | -0.0161134766 |



|   |               |               |               |
|---|---------------|---------------|---------------|
| C | 2.5224220979  | -0.3810289966 | -0.6894883894 |
| C | 3.5639046764  | -1.9599759875 | -0.4591734303 |
| C | 2.5753938061  | -3.0767412323 | -0.7756256610 |
| C | 1.9572808654  | -3.3235417151 | 0.5612367007  |
| C | 2.7850206963  | -2.8246097225 | 1.5482838566  |
| C | 3.8080211511  | -2.0725972195 | 0.9373323253  |
| H | -5.1781061577 | -1.2482280651 | -1.0467272878 |
| H | -4.7347736805 | -2.9465244340 | -0.7167726807 |
| H | -5.2499219002 | -1.8845111880 | 0.6145696228  |
| H | -2.9047850660 | 0.6039363982  | -1.6900783274 |
| H | -3.5245816270 | -0.7079066910 | -2.7233062012 |
| H | -1.8324949725 | -0.2252982101 | -2.8409366340 |
| H | -2.8883276058 | -3.1506504117 | -2.1940200431 |
| H | -1.2061399219 | -2.7071014374 | -2.4353761612 |
| H | -0.9080853779 | -1.2975780151 | 1.8184007180  |
| H | -1.8081447257 | 0.7939210286  | 2.6695782403  |
| H | -0.3222193471 | 1.0680238008  | 1.7676319675  |
| H | -4.0209651924 | 1.5381260280  | 1.6810533487  |
| H | -5.1492448428 | 3.2254722015  | 0.2644833348  |
| H | -3.8479074255 | 4.5224593716  | -1.4119230264 |
| H | -1.4032830254 | 4.1310223680  | -1.6457285605 |
| H | -0.2753770727 | 2.4444964423  | -0.2290285419 |
| H | -1.7103891815 | -3.4875366587 | -0.9105669317 |
| H | 2.6554534293  | -2.9613454015 | 2.6158265742  |
| H | 4.6103860593  | -1.5683782011 | 1.4642960582  |
| H | 2.4330284131  | -0.4747557622 | -1.7737106798 |
| H | 4.3901234114  | -1.7489024752 | -1.1334258678 |
| H | 1.1888721592  | -0.2926251307 | 1.0341714488  |
| H | 1.0642748334  | -3.9174478639 | 0.7228776494  |
| H | 3.1624915357  | -3.9683927978 | -1.0526551878 |
| H | 1.8738242588  | -2.8935077728 | -1.5911242802 |
| H | 0.1892915995  | -1.0975332988 | -1.7710448828 |
| C | 3.4296095419  | 0.7554900394  | -0.3248367912 |
| C | 4.1817671174  | 1.3651600483  | -1.3400466472 |
| C | 3.5542909435  | 1.2383670304  | 0.9874314251  |
| C | 5.0307072968  | 2.4355945905  | -1.0563782468 |
| H | 4.0966148658  | 1.0054595623  | -2.3633417727 |
| C | 4.4028561930  | 2.3060152451  | 1.2718174026  |
| H | 2.9894098427  | 0.7845403502  | 1.7978043020  |
| C | 5.1437712755  | 2.9086906581  | 0.2506290195  |
| H | 5.6003888467  | 2.8980445050  | -1.8568851792 |
| H | 4.4844817749  | 2.6713926780  | 2.2913259804  |
| H | 5.8038914614  | 3.7409623717  | 0.4754000212  |

**Structure: E\_a2\_endo**

B3LYP/6-31(g), gas phase  
E(RB3LYP) = -1232.00090185

1 imaginary frequency.

Zero-point correction= 0.522480 (Hartree/Particle)  
Thermal correction to Energy= 0.549884  
Thermal correction to Enthalpy= 0.550828

Thermal correction to Gibbs Free Energy= 0.463256  
 Sum of electronic and ZPE= -1231.478422  
 Sum of electronic and thermal Energies= -1231.451018  
 Sum of electronic and thermal Enthalpies= -1231.450074  
 Sum of electronic and thermal Free Energies= -1231.537646

|       | E             | CV            | S             |
|-------|---------------|---------------|---------------|
|       | KCal/Mol      | Cal/Mol-K     | Cal/Mol-K     |
| Total | 345.057       | 107.877       | 184.311       |
| C     | -1.2710508871 | 2.8639350291  | 1.7055625144  |
| C     | -2.5422456591 | 2.3898709151  | 2.0452829926  |
| C     | -3.2331747541 | 1.9392778040  | 0.8677454085  |
| C     | -2.7941269359 | 0.1948907314  | 0.6750515895  |
| C     | -1.4523749297 | 0.0564396139  | 0.1143412887  |
| C     | -1.1707245379 | 2.8873592924  | 0.3197611474  |
| C     | -2.5142077777 | 2.6497573738  | -0.2797590873 |
| C     | -0.3919866933 | -0.3701917447 | 0.8996318851  |
| N     | 0.7920074328  | -0.8369679556 | 0.4914254549  |
| C     | 1.1525611957  | -1.0355397788 | -0.9173183544 |
| C     | 2.3504485069  | -1.9765517042 | -0.8344616568 |
| N     | 2.6536609637  | -2.1644176177 | 0.4832225263  |
| C     | 1.7472482595  | -1.5201065285 | 1.4354806920  |
| O     | 2.9379325361  | -2.4372334524 | -1.7961072217 |
| C     | 3.7990248547  | -2.9639394259 | 0.8927266274  |
| C     | 1.5036957784  | 0.2415746256  | -1.7286049078 |
| C     | 2.7434476411  | 0.9951470020  | -1.2910845949 |
| C     | 2.6706588440  | 2.0189478495  | -0.3363522702 |
| C     | 3.8114482918  | 2.7237317241  | 0.0530135246  |
| C     | 5.0490011512  | 2.4116764000  | -0.5123270706 |
| C     | 5.1354403176  | 1.3948917521  | -1.4650254469 |
| C     | 3.9930890825  | 0.6930494292  | -1.8522064070 |
| C     | 1.0181856844  | -2.5768578944 | 2.2849373200  |
| C     | 2.4713441268  | -0.4953173508 | 2.3201275929  |
| H     | 0.3277758563  | -1.5507559244 | -1.4269801825 |
| H     | 1.6297503534  | -0.1069760994 | -2.7590246572 |
| H     | 0.6346477242  | 0.9085260411  | -1.7237513970 |
| H     | 1.7103553437  | 2.2668712286  | 0.1102565149  |
| H     | 3.7334904639  | 3.5202553963  | 0.7882209127  |
| H     | 5.9376413027  | 2.9626308928  | -0.2182545108 |
| H     | 6.0934904732  | 1.1505407613  | -1.9148417402 |
| H     | 4.0684809040  | -0.0990043957 | -2.5913413784 |
| H     | 4.5115416649  | -2.3662073546 | 1.4701131091  |
| H     | 4.2821552698  | -3.3111209813 | -0.0217518970 |
| H     | 3.4913191798  | -3.8323856514 | 1.4839187017  |
| H     | 1.7470936828  | -3.1528591473 | 2.8616188727  |
| H     | 0.4558873729  | -3.2659801093 | 1.6481630861  |
| H     | 0.3368729160  | -2.1161286635 | 3.0064093931  |
| H     | 3.0126596916  | 0.2303993857  | 1.7094540368  |
| H     | 3.1769788577  | -1.0018510287 | 2.9854594104  |
| H     | 1.7526644536  | 0.0369407962  | 2.9528221518  |
| H     | -2.8430485466 | -0.1671079177 | 1.7024162708  |
| H     | -2.9154532881 | 2.2724428272  | 3.0581631904  |
| H     | -4.3200683501 | 1.9296556061  | 0.8839540832  |
| H     | -2.9988335644 | 3.6300156203  | -0.4249379038 |
| H     | -2.5204764628 | 2.1483128632  | -1.2474865972 |

```

H -0.2940194077  3.1836608155 -0.2453694362
H -0.4878263335  3.1403970109  2.4021303666
H -1.3401012440  0.0580049202 -0.9631407577
H -0.5327090677 -0.3836193888  1.9781123518
C -3.9420764131 -0.3909142257 -0.1147106454
C -4.9958755427 -0.9947983697  0.5879152068
C -4.0100646926 -0.3426629364 -1.5152151345
C -6.0843024809 -1.5446089818 -0.0883886560
H -4.9609993192 -1.0424122972  1.6742293821
C -5.0994173704 -0.8898393383 -2.1920200217
H -3.2109023595  0.1098485272 -2.0960326574
C -6.1401080261 -1.4920398707 -1.4817169844
H -6.8853388613 -2.0154619413  0.4737243036
H -5.1323551477 -0.8493094732 -3.2768083115
H -6.9863235244 -1.9189036854 -2.0114660227

```

**Structure: E\_a2\_exo**

B3LYP/6-31(g), gas phase

E(RB3LYP) = -1232.00220134

1 imaginary frequency.

Zero-point correction= 0.522166 (Hartree/Particle)

Thermal correction to Energy= 0.549739

Thermal correction to Enthalpy= 0.550683

Thermal correction to Gibbs Free Energy= 0.462370

Sum of electronic and ZPE= -1231.480036

Sum of electronic and thermal Energies= -1231.452463

Sum of electronic and thermal Enthalpies= -1231.451519

Sum of electronic and thermal Free Energies= -1231.539831

|       | E        | CV        | S         |
|-------|----------|-----------|-----------|
|       | KCal/Mol | Cal/Mol-K | Cal/Mol-K |
| Total | 344.966  | 108.107   | 185.869   |

```

C  3.4570845527  3.0543271823 -0.1651212399
C  2.4074749017  2.2539618442 -0.6200113465
C  2.6522218460  1.0516382127 -1.2957500889
C  3.9847972365  0.6754529383 -1.5278752143
C  5.0365598826  1.4706807488 -1.0703702982
C  4.7775477261  2.6589947543 -0.3836172572
C  1.4988719491  0.2000639135 -1.7860366861
C  1.1797049182 -1.0763391653 -0.9606353311
N  0.8630775194 -0.9074622447  0.4648904010
C  1.8922663326 -1.5418254500  1.3628996102
N  2.7356256503 -2.2166064525  0.3741037175
C  2.3815748537 -2.0172019166 -0.9278427628
C -0.3287860397 -0.5152389066  0.9249465401
O  2.9333510669 -2.4692039958 -1.9153340706
C  3.9083432482 -3.0022718547  0.7296527041
C  2.6622624526 -0.4631290335  2.1408198171
C  1.2563074749 -2.5703878065  2.3137186207
C -1.4092002865 -0.0553774462  0.1884714719

```

|   |               |               |               |
|---|---------------|---------------|---------------|
| C | -1.0708322831 | 2.7810396974  | 1.0919623865  |
| C | -1.9457566730 | 2.1679237152  | 2.1321551454  |
| C | -3.1631559632 | 1.7506278358  | 1.3127751822  |
| C | -2.7370706750 | 0.0037424437  | 0.7580685025  |
| C | -3.1221140767 | 2.5768650035  | 0.1542348593  |
| C | -1.8309029057 | 3.1155280791  | -0.0118099142 |
| H | -0.0246756417 | 3.0214790110  | 1.2420121248  |
| H | -1.2953340373 | 0.0979215460  | -0.8782728486 |
| H | -2.2686446339 | 2.9651739392  | 2.8225065668  |
| H | -1.4746518685 | 1.3960067070  | 2.7434307058  |
| H | -4.1164178968 | 1.5717700040  | 1.8041855328  |
| H | -1.4887985886 | 3.6774691309  | -0.8733717813 |
| H | -3.9413652647 | 2.6933751907  | -0.5465095566 |
| H | -2.7768673194 | -0.4276069874 | 1.7600638554  |
| H | 0.3412560154  | -1.5917905052 | -1.4466669837 |
| H | 4.3482575094  | -3.3504458326 | -0.2060098864 |
| H | 4.6432087171  | -2.3941857820 | 1.2671337385  |
| H | 3.6400349802  | -3.8702411345 | 1.3402718265  |
| H | 3.4326681689  | -0.9221952685 | 2.7677694011  |
| H | 3.1346273517  | 0.2464333150  | 1.4580568820  |
| H | 1.9816032893  | 0.0813144422  | 2.8043114686  |
| H | 2.0441615371  | -3.1146579907 | 2.8414624237  |
| H | 0.6483265951  | -3.2908580816 | 1.7587961353  |
| H | 0.6409113512  | -2.0925755074 | 3.0817483086  |
| H | 1.3795221512  | 2.5769855636  | -0.4737980397 |
| H | 0.5932318664  | 0.8115368758  | -1.8582578994 |
| H | 1.7087282273  | -0.1761107933 | -2.7940113896 |
| H | 3.2463181500  | 3.9897696286  | 0.3464972606  |
| H | 5.5982535665  | 3.2802420693  | -0.0368997579 |
| H | 6.0615780226  | 1.1678045937  | -1.2648515764 |
| H | 4.1969553244  | -0.2373363435 | -2.0767708612 |
| H | -0.4568690839 | -0.6338612801 | 1.9977279567  |
| C | -3.9049576534 | -0.4577513236 | -0.0645975901 |
| C | -4.9248087959 | -1.1851374252 | 0.5663157929  |
| C | -4.0165096889 | -0.1946781847 | -1.4387302466 |
| C | -6.0237231121 | -1.6499480029 | -0.1574112556 |
| H | -4.8550204896 | -1.3991263289 | 1.6307388856  |
| C | -5.1142207508 | -0.6562415988 | -2.1616913894 |
| H | -3.2462521233 | 0.3730546815  | -1.9551655422 |
| C | -6.1211950474 | -1.3867424044 | -1.5233874394 |
| H | -6.8001007270 | -2.2171229205 | 0.3473006204  |
| H | -5.1839462949 | -0.4483816858 | -3.2254046124 |
| H | -6.9752495145 | -1.7459734137 | -2.0895175775 |

**Structure: E\_c1\_endo**

B3LYP/6-31(g), gas phase  
E(RB3LYP) = -1232.00255200

1 imaginary frequency.

Zero-point correction= 0.522362 (Hartree/Particle)  
Thermal correction to Energy= 0.549861  
Thermal correction to Enthalpy= 0.550805

Thermal correction to Gibbs Free Energy= 0.462558  
 Sum of electronic and ZPE= -1231.480190  
 Sum of electronic and thermal Energies= -1231.452691  
 Sum of electronic and thermal Enthalpies= -1231.451747  
 Sum of electronic and thermal Free Energies= -1231.539994

|       | E             | CV            | S             |
|-------|---------------|---------------|---------------|
|       | KCal/Mol      | Cal/Mol-K     | Cal/Mol-K     |
| Total | 345.043       | 107.860       | 185.730       |
| C     | 1.8656730163  | -1.3060823513 | 2.4693746808  |
| C     | 0.4739709515  | -1.8221124177 | 2.6185201612  |
| C     | 0.4414813550  | -3.1650511175 | 2.2575405230  |
| C     | 1.6545626127  | -3.4832081655 | 1.6390004262  |
| C     | 2.4377415531  | -2.2937054228 | 1.4515295112  |
| C     | 1.9217439440  | -1.6176247071 | -0.1674138679 |
| C     | 0.6564438265  | -0.9122268303 | -0.0131453824 |
| C     | -0.5439059295 | -1.4743475153 | -0.4212450942 |
| N     | -1.7315520843 | -0.8679105026 | -0.4796094371 |
| C     | -2.9905679397 | -1.5623585149 | -0.9019087838 |
| N     | -3.9904394325 | -0.5737162511 | -0.4938873296 |
| C     | -3.4844436470 | 0.5912635551  | 0.0107923912  |
| C     | -1.9607821854 | 0.5104265286  | -0.0364278772 |
| C     | -2.9906582683 | -1.7839895388 | -2.4237382650 |
| C     | -3.1848763410 | -2.8833431009 | -0.1407075920 |
| C     | -1.3473988565 | 1.6096998850  | -0.9643550775 |
| C     | -0.6707490915 | 2.7349338782  | -0.2051534268 |
| C     | 0.6515466252  | 3.0912929032  | -0.5021989640 |
| C     | 1.2804833006  | 4.1336822448  | 0.1839057394  |
| C     | 0.5942467523  | 4.8283034286  | 1.1802230842  |
| C     | -0.7255402060 | 4.4817558176  | 1.4799597910  |
| C     | -1.3572155254 | 3.4457817512  | 0.7914482750  |
| O     | -4.1236271735 | 1.5521026241  | 0.4003082275  |
| C     | -5.4235248705 | -0.7734539146 | -0.6584985104 |
| H     | -0.3948252364 | -3.8395849690 | 2.4016396632  |
| H     | 2.3911271534  | -1.4698029877 | 3.4253352801  |
| H     | 1.9223114312  | -4.4621190577 | 1.2531966378  |
| H     | 3.5155627306  | -2.3930030723 | 1.3544512926  |
| H     | 1.8171407999  | -2.5202837032 | -0.7697978856 |
| H     | -0.3345066021 | -1.2752755887 | 3.0918869600  |
| H     | 1.9583111690  | -0.2467019825 | 2.2317681104  |
| H     | 0.6730880778  | 0.1317559121  | 0.2780641898  |
| H     | -3.1490938011 | -2.7154928218 | 0.9397623865  |
| H     | 1.1889343170  | 2.5631270787  | -1.2870266823 |
| H     | -1.2701790007 | 5.0272785564  | 2.2455943239  |
| H     | 1.0798446544  | 5.6407270470  | 1.7132873169  |
| H     | 2.3016388077  | 4.4073012485  | -0.0680924587 |
| H     | -2.3912500372 | 3.1932538236  | 1.0133239493  |
| H     | -1.5637133528 | 0.6288896642  | 0.9796945630  |
| H     | -2.1480503165 | 2.0130255554  | -1.5958968594 |
| H     | -0.6277321509 | 1.1340357962  | -1.6381544388 |
| H     | -5.9089095076 | 0.1507830727  | -0.3415659267 |
| H     | -5.7876506572 | -1.5975598945 | -0.0364428270 |
| H     | -5.6777488275 | -0.9709383238 | -1.7047930051 |
| H     | -4.1569254053 | -3.3164039342 | -0.3923599298 |
| H     | -2.4271665900 | -3.6226385265 | -0.4176414269 |

```

H -3.9286279659 -2.2461771841 -2.7454490464
H -2.1755505309 -2.4544729705 -2.7151003850
H -2.8694076825 -0.8335704543 -2.9509940616
H -0.5425305988 -2.5091795207 -0.7558615520
C 3.1257000223 -0.8365770670 -0.6327179187
C 4.0373310608 -1.4671198766 -1.4933551125
C 3.3852870129 0.4811754492 -0.2258629772
C 5.1738246467 -0.7981261606 -1.9461653240
H 3.8519818124 -2.4884821672 -1.8189815201
C 4.5236724815 1.1486768384 -0.6768868878
H 2.6986225363 1.0096181525 0.4291166129
C 5.4217053026 0.5127772347 -1.5369027643
H 5.8623403671 -1.3007794868 -2.6189360359
H 4.7077608463 2.1698754943 -0.3559208843
H 6.3066886472 1.0362295598 -1.8859395790

```

**Structure: E\_c1\_exo**

B3LYP/6-31(g), gas phase  
E(RB3LYP) = -1232.00398961

1 imaginary frequency.

Zero-point correction= 0.521957 (Hartree/Particle)  
Thermal correction to Energy= 0.549616  
Thermal correction to Enthalpy= 0.550560  
Thermal correction to Gibbs Free Energy= 0.461882  
Sum of electronic and ZPE= -1231.482032  
Sum of electronic and thermal Energies= -1231.454374  
Sum of electronic and thermal Enthalpies= -1231.453430  
Sum of electronic and thermal Free Energies= -1231.542107

|       | E        | CV        | S         |
|-------|----------|-----------|-----------|
|       | KCal/Mol | Cal/Mol-K | Cal/Mol-K |
| Total | 344.889  | 108.154   | 186.638   |

```

C -2.9918821881 -1.7145624418 -0.8659795771
N -1.7446336527 -0.9836611994 -0.4742335178
C -1.9995440049 0.4016885475 -0.0707402878
C -3.5227497091 0.4422075693 0.0181066974
N -4.0091066621 -0.7489237246 -0.4429681424
C -0.5412669807 -1.5587761920 -0.4035977496
C -1.4435762607 1.4853009832 -1.0518854945
C -0.7723659997 2.6505157515 -0.3504150786
C -1.4454529855 3.3743102495 0.6458025228
C -0.8202143058 4.4471659003 1.2818710116
C 0.4798990329 4.8176707981 0.9294026128
C 1.1527616987 4.1097756059 -0.0668516709
C 0.5302718371 3.0307633592 -0.7003029688
O -4.1776125978 1.3946176093 0.4028583386
C -5.4397172502 -0.9909739854 -0.5665451209
C -3.0177108790 -1.9459134332 -2.3865012484
C -3.1369525167 -3.0352274655 -0.0942338764
C 0.6477860509 -0.9425726489 -0.0461364024

```

|   |               |               |               |
|---|---------------|---------------|---------------|
| C | 1.9056747581  | -1.6460033590 | -0.1117311230 |
| C | 2.3845325473  | -2.2272918543 | 1.6388590344  |
| C | 1.0954365329  | -2.8408762496 | 2.1741608697  |
| C | 0.4252015487  | -1.6550971454 | 2.7872118268  |
| C | 1.3610270374  | -0.6666076859 | 3.0194870367  |
| C | 2.5719837956  | -1.0443206903 | 2.4056331789  |
| H | 1.3727200866  | -3.5367084740 | 2.9837547614  |
| H | 0.4901299976  | -3.4069234337 | 1.4640368673  |
| H | 1.8005730178  | -2.6506526189 | -0.5270237903 |
| H | 3.2391836912  | -2.8578435353 | 1.4070772092  |
| H | 3.4886700078  | -0.4657317975 | 2.4291397498  |
| H | 1.1882387431  | 0.2603641258  | 3.5540064383  |
| H | 0.6466454646  | 0.1179147639  | 0.1779050026  |
| H | -0.6105886717 | -1.6353599413 | 3.1083464016  |
| H | -1.5748559129 | 0.5626571008  | 0.9281497067  |
| H | -2.2728548584 | 1.8488868535  | -1.6704477691 |
| H | -1.3551457743 | 5.0026785972  | 2.0472084308  |
| H | -2.4650252844 | 3.1022756924  | 0.9080933667  |
| H | 1.0554056685  | 2.4930077944  | -1.4872148018 |
| H | 2.1577236361  | 4.4018088819  | -0.3598910825 |
| H | 0.9601787738  | 5.6589788533  | 1.4208910759  |
| H | -5.9426674007 | -0.0763646591 | -0.2490344327 |
| H | -5.7162863777 | -1.2102578311 | -1.6028696893 |
| H | -5.7633189216 | -1.8162080976 | 0.0759692120  |
| H | -2.1934693270 | -2.5997289886 | -2.6899578545 |
| H | -2.9283153289 | -0.9965249992 | -2.9219802146 |
| H | -3.9515042987 | -2.4305108589 | -2.6868590384 |
| H | -4.1040349128 | -3.4926182701 | -0.3208366348 |
| H | -2.3702073398 | -3.7594013206 | -0.3858279875 |
| H | -3.0801736709 | -2.8617160396 | 0.9844674322  |
| H | -0.7333316764 | 1.0058467111  | -1.7329920292 |
| H | -0.5179935001 | -2.6080587121 | -0.6887668791 |
| C | 3.1278259663  | -0.9697488389 | -0.6550499520 |
| C | 4.0487018649  | -1.7375823298 | -1.3834347871 |
| C | 3.3885538691  | 0.3971242504  | -0.4670438494 |
| C | 5.1984274150  | -1.1570285158 | -1.9200987382 |
| H | 3.8611448105  | -2.7978460808 | -1.5400289948 |
| C | 4.5379058511  | 0.9760307487  | -1.0015274623 |
| H | 2.6951577644  | 1.0222191008  | 0.0893818020  |
| C | 5.4467462901  | 0.2018969244  | -1.7293421011 |
| H | 5.8962697018  | -1.7668158144 | -2.4861201107 |
| H | 4.7250175029  | 2.0354226830  | -0.8515237541 |
| H | 6.3411542863  | 0.6573947774  | -2.1436073742 |

**Structure: E\_c2\_endo**

B3LYP/6-31(g), gas phase  
E(RB3LYP) = -1232.00111226

1 imaginary frequency.

Zero-point correction= 0.522360 (Hartree/Particle)  
Thermal correction to Energy= 0.549879  
Thermal correction to Enthalpy= 0.550823

Thermal correction to Gibbs Free Energy= 0.462536  
 Sum of electronic and ZPE= -1231.478752  
 Sum of electronic and thermal Energies= -1231.451233  
 Sum of electronic and thermal Enthalpies= -1231.450289  
 Sum of electronic and thermal Free Energies= -1231.538577

|       | E             | CV            | S             |
|-------|---------------|---------------|---------------|
|       | KCal/Mol      | Cal/Mol-K     | Cal/Mol-K     |
| Total | 345.054       | 107.872       | 185.817       |
| C     | -0.1629446729 | 2.7276837100  | 1.7053344547  |
| C     | 0.9508576796  | 2.5082433124  | 0.8840185957  |
| C     | 1.3148774607  | 3.4993638107  | -0.0400117117 |
| C     | 0.5707080132  | 4.6747616830  | -0.1425230163 |
| C     | -0.5417630794 | 4.8819318861  | 0.6768506971  |
| C     | -0.9056419661 | 3.9073320826  | 1.6062472041  |
| C     | 1.7571268929  | 1.2291141210  | 1.0035850973  |
| C     | 1.9297579962  | 0.4722569718  | -0.3529774210 |
| N     | 1.7168517935  | -0.9785204540 | -0.2856771392 |
| C     | 2.9655588471  | -1.7636201539 | -0.5564002569 |
| N     | 3.8787538315  | -0.6888418198 | -0.9494087895 |
| C     | 3.3606717233  | 0.5729278886  | -0.8722669954 |
| C     | 0.5126850903  | -1.5417881050 | -0.1567972839 |
| C     | 3.4367499755  | -2.4718848072 | 0.7249023186  |
| C     | 2.7641057392  | -2.7601582182 | -1.7091632301 |
| C     | 5.2551031665  | -0.9223211977 | -1.3639508677 |
| O     | 3.9374509271  | 1.6142343322  | -1.1303366117 |
| C     | -0.6937972416 | -0.8799550043 | 0.0138355260  |
| C     | -1.9769545068 | -1.5458986823 | -0.1903858008 |
| C     | -2.7133992643 | -1.9678072768 | 1.4060532922  |
| C     | -2.2050972060 | -0.8848001528 | 2.3594090810  |
| C     | -0.8764230751 | -1.4440031067 | 2.7430113157  |
| C     | -0.8896596693 | -2.8240786942 | 2.5646469643  |
| C     | -2.0369850594 | -3.1610160565 | 1.8423059384  |
| H     | -0.1226558146 | -3.5134377987 | 2.8991218570  |
| H     | -2.3194241712 | -4.1679012716 | 1.5501003103  |
| H     | -0.0948338494 | -0.8820285029 | 3.2426202600  |
| H     | -2.8492483295 | -0.8972693745 | 3.2548269783  |
| H     | -2.2003747009 | 0.1373800667  | 1.9814516276  |
| H     | -3.7779164263 | -2.0292833246 | 1.1948540678  |
| H     | -1.8629537172 | -2.5247443245 | -0.6563454644 |
| H     | -0.6840633206 | 0.1993674061  | 0.1147476538  |
| H     | -0.4357962657 | 1.9838952214  | 2.4525014878  |
| H     | -1.7588782766 | 4.0668401282  | 2.2599969086  |
| H     | -1.1146570252 | 5.8012955438  | 0.5975485958  |
| H     | 0.8666229893  | 5.4355491993  | -0.8592563371 |
| H     | 2.1908952280  | 3.3502583265  | -0.6667121118 |
| H     | 2.7529056497  | 1.4526273275  | 1.4042927271  |
| H     | 1.2762250603  | 0.5560188079  | 1.7204935588  |
| H     | 1.2469079048  | 0.8967408263  | -1.0983178665 |
| H     | 3.7165354212  | -3.2380635859 | -1.9548321936 |
| H     | 2.0700926133  | -3.5603179608 | -1.4351960998 |
| H     | 2.3893528477  | -2.2493493882 | -2.6006670995 |
| H     | 3.5944417237  | -1.7484888549 | 1.5301348758  |
| H     | 4.3747622888  | -3.0062787051 | 0.5475590774  |
| H     | 2.6950816792  | -3.2091518664 | 1.0504017302  |



```

H  5.8202642505 -1.4451440868 -0.5855550285
H  5.3009163001 -1.4990924838 -2.2933027821
H  5.7035112323  0.0578171341 -1.5329122118
H  0.5032685903 -2.6261421019 -0.2347331211
C -3.0541541598 -0.7690114135 -0.9106433273
C -3.9149720726 -1.4669151729 -1.7714403082
C -3.2436826464  0.6112300883 -0.7420485728
C -4.9339862019 -0.8049438625 -2.4550112501
H -3.7813843082 -2.5370905252 -1.9149774855
C -4.2646327118  1.2721861261 -1.4243747343
H -2.5919543057  1.1920744765 -0.0949657019
C -5.1129709309  0.5681150031 -2.2815445798
H -5.5838290831 -1.3614480007 -3.1238818288
H -4.3924758203  2.3422101746 -1.2895561569
H -5.9052440369  1.0871976804 -2.8125138154

```

**Structure: E\_c2\_exo**

B3LYP/6-31(g), gas phase  
E(RB3LYP) = -1232.00184563

1 imaginary frequency.

Zero-point correction= 0.522025 (Hartree/Particle)  
Thermal correction to Energy= 0.549684  
Thermal correction to Enthalpy= 0.550628  
Thermal correction to Gibbs Free Energy= 0.461928  
Sum of electronic and ZPE= -1231.479821  
Sum of electronic and thermal Energies= -1231.452162  
Sum of electronic and thermal Enthalpies= -1231.451218  
Sum of electronic and thermal Free Energies= -1231.539918

|       | E        | CV        | S         |
|-------|----------|-----------|-----------|
|       | KCal/Mol | Cal/Mol-K | Cal/Mol-K |
| Total | 344.932  | 108.118   | 186.685   |

```

C  1.5891254193  3.4268240810 -0.2072759101
C  1.0900460286  2.5028914017  0.7234585618
C -0.0656877223  2.8301530831  1.4441935040
C -0.7158579709  4.0503257552  1.2425772784
C -0.2162446118  4.9587153003  0.3094747610
C  0.9375027487  4.6430174494 -0.4122478843
C  1.7902450478  1.1765485799  0.9543412234
C  1.9781639191  0.3413853568 -0.3528513917
N  1.7050074030 -1.0956637314 -0.2235572756
C  2.9222629189 -1.9440114003 -0.4393312255
N  3.8927594918 -0.9255595362 -0.8421416762
C  3.4285212764  0.3591734438 -0.8294297152
C  0.4756602115 -1.6089121484 -0.1078829652
O  4.0615649900  1.3616007953 -1.1094524017
C  5.2697587562 -1.2335372509 -1.2016610130
C  2.7043168789 -2.9689705988 -1.5644627089
C  3.3302586376 -2.6297363854  0.8755824442
C -0.7096590146 -0.9047480785  0.0234907321

```

C -1.9945180795 -1.5484772557 -0.1548102805  
 C -0.9661062480 -1.5167872527 2.9308831992  
 C -1.8539241330 -0.4592011449 2.9892931694  
 C -2.9733939555 -0.7693206398 2.1950570488  
 C -2.7529044836 -1.9895200287 1.4907617963  
 C -1.6169532134 -2.6728534638 2.2483343638  
 H -1.8947194520 -2.5793843902 -0.5012724827  
 H -3.6128321816 -2.5701670801 1.1649944374  
 H -2.0737316383 -3.3131410916 3.0215393543  
 H -0.6745743758 0.1756905430 0.1090327761  
 H 0.0052466907 -1.5564968053 3.4117150763  
 H -1.7057515860 0.4649831482 3.5354044379  
 H -3.8377127438 -0.1290487842 2.0580707437  
 H -0.9509421148 -3.3107977190 1.6648142755  
 H 3.5014444401 -1.8866295357 1.6598598077  
 H 2.3706158482 -2.4728487254 -2.4802552188  
 H 1.9719417681 -3.7309502525 -1.28144446056  
 H 3.6407962942 -3.4937596216 -1.7727749340  
 H 4.2466170517 -3.2117365001 0.7397424010  
 H 2.5484194678 -3.3216984501 1.2065960737  
 H 5.3192571659 -1.8529186311 -2.1029467722  
 H 5.7884807136 -1.7436297237 -0.3834818482  
 H 5.7642472064 -0.2812604667 -1.3988216817  
 H 1.3364277143 0.7525993235 -1.1413242502  
 H 2.7762134827 1.3465641414 1.4027920958  
 H -0.4484490291 2.1332313746 2.1871448425  
 H 1.2187130023 0.5793449496 1.6720720828  
 H 2.4943879492 3.1913088209 -0.7610745018  
 H 1.3378024513 5.3502924126 -1.1331329265  
 H -0.7169861592 5.9094496185 0.1507916672  
 H -1.6045561574 4.2929311475 1.8192082399  
 H 0.4306225208 -2.6933762474 -0.1723449410  
 C -3.0667443290 -0.8328972640 -0.9262361014  
 C -3.9177254140 -1.5872168483 -1.7474011498  
 C -3.2519677000 0.5569190542 -0.8574225980  
 C -4.9257306243 -0.9712114906 -2.4899483035  
 H -3.7859252895 -2.6652651637 -1.8142609655  
 C -4.2598546668 1.1716141627 -1.5976820653  
 H -2.6085126899 1.1726884946 -0.2339369458  
 C -5.0999220103 0.4104680245 -2.4159828604  
 H -5.5705712147 -1.5712279779 -3.1250901366  
 H -4.3868193688 2.2487006934 -1.5401568936  
 H -5.8831863176 0.8938955294 -2.9920597633

Structure: Z\_a1\_endo

B3LYP/6-31(g), gas phase  
 E(RB3LYP) = -1231.99945351

1 imaginary frequency.

Zero-point correction= 0.522562 (Hartree/Particle)  
 Thermal correction to Energy= 0.549978  
 Thermal correction to Enthalpy= 0.550922  
 Thermal correction to Gibbs Free Energy= 0.463407  
 Sum of electronic and ZPE= -1231.476891

Sum of electronic and thermal Energies= -1231.449476  
 Sum of electronic and thermal Enthalpies= -1231.448532  
 Sum of electronic and thermal Free Energies= -1231.536046

|       | E             | CV            | S             |
|-------|---------------|---------------|---------------|
|       | KCal/Mol      | Cal/Mol-K     | Cal/Mol-K     |
| Total | 345.116       | 107.876       | 184.190       |
| C     | -2.0066078276 | -3.1109382640 | -1.7922888742 |
| C     | -2.0794780525 | -3.2227105504 | -0.4073100718 |
| C     | -3.3158743906 | -2.5394659317 | 0.0739118736  |
| C     | -3.5629047928 | -1.5495549157 | -1.0646768004 |
| C     | -2.9563311723 | -2.1731991790 | -2.2076700201 |
| C     | -2.4785357322 | -0.1297828464 | -0.6565363286 |
| C     | -1.3073340795 | -0.6049809604 | 0.0677525788  |
| C     | -0.0887029089 | -0.7837083981 | -0.5753561418 |
| N     | 1.1385311778  | -0.9797573771 | -0.0906431890 |
| C     | 2.2854894729  | -1.1627949445 | -1.0037454332 |
| C     | 3.4486782152  | -1.3933955446 | -0.0481594233 |
| N     | 2.9766755122  | -1.3138771486 | 1.2287826556  |
| C     | 1.5402904588  | -1.0419467144 | 1.3549443048  |
| C     | 2.5677678854  | 0.0076483262  | -1.9806542885 |
| C     | 2.7361268668  | 1.3661807919  | -1.3338145149 |
| C     | 1.6824121639  | 2.2901765281  | -1.3300978778 |
| C     | 1.8245993628  | 3.5386948044  | -0.7217947323 |
| C     | 3.0303416042  | 3.8821931908  | -0.1087337814 |
| C     | 4.0922596081  | 2.9746102196  | -0.1160507184 |
| C     | 3.9488513708  | 1.7276703394  | -0.7259328175 |
| C     | 1.2937706323  | 0.3045546983  | 2.0544278982  |
| C     | 0.8526535723  | -2.2156156261 | 2.0751239693  |
| C     | 3.8669023471  | -1.4466738934 | 2.3733391191  |
| O     | 4.5986033005  | -1.5971678044 | -0.3940361915 |
| H     | 2.1410603420  | -2.0775018897 | -1.5935139974 |
| H     | 3.8904057009  | -0.5282525129 | 2.9684141267  |
| H     | 3.5747495591  | -2.2855372799 | 3.0130061741  |
| H     | 4.8638272032  | -1.6371377543 | 1.9731033903  |
| H     | 1.0464896918  | -3.1534672935 | 1.5455521545  |
| H     | 1.2497343136  | -2.3064767373 | 3.0899108614  |
| H     | -0.2259386346 | -2.0710656556 | 2.1639963928  |
| H     | 1.8357657508  | 1.1026094907  | 1.5417343163  |
| H     | 0.2313564940  | 0.5592272096  | 2.0714700040  |
| H     | 1.6364239634  | 0.2507803765  | 3.0918846077  |
| H     | 3.4812061836  | -0.2862419621 | -2.5102167645 |
| H     | 1.7699487636  | 0.0432871491  | -2.7323046672 |
| H     | 0.7454850621  | 2.0404384596  | -1.8243233143 |
| H     | 5.0402648312  | 3.2424345546  | 0.3420091620  |
| H     | 3.1472867768  | 4.8557933262  | 0.3584874434  |
| H     | 0.9991979920  | 4.2450701897  | -0.7366862315 |
| H     | 4.7836154839  | 1.0324583951  | -0.7392083520 |
| H     | -2.2281477282 | 0.2468106979  | -1.6478439312 |
| H     | -4.5453171508 | -1.0985732304 | -1.1768621862 |
| H     | -3.1302596036 | -1.8725841335 | -3.2363327739 |
| H     | -1.3057944241 | -3.6330480739 | -2.4339473297 |
| H     | -1.3600051241 | -0.6461522153 | 1.1465760975  |
| H     | -1.4453123535 | -3.8498930402 | 0.2095757775  |
| H     | -4.1371561345 | -3.2754964376 | 0.0602829431  |

```

H -3.2739310501 -2.1255519409 1.0810483459
H -0.1055926737 -0.7374069072 -1.6627866033
C -3.3911970844 0.8481341921 0.0407006182
C -3.9816181817 1.8688963066 -0.7197699682
C -3.6906874373 0.7727376141 1.4095920907
C -4.8387346927 2.7967473216 -0.1291877622
H -3.7623333784 1.9432490659 -1.7826994901
C -4.5497044955 1.6985771067 2.0003563411
H -3.2524884369 -0.0022640809 2.0329579702
C -5.1265129504 2.7134087708 1.2337000734
H -5.2786403627 3.5842378262 -0.7338797956
H -4.7664467261 1.6283147765 3.0622633581
H -5.7943300832 3.4336805160 1.6964967237

```

**Structure: Z\_a1\_exo**

B3LYP/6-31(g), gas phase  
E(RB3LYP) = -1232.00048365

1 imaginary frequency.

Zero-point correction= 0.522084 (Hartree/Particle)  
Thermal correction to Energy= 0.549676  
Thermal correction to Enthalpy= 0.550620  
Thermal correction to Gibbs Free Energy= 0.462199  
Sum of electronic and ZPE= -1231.478400  
Sum of electronic and thermal Energies= -1231.450807  
Sum of electronic and thermal Enthalpies= -1231.449863  
Sum of electronic and thermal Free Energies= -1231.538285

|       | E        | CV        | S         |
|-------|----------|-----------|-----------|
|       | KCal/Mol | Cal/Mol-K | Cal/Mol-K |
| Total | 344.927  | 108.150   | 186.099   |

```

C -3.1077217422 -3.1380700467 0.2706656293
C -2.1733371206 -3.2797029398 -0.7379471336
C -2.5911365841 -2.4668707131 -1.9176889099
C -3.5581984476 -1.4731416911 -1.2817015184
C -4.0016872909 -2.1111201414 -0.0885749279
C -1.2703888361 -0.5805934086 -0.0537429639
C -2.4283182630 -0.0585730683 -0.7429641881
C -0.0565681339 -0.7173346316 -0.7127661038
N 1.1677948716 -0.9843554233 -0.2514824835
C 2.3145051718 -1.0745575818 -1.1785165581
C 3.4741429213 -1.4224535135 -0.2536988056
N 2.9976806683 -1.4941392170 1.0218794125
C 1.5640493085 -1.2236362307 1.1766621958
C 2.6101334521 0.1945624027 -2.0173546751
C 2.7893643037 1.4711004286 -1.2231991614
C 4.0123745560 1.7638552430 -0.5994640560
C 4.1674032788 2.9357067669 0.1423658964
C 3.1068364255 3.8359799995 0.2685921087
C 1.8901181732 3.5611755826 -0.3573996527
C 1.7362081415 2.3874569600 -1.0974489307

```

|   |               |               |               |
|---|---------------|---------------|---------------|
| C | 1.3345200036  | 0.0320101000  | 2.0340747093  |
| C | 0.8585056132  | -2.4660318193 | 1.7475845877  |
| C | 3.8832970044  | -1.7615666716 | 2.1462011120  |
| O | 4.6243336308  | -1.5897575458 | -0.6177917663 |
| H | -1.7776675066 | -2.0493741726 | -2.5132164895 |
| H | -3.1782659736 | -3.1148797279 | -2.5899154905 |
| H | -4.2750815807 | -0.9355201648 | -1.8974367061 |
| H | -1.3363252220 | -3.9691825141 | -0.7349580107 |
| H | -4.8478006450 | -1.7843211085 | 0.5055557722  |
| H | -3.1349333230 | -3.7020364702 | 1.1960520573  |
| H | -2.1931980213 | 0.2729971991  | -1.7564099929 |
| H | -1.3265649714 | -0.7159465638 | 1.0174869488  |
| H | 3.5817933603  | -2.6640097197 | 2.6874827111  |
| H | 3.9118129720  | -0.9155868184 | 2.8402101264  |
| H | 4.8799871577  | -1.9141372212 | 1.7295049320  |
| H | 0.2763405852  | 0.2993113876  | 2.0820236586  |
| H | 1.6737752944  | -0.1518602283 | 3.0577432518  |
| H | 1.0599001830  | -3.3389399249 | 1.1191635389  |
| H | -0.2215114952 | -2.3269515459 | 1.8254799118  |
| H | 1.2343668310  | -2.6721997117 | 2.7536623452  |
| H | 2.1630082107  | -1.9158519692 | -1.8676874717 |
| H | 1.8149576995  | 0.3221433096  | -2.7620135185 |
| H | 3.5219178001  | -0.0468135117 | -2.5754132097 |
| H | 1.8901771913  | 0.8780733034  | 1.6230222683  |
| H | 4.8458948272  | 1.0747758642  | -0.7034931299 |
| H | 5.1234160477  | 3.1519984682  | 0.6109344173  |
| H | 3.2330065331  | 4.7519177051  | 0.8387077908  |
| H | 1.0650852621  | 4.2638864933  | -0.2796639570 |
| H | 0.7896189273  | 2.1926829920  | -1.5980637717 |
| H | -0.0656388081 | -0.5503839738 | -1.7885846623 |
| C | -3.3185766091 | 0.9334087350  | -0.0534653790 |
| C | -3.8723770520 | 1.9766330757  | -0.8098763596 |
| C | -3.6200408855 | 0.8615009099  | 1.3154538821  |
| C | -4.6987714168 | 2.9308368980  | -0.2148461363 |
| H | -3.6497203485 | 2.0486332762  | -1.8723938696 |
| C | -4.4462137897 | 1.8126782488  | 1.9103219690  |
| H | -3.2130737749 | 0.0603535801  | 1.9275938119  |
| C | -4.9879893619 | 2.8512312839  | 1.1470174467  |
| H | -5.1140815262 | 3.7338949076  | -0.8163518045 |
| H | -4.6670500340 | 1.7454031898  | 2.9716236945  |
| H | -5.6318296433 | 3.5908946794  | 1.6132146079  |

**Structure: Z\_a2\_endo**

B3LYP/6-31(g), gas phase  
E(RB3LYP) = -1231.99825704

1 imaginary frequency.

Zero-point correction= 0.522489 (Hartree/Particle)  
Thermal correction to Energy= 0.549991  
Thermal correction to Enthalpy= 0.550935  
Thermal correction to Gibbs Free Energy= 0.463215  
Sum of electronic and ZPE= -1231.475768

Sum of electronic and thermal Energies= -1231.448266  
 Sum of electronic and thermal Enthalpies= -1231.447322  
 Sum of electronic and thermal Free Energies= -1231.535042

|       | E             | CV            | S             |
|-------|---------------|---------------|---------------|
|       | KCal/Mol      | Cal/Mol-K     | Cal/Mol-K     |
| Total | 345.125       | 107.989       | 184.623       |
| C     | -2.2342473472 | 2.4302296631  | 1.1356805672  |
| C     | -0.8518480952 | 2.7051680361  | 0.6432476891  |
| C     | -0.9177995772 | 3.1749406613  | -0.6597858989 |
| C     | -2.2252006640 | 2.9899051851  | -1.1337913054 |
| C     | -2.9914532390 | 2.2562847521  | -0.1780617057 |
| C     | -1.4315360625 | 0.0211371521  | -0.0680495016 |
| C     | -2.6892989383 | 0.4637289381  | -0.6400408309 |
| C     | -0.2977961185 | -0.1516357996 | -0.8514949291 |
| N     | 0.8217265206  | -0.8391839218 | -0.6062403739 |
| C     | 1.8970387417  | -0.9081351842 | -1.6167971373 |
| C     | 2.8096850555  | -1.9993524606 | -1.0737681137 |
| N     | 2.3190323461  | -2.4067639901 | 0.1305391278  |
| C     | 1.0655421416  | -1.7690109842 | 0.5508019568  |
| C     | 2.6764634549  | 0.4044234993  | -1.8825202074 |
| C     | 3.3445641833  | 1.0412557220  | -0.6800684968 |
| C     | 4.5187839510  | 0.5042502371  | -0.1284335557 |
| C     | 5.1198079647  | 1.1013778175  | 0.9808906244  |
| C     | 4.5686026754  | 2.2506894009  | 1.5515992845  |
| C     | 3.4147991611  | 2.8075780313  | 0.9982328194  |
| C     | 2.8123523376  | 2.2036699607  | -0.1073758782 |
| C     | 1.2603991496  | -0.9858146279 | 1.8589449944  |
| C     | -0.0419732932 | -2.8330517956 | 0.6581755844  |
| C     | 3.0070313245  | -3.4151558858 | 0.9245454699  |
| O     | 3.8188972258  | -2.3975402678 | -1.6283715272 |
| H     | 0.0398731292  | 2.6755488911  | 1.2595704339  |
| H     | -0.0941625354 | 3.5876136499  | -1.2306432638 |
| H     | -2.5765320016 | 3.2672030495  | -2.1229063364 |
| H     | -4.0746989496 | 2.3304716475  | -0.1935359858 |
| H     | -2.6125181949 | 3.3487978849  | 1.6152700398  |
| H     | -2.3291449310 | 1.6294205876  | 1.8689162016  |
| H     | -1.4420374959 | -0.3582495700 | 0.9441278559  |
| H     | -2.6580321381 | 0.5243419500  | -1.7268821197 |
| H     | 0.2230848387  | -3.5533883036 | 1.4369666368  |
| H     | -0.1454825356 | -3.3698027740 | -0.2892165764 |
| H     | -1.0099015760 | -2.4068741643 | 0.9260167556  |
| H     | 0.3499509013  | -0.4506848514 | 2.1415662534  |
| H     | 1.4977326437  | -1.6755527286 | 2.6742511425  |
| H     | 2.0761825958  | -0.2662175544 | 1.7555171123  |
| H     | 2.3861427415  | -4.3044094819 | 1.0715723261  |
| H     | 3.3056000314  | -3.0162166491 | 1.8991490191  |
| H     | 3.9003254037  | -3.6964871170 | 0.3649612750  |
| H     | 1.4755508049  | -1.2519220565 | -2.5700040673 |
| H     | 2.9971740106  | 3.7208244360  | 1.4144852511  |
| H     | 1.9308272981  | 2.6564480981  | -0.5542753453 |
| H     | 1.9978878184  | 1.1232163023  | -2.3579779608 |
| H     | 3.4243349891  | 0.1345125808  | -2.6373963112 |
| H     | 5.0459238362  | 2.7194168866  | 2.4072541871  |
| H     | 6.0319400777  | 0.6757544326  | 1.3896281099  |

```

H  4.9700003813 -0.3761206225 -0.5764953303
H -0.3075604240  0.3020010566 -1.8424695063
C -3.9547977131 -0.2197166080 -0.1967222385
C -4.9594689297 -0.4507807052 -1.1489709888
C -4.1794201971 -0.6235673136  1.1289325173
C -6.1513501380 -1.0801181532 -0.7915787191
H -4.8037074672 -0.1440419076 -2.1808563743
C -5.3724208179 -1.2488934548  1.4872522614
H -3.4255405961 -0.4593873475  1.8944143176
C -6.3621068231 -1.4798029257  0.5286807186
H -6.9126359688 -1.2586516923 -1.5451214531
H -5.5285648666 -1.5586525687  2.5164216944
H -7.2899641001 -1.9684640428  0.8101248116

```

**Structure: Z\_a2\_exo**

B3LYP/6-31(g), gas phase  
E(RB3LYP) = -1232.00099134

1 imaginary frequency.

Zero-point correction= 0.522056 (Hartree/Particle)  
Thermal correction to Energy= 0.549672  
Thermal correction to Enthalpy= 0.550616  
Thermal correction to Gibbs Free Energy= 0.462536  
Sum of electronic and ZPE= -1231.478935  
Sum of electronic and thermal Energies= -1231.451320  
Sum of electronic and thermal Enthalpies= -1231.450375  
Sum of electronic and thermal Free Energies= -1231.538456

|       | E        | CV        | S         |
|-------|----------|-----------|-----------|
|       | KCal/Mol | Cal/Mol-K | Cal/Mol-K |
| Total | 344.924  | 108.228   | 185.380   |

```

C -1.6098959615  2.3253129434  1.8926134534
C -0.6320957190  2.5211409750  0.9385526227
C -1.2762835348  2.8015954353 -0.3785019642
C -2.6864522572  2.2692066946 -0.1608624359
C -2.8626733462  2.2560599781  1.2462268475
C -1.3519335215 -0.1552632266 -0.0721033478
C -2.5220058834  0.4179999810 -0.6864848166
C -0.1876739765 -0.3473823249 -0.8019304084
N  0.9200583255 -1.0354513051 -0.5049582050
C  1.9957817445 -1.2064786897 -1.5042691008
C  2.9875236571 -2.1136591103 -0.7853657252
N  2.4685013498 -2.4375517263  0.4317515847
C  1.1561669663 -1.8544407109  0.7320505562
C  2.6627159843  0.0807237656 -2.0435811060
C  3.1639442022  1.0728234202 -1.0126967379
C  4.2426076973  0.7697438390 -0.1660851496
C  4.6974266292  1.7020049895  0.7679789144
C  4.0972323973  2.9597947181  0.8622090636
C  3.0434198576  3.2839000008  0.0066948974
C  2.5817207945  2.3438290840 -0.9189133303

```

|   |               |               |               |
|---|---------------|---------------|---------------|
| C | 1.2396856997  | -0.9580461283 | 1.9780870630  |
| C | 0.1078451814  | -2.9732982546 | 0.8708428088  |
| C | 3.1891975070  | -3.3000118361 | 1.3575074207  |
| O | 4.0605992736  | -2.4662676405 | -1.2424005808 |
| H | 0.4372343891  | 2.5724667103  | 1.1115670168  |
| H | -2.3771056247 | 0.6404468940  | -1.7451638493 |
| H | -3.5037022115 | 2.5744805230  | -0.8088436690 |
| H | -3.8149843805 | 2.1171116554  | 1.7460949850  |
| H | -1.4457417379 | 2.2138998453  | 2.9583914622  |
| H | -0.7373792709 | 2.4250170485  | -1.2493672978 |
| H | -1.4447067094 | -0.5731981697 | 0.9201381614  |
| H | -1.3516399938 | 3.8954815856  | -0.4988947576 |
| H | 3.4930474619  | -0.2845738337 | -2.6605200480 |
| H | 1.9687306382  | 0.5813528965  | -2.7289584786 |
| H | 1.7821661490  | 2.6158031726  | -1.6058819984 |
| H | 2.5965189227  | 4.2742296805  | 0.0429426618  |
| H | 4.4649112996  | 3.6889734727  | 1.5783390127  |
| H | 4.7479951575  | -0.1867826746 | -0.2594167324 |
| H | 5.5390329882  | 1.4525838858  | 1.4080964396  |
| H | 1.6048853859  | -1.7644982823 | -2.3660675003 |
| H | 3.4306530078  | -2.7737150133 | 2.2865612415  |
| H | 2.6163648059  | -4.2027676847 | 1.5918494868  |
| H | 4.1164794073  | -3.5873888176 | 0.8596897014  |
| H | 0.3660984313  | -3.6140672331 | 1.7186105759  |
| H | -0.8958230231 | -2.5839210436 | 1.0498473582  |
| H | 0.0875377077  | -3.5879324194 | -0.0336941436 |
| H | 0.2982715763  | -0.4358216388 | 2.1625913385  |
| H | 2.0357831243  | -0.2183971311 | 1.8556000673  |
| H | 1.4558753227  | -1.5662704179 | 2.8611635930  |
| H | -0.1553789039 | 0.0855418424  | -1.8005794696 |
| C | -3.8731081151 | -0.1787546503 | -0.4426506596 |
| C | -4.7999146207 | -0.1888745875 | -1.4960766893 |
| C | -4.2500794467 | -0.7356988243 | 0.7900028408  |
| C | -6.0665951338 | -0.7495280925 | -1.3291807704 |
| H | -4.5249762080 | 0.2368457012  | -2.4587532098 |
| C | -5.5152193731 | -1.2936017864 | 0.9581652319  |
| H | -3.5587674277 | -0.7362438617 | 1.6290612882  |
| C | -6.4279140351 | -1.3030581301 | -0.1012313942 |
| H | -6.7674733694 | -0.7534833600 | -2.1585706112 |
| H | -5.7904954325 | -1.7238767594 | 1.9166722450  |
| H | -7.4133158249 | -1.7388433730 | 0.0330632470  |

**Structure: Z\_b2\_endo**

B3LYP/6-31(g), gas phase  
E(RB3LYP) = -1231.99876913

1 imaginary frequency.

Zero-point correction= 0.522190 (Hartree/Particle)  
Thermal correction to Energy= 0.549862  
Thermal correction to Enthalpy= 0.550807  
Thermal correction to Gibbs Free Energy= 0.462264  
Sum of electronic and ZPE= -1231.476579



Sum of electronic and thermal Energies= -1231.448907  
 Sum of electronic and thermal Enthalpies= -1231.447963  
 Sum of electronic and thermal Free Energies= -1231.536505

|       | E             | CV            | S             |
|-------|---------------|---------------|---------------|
|       | KCal/Mol      | Cal/Mol-K     | Cal/Mol-K     |
| Total | 345.044       | 108.202       | 186.353       |
| C     | 2.3267397607  | 2.4099862353  | -1.6706637663 |
| C     | 2.7328667817  | 1.9885152584  | -0.3949716784 |
| C     | 2.6873444612  | 2.9176412348  | 0.6544853620  |
| C     | 2.2453209706  | 4.2257897401  | 0.4418575821  |
| C     | 1.8270726521  | 4.6254114250  | -0.8285363243 |
| C     | 1.8718414116  | 3.7127179675  | -1.8845301271 |
| C     | 3.2998224204  | 0.6024254080  | -0.1453061211 |
| C     | 2.5719040835  | -0.5956914257 | -0.7879793275 |
| N     | 1.3062405879  | -1.0291081529 | -0.1564243124 |
| C     | 1.3424016091  | -2.4740562063 | 0.2538260712  |
| N     | 2.7275674332  | -2.8242431098 | -0.0749073138 |
| C     | 3.4498473345  | -1.8400519080 | -0.6835354542 |
| C     | 0.2255100739  | -0.2370599717 | -0.1664704211 |
| C     | 1.0962854359  | -2.6255649925 | 1.7639734266  |
| C     | 0.3721881991  | -3.3207001391 | -0.5909668634 |
| C     | 3.2956592371  | -4.1438503336 | 0.1637190126  |
| O     | 4.6034778148  | -1.9059745775 | -1.0644282533 |
| C     | -1.0700633304 | -0.4758167209 | 0.2694782128  |
| C     | -2.1567248619 | 0.4085845608  | -0.1195083936 |
| C     | -2.6295958652 | 1.4899486166  | 1.3116285001  |
| C     | -1.6242220368 | 2.5073219464  | 1.3464066846  |
| C     | -0.5441866073 | 2.0898389349  | 2.1362900779  |
| C     | -0.8840085919 | 0.8891411399  | 2.7401938543  |
| C     | -2.3382886059 | 0.6247516845  | 2.5363497420  |
| H     | 2.3963685545  | -0.3959732137 | -1.8521511534 |
| H     | 3.3867683577  | 0.4228252970  | 0.9327515060  |
| H     | 4.3200823162  | 0.5471832359  | -0.5481016044 |
| H     | 3.0320291843  | 2.6208641792  | 1.6432026315  |
| H     | 2.2409852974  | 4.9346138175  | 1.2657193657  |
| H     | 1.4883161333  | 5.6431711527  | -0.9992129168 |
| H     | 2.3855637275  | 1.7292022923  | -2.5169346313 |
| H     | 1.5702885743  | 4.0190014009  | -2.8823328685 |
| H     | -0.6710023383 | -3.0428948012 | -0.4307862599 |
| H     | 0.4764074926  | -4.3762961788 | -0.3242369078 |
| H     | 0.6025470474  | -3.2085283751 | -1.6543620138 |
| H     | 0.0913202556  | -2.3024446296 | 2.0441640983  |
| H     | 1.1955333528  | -3.6749605421 | 2.0554443430  |
| H     | 1.8269824677  | -2.0378790091 | 2.3272597762  |
| H     | 2.7641482408  | -4.9179673555 | -0.3992318912 |
| H     | 3.2800455740  | -4.3964263292 | 1.2285465788  |
| H     | 4.3309939191  | -4.1051100551 | -0.1781996708 |
| H     | -1.8451760160 | 1.1504194176  | -0.8538913197 |
| H     | -3.6542105697 | 1.7670015589  | 1.0800328529  |
| H     | -1.6434995344 | 3.4156705355  | 0.7522493235  |
| H     | -2.6282662296 | -0.4243569741 | 2.4749903708  |
| H     | -2.8872331807 | 1.0574384201  | 3.3895382744  |
| H     | -1.3223890305 | -1.4150674213 | 0.7410898580  |
| H     | 0.4104216266  | 2.5948481341  | 2.2100160801  |

```

H -0.2392593210  0.3012312104  3.3845955133
H  0.4227915204  0.7316943564 -0.6205402504
C -3.4656242208 -0.2093710215 -0.5378469555
C -4.1955212329  0.4058296281 -1.5668352038
C -3.9947526219 -1.3629890188  0.0615307719
C -5.4140800836 -0.1202309735 -1.9936760478
H -3.8016077237  1.3002300375 -2.0445369603
C -5.2147357294 -1.8878460876 -0.3625767229
H -3.4591140330 -1.8703671430  0.8595200978
C -5.9286974132 -1.2689352624 -1.3911321755
H -5.9584110720  0.3662528901 -2.7976388672
H -5.6067185152 -2.7839832570  0.1095427231
H -6.8779321437 -1.6806955295 -1.7203059141

```

**Structure: Z\_b2\_exo**

B3LYP/6-31(g), gas phase  
E(RB3LYP) = -1232.00129194

1 imaginary frequency.

Zero-point correction= 0.521819 (Hartree/Particle)  
Thermal correction to Energy= 0.549601  
Thermal correction to Enthalpy= 0.550545  
Thermal correction to Gibbs Free Energy= 0.461423  
Sum of electronic and ZPE= -1231.479473  
Sum of electronic and thermal Energies= -1231.451691  
Sum of electronic and thermal Enthalpies= -1231.450747  
Sum of electronic and thermal Free Energies= -1231.539869

|       | E        | CV        | S         |
|-------|----------|-----------|-----------|
|       | KCal/Mol | Cal/Mol-K | Cal/Mol-K |
| Total | 344.880  | 108.371   | 187.574   |

```

C  2.3035555310  2.9142114590  0.8203083342
C  2.6630538578  2.1288885031 -0.2835172543
C  2.4522661180  2.6517121210 -1.5696670744
C  1.8878523308  3.9155525357 -1.7447879527
C  1.5326556745  4.6874044906 -0.6354272711
C  1.7483663922  4.1857887340  0.6486492674
C  3.3218441182  0.7782236574 -0.0839900867
C  2.6663844749 -0.4219587221 -0.8023207595
N  1.4082608743 -0.9326910817 -0.2188616549
C  1.5089352709 -2.3791088991  0.1748744821
N  2.9079504407 -2.6626864378 -0.1588817273
C  3.5935930549 -1.6309990095 -0.7310920882
C  0.2940116500 -0.1882082318 -0.2359098867
C  1.2675457712 -2.5568780734  1.6830120588
C  0.5782391222 -3.2588034952 -0.6801356254
C  3.5336186619 -3.9599049706  0.0566736227
O  4.7524718822 -1.6368922437 -1.1016675016
C -0.9945708955 -0.4870937845  0.1816382464
C -2.0935424091  0.3777350696 -0.1729478354
C -2.5803343075  1.4532369639  1.3316364973

```

|   |               |               |               |
|---|---------------|---------------|---------------|
| C | -1.2378947472 | 1.9734753195  | 1.8294801115  |
| C | -0.8280293680 | 0.8999655858  | 2.7800245285  |
| C | -1.9337095994 | 0.1566439893  | 3.1429027101  |
| C | -3.0196359193 | 0.5449289587  | 2.3314875729  |
| H | 0.1675232407  | 0.8032356790  | 3.1989366649  |
| H | -1.2160699159 | -1.4412966301 | 0.6390411416  |
| H | -1.9609401793 | -0.6149225209 | 3.9039688203  |
| H | -1.4387896560 | 2.8874988056  | 2.4142117104  |
| H | -4.0226226251 | 0.1378854599  | 2.3962721831  |
| H | -0.4930449402 | 2.2436458886  | 1.0794096136  |
| H | -3.2940621162 | 2.1245463602  | 0.8612131257  |
| H | -1.7778490025 | 1.2187494203  | -0.7928751555 |
| H | 0.7510542671  | -4.3126866119 | -0.4443919405 |
| H | -0.4773580541 | -3.0515748167 | -0.4964667291 |
| H | 0.7843089412  | -3.1040961891 | -1.7431118271 |
| H | 0.2579077387  | -2.2527472603 | 1.9679445346  |
| H | 1.3864867278  | -3.6078688936 | 1.9615262969  |
| H | 1.9877722043  | -1.9628008429 | 2.2531293164  |
| H | 3.0522147866  | -4.7429660917 | -0.5381152219 |
| H | 3.5080086254  | -4.2421276629 | 1.1139345098  |
| H | 4.5726496652  | -3.8623937352 | -0.2615295687 |
| H | 2.5046996930  | -0.1739966295 | -1.8584625002 |
| H | 2.4898839411  | 2.5395909965  | 1.8249105712  |
| H | 1.4987196053  | 4.7876827785  | 1.5184253175  |
| H | 1.1074837397  | 5.6774092277  | -0.7723151100 |
| H | 1.7423221895  | 4.3053954887  | -2.7482710178 |
| H | 2.7526177646  | 2.0792688119  | -2.4447865175 |
| H | 4.3480646058  | 0.8038486205  | -0.4724286374 |
| H | 3.4007494041  | 0.5493454264  | 0.9851674964  |
| H | 0.4546712736  | 0.7898056216  | -0.6841862433 |
| C | -3.3792211097 | -0.2051204808 | -0.6758962749 |
| C | -4.0817562861 | 0.4861378077  | -1.6743375764 |
| C | -3.9070231411 | -1.4149928353 | -0.1976726156 |
| C | -5.2754869403 | -0.0197148130 | -2.1903056321 |
| H | -3.6866945199 | 1.4242460699  | -2.0583598352 |
| C | -5.0998381047 | -1.9197951098 | -0.7105000028 |
| H | -3.3909632511 | -1.9721076842 | 0.5803635933  |
| C | -5.7880049981 | -1.2241779195 | -1.7093035108 |
| H | -5.8013318663 | 0.5274774206  | -2.9670027073 |
| H | -5.4933257168 | -2.8590595307 | -0.3327834338 |
| H | -6.7172839701 | -1.6205750638 | -2.1071855516 |

**Structure: Z\_c2\_endo**

B3LYP/6-31(g), gas phase  
E(RB3LYP) = -1231.99543896

1 imaginary frequency.

Zero-point correction= 0.522117 (Hartree/Particle)  
Thermal correction to Energy= 0.549828  
Thermal correction to Enthalpy= 0.550773  
Thermal correction to Gibbs Free Energy= 0.461175  
Sum of electronic and ZPE= -1231.473322

Sum of electronic and thermal Energies= -1231.445611  
 Sum of electronic and thermal Enthalpies= -1231.444666  
 Sum of electronic and thermal Free Energies= -1231.534263

|       | E             | CV            | S             |
|-------|---------------|---------------|---------------|
|       | KCal/Mol      | Cal/Mol-K     | Cal/Mol-K     |
| Total | 345.022       | 108.107       | 188.573       |
| C     | 1.7277548118  | -2.8306788398 | 1.4192209841  |
| C     | 2.8667958394  | -1.9707391950 | 1.2758914672  |
| C     | 2.7712751853  | -1.0198031607 | 2.4688268087  |
| C     | 1.3043553037  | -1.0455946470 | 2.7412985664  |
| C     | 0.7650466841  | -2.2204455950 | 2.2317941045  |
| C     | 1.5853512607  | 0.1630525201  | 0.2258311549  |
| C     | 2.4874662804  | -0.9066846741 | -0.1764857588 |
| C     | 0.2285310479  | 0.1039150113  | -0.0594922301 |
| N     | -0.7125878769 | 1.0520727013  | -0.0205596129 |
| C     | -2.1154482113 | 0.7177768502  | -0.3528296995 |
| C     | -2.7936332661 | 2.0833212874  | -0.3473321285 |
| N     | -1.8610079472 | 3.0246361520  | -0.0164559515 |
| C     | -0.5069901311 | 2.5172688087  | 0.2213195498  |
| C     | -2.7868605533 | -0.2848937364 | 0.6358027164  |
| C     | -3.7129357153 | -1.2820843531 | -0.0356047225 |
| C     | -3.4129384050 | -2.6496366189 | 0.0005326172  |
| C     | -4.2509708459 | -3.5839561233 | -0.6106719960 |
| C     | -5.4021877413 | -3.1567387206 | -1.2724034016 |
| C     | -5.7090327163 | -1.7948470648 | -1.3158858976 |
| C     | -4.8737872582 | -0.8616583412 | -0.7014047593 |
| C     | 0.4743372068  | 3.1169242860  | -0.8007027896 |
| C     | -0.0804509924 | 2.7848981797  | 1.6752587959  |
| C     | -2.2130168343 | 4.4349236981  | 0.0791707042  |
| O     | -3.9734984642 | 2.2859633159  | -0.5721309124 |
| H     | 2.0184498636  | 1.0811450052  | 0.5983985604  |
| H     | 2.0114465157  | -1.6173129530 | -0.8511190526 |
| H     | 3.8254966885  | -2.4131702333 | 1.0192544990  |
| H     | 3.2822800839  | -1.5005112562 | 3.3200234659  |
| H     | -0.2413682398 | -2.5837227317 | 2.4064145608  |
| H     | 0.7852148849  | -0.3369300782 | 3.3773792974  |
| H     | 3.2178433709  | -0.0332926037 | 2.3465856263  |
| H     | 1.5927449697  | -3.7658326435 | 0.8844271592  |
| H     | -0.0212732646 | 3.8619858613  | 1.8556795191  |
| H     | 0.9045881755  | 2.3648232804  | 1.8928123682  |
| H     | -0.8104959372 | 2.3573484071  | 2.3689444773  |
| H     | -1.6567918169 | 5.0357730650  | -0.6472241952 |
| H     | -2.0319154188 | 4.8242898845  | 1.0859880797  |
| H     | -3.2787209973 | 4.5063334366  | -0.1427421579 |
| H     | 1.4781630180  | 2.6992724443  | -0.7026630577 |
| H     | 0.1176256661  | 2.9337470465  | -1.8181813582 |
| H     | 0.5511774608  | 4.1971201378  | -0.6483238777 |
| H     | -2.1561549045 | 0.3053119909  | -1.3677584268 |
| H     | -1.9923375902 | -0.8318811090 | 1.1563646964  |
| H     | -3.3251802746 | 0.2859297918  | 1.4018569426  |
| H     | -5.1143388220 | 0.1966750724  | -0.7403241767 |
| H     | -6.6057096842 | -1.4558267793 | -1.8269960335 |
| H     | -6.0578575123 | -3.8800760648 | -1.7485491382 |
| H     | -4.0062922936 | -4.6416854495 | -0.5668261497 |

H -2.5202349977 -2.9924754041 0.5222017380  
H -0.1595639070 -0.8563925997 -0.3972169286  
C 3.8431591649 -0.5243374665 -0.7140870547  
C 4.3817850645 -1.2809269192 -1.7660397948  
C 4.5962830195 0.5422933437 -0.1994859527  
C 5.6333509334 -0.9746230352 -2.2989502379  
H 3.8125838932 -2.1113759237 -2.1778538739  
C 5.8491113778 0.8469690757 -0.7297146477  
H 4.2124450219 1.1511331250 0.6147373294  
C 6.3717769765 0.0900720372 -1.7808072525  
H 6.0285428821 -1.5662520744 -3.1193263880  
H 6.4168102873 1.6786516468 -0.3228454661  
H 7.3471606810 0.3303139318 -2.1929267077

**Structure: Z\_c2\_exo**

B3LYP/6-31(g), gas phase  
E(RB3LYP) = -1231.99662786

1 imaginary frequency.

Zero-point correction= 0.521744 (Hartree/Particle)  
Thermal correction to Energy= 0.549568  
Thermal correction to Enthalpy= 0.550512  
Thermal correction to Gibbs Free Energy= 0.460504  
Sum of electronic and ZPE= -1231.474884  
Sum of electronic and thermal Energies= -1231.447060  
Sum of electronic and thermal Enthalpies= -1231.446116  
Sum of electronic and thermal Free Energies= -1231.536124

|       | E        | CV        | S         |
|-------|----------|-----------|-----------|
|       | KCal/Mol | Cal/Mol-K | Cal/Mol-K |
| Total | 344.859  | 108.324   | 189.439   |

C 1.4317056999 -2.0515938972 2.0941520572  
C 1.3093534654 -0.8079463116 2.9104556120  
C 2.5640527256 -0.2673870076 3.1138795376  
C 3.4865918977 -0.9583398683 2.3026718730  
C 2.8023017092 -1.8684327017 1.4514148704  
C 2.4064184641 -0.9072727890 -0.1425680328  
C 1.5210998387 0.1933573525 0.1576379985  
C 0.1607518729 0.0936707641 -0.0924376611  
N -0.7992863890 1.0246053352 -0.0927406503  
C -2.1974449938 0.6426939407 -0.3874327044  
C -2.9056646331 1.9907987545 -0.4507010330  
N -1.9925387419 2.9684493791 -0.1757277659  
C -0.6241491994 2.5040110356 0.0696845889  
C -2.8388222543 -0.3138284475 0.6661582340  
C -3.7040788314 -1.4018447538 0.0592506836  
C -4.8326279671 -1.0825520301 -0.7104815191  
C -5.6164066706 -2.0956853482 -1.2628963296  
C -5.2898042066 -3.4373870306 -1.0523226413  
C -4.1713387006 -3.7634764872 -0.2852538628  
C -3.3839083596 -2.7496692607 0.2636571821

```

C -0.1827369152 2.8526154427 1.5015996512
C 0.3286722807 3.0728560626 -0.9962540738
C -2.3743559401 4.3736974981 -0.1463703474
O -4.0916150593 2.1526159398 -0.6770602532
H 1.9539575245 1.1412425488 0.4466612554
H 0.3883693402 -0.4648729922 3.3689474050
H 2.7994969560 0.5660374536 3.7658777521
H 4.5516381651 -0.7589790845 2.2609230456
H 3.3348885777 -2.7209433829 1.0376260349
H 1.8888724391 -1.7364906750 -0.6286063058
H 1.5037549680 -2.9087478003 2.7846447927
H 0.5967394402 -2.2585146390 1.4224920196
H 0.3660689161 4.1626238699 -0.9124006337
H 1.3483216829 2.7005546779 -0.8807924985
H -0.0270141625 2.8133404726 -1.9973539654
H -0.1100253048 3.9375777990 1.6194876033
H -0.9114231874 2.4737294068 2.2243763604
H 0.7975670267 2.4299269956 1.7346588036
H -2.1604497303 4.8234113713 0.8282875889
H -1.8633974289 4.9445415369 -0.9283645637
H -3.4496492821 4.4093960072 -0.3270826214
H -2.2425404783 0.1722961593 -1.3765921008
H -3.4214095309 0.2875756313 1.3742947616
H -2.5192467904 -3.0133510483 0.8711740196
H -3.9124546737 -4.8042538133 -0.1111169355
H -5.9054553025 -4.2231730038 -1.4805265468
H -6.4888644487 -1.8351180680 -1.8554807048
H -5.0918410103 -0.0398639873 -0.8727252401
H -2.0316299092 -0.7783930952 1.2445107178
H -0.2175312616 -0.8900579564 -0.3684531840
C 3.7289041191 -0.6463958091 -0.7981315561
C 4.2003206341 -1.5673614297 -1.7455570904
C 4.5121610825 0.4822288449 -0.5091275841
C 5.4175760023 -1.3635729398 -2.3966853816
H 3.6056637472 -2.4467299905 -1.9836309322
C 5.7285414111 0.6853814739 -1.1569965923
H 4.1791587666 1.2114000482 0.2254507123
C 6.1851098073 -0.2366720165 -2.1038078799
H 5.7623928607 -2.0846556197 -3.1317078473
H 6.3213099964 1.5655444284 -0.9255164480
H 7.1333439454 -0.0753689454 -2.6075766739

```

### Listing of Subprograms for Program Suite PROGDYN

A full description and listing of most of the subprograms of PROGDYN can be found in the Supporting Information of a recent publication (S10). We describe here only the differences versus the programs in S19, and this description is facilitated by a description of the overall structure of PROGDYN.

The master control program for dynamics, in the form of a Unix Shell Script, is called *progdynstarterHP*.

*progdynstarterHP* takes as necessary input files:

*freqinHP* - This is the standard output from a Gaussian 98, 03, or 09 frequency calculation using freq=hpmodes. For isotopically labeled compounds, use freq=(hpmodes,readisotopes).

*progdyn.conf* – This is a file giving a variety of configuration options, called on by many of the subprograms. *progdyn.conf* contains explanations of many of the program options.

*progdynstarterHP* takes as optional input files:

*isomernumber* – A number in file *isomernumber* provides a start for numbering runs.

*detour* – A signal file that, by existing, signals the program to do a side calculations

*nogo* – A signal file that, by existing, signals the program to stop between points

*methodfile* – A file that contains lines to be added to the end of each *g09.com* input file, such as lines that call for an NMR calculation

*progdynstarterHP* calls the following programs:

*proggenHP* – An awk program that starts a trajectory, giving each mode its zero point energy (if a quasiclassical calculation) plus random additional excitations depending on the temperature.

*prog1stpoint* – Awk program that creates the first Gaussian input file for each run

*prog2ndpoint* – Awk program that creates the second Gaussian input file for each run. *prog2ndpoint* also checks the energy of the first point to see if it fits with the desired energy, and aborts the run if it does not by creating appropriate output in file *Echeck*

*progdynb* – Creates subsequent Gaussian input files until run is completed, used the awk

*proganal* – A program to analyze the latest point and see if a run is done. This program must be redone for each new system. Elaborate changes are often programmed into *proganal*, such as the automatic changing of configuration variables. *proganal* creates the output to *dynfollowfile* and *NMRLlist* or *NMRLlistdis*

*randgen* – A program that generates random numbers between 0 and 1. These are generated all at once and stored in a file for use by *proggenHP*.

*progdynstarterHP* has the following output files:

*isomernumber* – A running tab of the trajectory number

*runpointnumber* – a running tab of the point in the trajectory

*Echeck* – output form where *prog2ndpoint* checks the energy of the trajectory to see if it fits with the desired energy

*geoRecord* – A record of all of the *geoPlusVel* files.

*geoPlusVel* – Created by *proggen*, this gives the starting positions, velocities, isotopic masses, excitations of the normal modes, and initial displacements of the normal modes for current run.

*g09.com* – Created by *prog1stpoint*, *prog2ndpoint*, and *progdynb*, this is the latest input file for Gaussian09 for current run and latest point.

*olddynrun* and *olderdynrun* – files containing the last two outputs from Gaussian, for creation of the next point  
*traj*, *traj1*, *traj2*, *traj3*, etc. – files containing the geometries and energies for each trajectory, numbered by the *isomernumber*, in a format suitable for reading by Molden.

*dyn* – A record of the Gaussian outputs.

*dynfollowfile* – A short record of the runs and their results.

*NMRLlist* or *NMRLlistdis* – output of NMR predictions at each point in a trajectory

*skipstart* – A signal file that, by existing, tells *progdynstarterHP* that we are in the middle of a run. For trajectories that are propagated forward and backward in time, *skipstart* keeps track of whether one is in the forward or reverse part.

*diagnostics* – optional output that follows which subprograms are running and configuration variables, decided by variable in *progdyn.conf*

*vellist* – optional output that list the velocities of each atom, decided by variable in *progdyn.conf*

A number of files starting with '*temp*' are created then later erased.

The control program *progdynstarterHP* and the subprograms *proggenHP*, *prog1stpoint*, *prog2ndpoint*, *progdynb*, and *randgen* are algorithmically identical to those listed in S19. The only differences are in lines that contain paths to input and output files in *progdynstarterHP*, and these are lines that are routinely modified in changing computer systems.

The awk program *proganal* differed for the current study. An example listing of *proganalis* given below, along with a description of how *proganal* was varied for the various studies.

The configuration file named *progdyn.conf* also differed for the current study. An example listing of *progdyn.conf* is given below, along with a description of how *progdyn.conf* was varied for the various studies.

## Program proganal

The version of proganal shown below was used for the trajectories for the reaction of **1** with **2**. For the reactions of **7**, proganal was modified to keep track of the interatomic distances in the forming bonds (using lines "short=Distance(1,11)" and "long=Distance(6,10)"), and the stopping criteria for recrossing and for product formation were "if ((short>2.3) && (long>2.5)) {" and "if ((short<1.8) && (long<2.0)) {" , respectively

```

BEGIN {
firsttitle=1
getline < "isomernumber"
isomer=$1
}
/ dichloroket/ {
  if (firsttitle==1) {
    printf("%s %s %s %s %s %s %s %s ",$1,$2,$3,$4,$6,$7,$8)
    runpoint=$6
  }
  firsttitle++
}
/Standard orientation/,/Rotational constants/ {
  if (($1>.5) && ($1<30)) {
    A[$1]=$4;B[$1]=$5;C[$1]=$6
  }
}

END {
  C2C5=Distance(2,5)
  C4C5=Distance(4,5)
  C2C7=Distance(2,7)
  C4C7=Distance(4,7)
  printf("%s %.3f %s %.3f %s %.3f %s %.3f
", "C2C5",C2C5, "C2C7",C2C7, "C4C5",C4C5, "C4C7",C4C7)
  if (runpoint>500) {
    print "Too many points. XXXX"
  }
  if ((C2C5>2.2) && (C4C5>2.2) && (C2C5<3.0)) {
    print "Recrossed XXXX"
  }
  if ((C2C5>3.0) || (C2C5<1.2) || (C4C5<1.2)) {
    print "Probably bad trajectory XXXX"
  }
  if ((C2C5<1.8) && (C4C7<2.3)) {
    print "Formed light cyclobutanone product XXXX"
  }
  if ((C4C5<1.8) && (C2C7<2.3)) {
    print "Formed heavy cyclobutanone product XXXX"
  }
}

```



```

    }
    system("date '+%b:%d:%Y %T'")
    system("tail -1 Echeck | grep XXXX")
}

function Distance(Atom1,Atom2) {
    return sqrt((A[Atom1]-A[Atom2])^2 + (B[Atom1]-B[Atom2])^2 + (C[Atom1]-C[Atom2])^2)
}

function Angle(Atom1,Atom2,Atom3) {
    value=((-
    Distance(Atom1,Atom3)^2+Distance(Atom1,Atom2)^2+Distance(Atom2,Atom3)^2)/(2*Distanc
    e(Atom1,Atom2)*Distance(Atom2,Atom3)))
    return acos(value)
}

function asin(x) { return (180/3.141592)*atan2(x, sqrt(1-x*x)) }

function acos(x) { return (180/3.141592)*atan2(sqrt(1-x*x), x) }

function atan(x) { return (180/3.141592)*atan2(x,1) }

function Dihedral(Atom1,Atom2,Atom3,Atom4) {
    B1x=A[Atom2]-A[Atom1]
    B1y=B[Atom2]-B[Atom1]
    B1z=C[Atom2]-C[Atom1]
    B2x=A[Atom3]-A[Atom2]
    B2y=B[Atom3]-B[Atom2]
    B2z=C[Atom3]-C[Atom2]
    B3x=A[Atom4]-A[Atom3]
    B3y=B[Atom4]-B[Atom3]
    B3z=C[Atom4]-C[Atom3]
    modB2=sqrt((B2x^2)+(B2y^2)+(B2z^2))
    # yAx is x-coord. etc of modulus of B2 times B1
    yAx=modB2*(B1x)
    yAy=modB2*(B1y)
    yAz=modB2*(B1z)
    # CP2 is the crossproduct of B2 and B3
    CP2x=(B2y*B3z)-(B2z*B3y)
    CP2y=(B2z*B3x)-(B2x*B3z)
    CP2z=(B2x*B3y)-(B2y*B3x)
    termY=((yAx*CP2x)+(yAy*CP2y)+(yAz*CP2z))
    # CP is the crossproduct of B1 and B2
    CPx=(B1y*B2z)-(B1z*B2y)
    CPy=(B1z*B2x)-(B1x*B2z)
    CPz=(B1x*B2y)-(B1y*B2x)
}

```

```

termX=((CPx*CP2x)+(CPy*CP2y)+(CPz*CP2z))
dihed4=(180/3.141592)*atan2(termY,termX)
return dihed4
}

```

```

function killdyn(isomer) {
  system("rm -f dyn")
}

```

## progdyn.conf

The progdyn.conf below is the one used for quasiclassical trajectories for the reaction of **1** with **2** with a  $^{14}\text{C}$  in an olefinic carbon of **1**. Other calculations would differ in obvious ways in the lines labeled title and charge. The line labeled method was changed to "method B3LYP/6-31G\*" and the lines labeled method3 and controlphase were commented out for reactions of **8**<sup>‡</sup>. The line labeled classical was changed from "classical 0" to "classical 1" for fully classical simulations.

```

#This is the configuration file for PROGDYN. This file is read by progdynstarterHP and
# the awk programs proggenHP, prog1stpoint, prog2ndpoint, and progdynb.
#The programs won't read anything past the first blank line,
#and this file must end with a blank line.
#The program has a number of default values but they are unlikely to be what you want.
#Do not delete lines - rather, comment out lines for unwanted options.
#The values here are read repeatedly and most can be changed in the middle of running jobs
#***The keywords are case sensitive. The following keywords should always be defined:***
#***method, charge, multiplicity, memory, processors, title
#*** method --The following word is copied exactly to the gaussian input file.
method mpwpw91/6-31G*
#*** method2 --The options here are restricted, unrestricted, and read. restricted is the default
#If the method is U..., put unrestricted here and the .com files will have in them guess=mix.
#If you put read here, the .com files will contain guess=tcheck, which sometimes makes things faster, sometimes not.
#The use of read requires a specifically defined checkpoint file name using the keyword checkpoint.
method2 restricted
charge 0
multiplicity 1
processors 2
#*** memory --The following "word" is copied exactly to the gaussian input file after %mem=.
memory 200mw
#*** killcheck and checkpoint -- You can use a specifically defined checkpoint file name by putting
#the name after the keyword checkpoint. This is necessary if you use the read option with method2.
#Defined checkpoint names are an unnecessary modest hassle and if you do not want to bother, use killcheck 1
killcheck 1
#checkpoint dyn20.chk
#*** diagnostics -- 0 prints out nothing extra, 1 (default) prints out extra stuff to a
#file "diagnostics", 2 adds more stuff, 3 adds velocities to a file "vellist"
#4 adds the apparent temperature to vellist, but this is meaningless with quasiclassical calculations
diagnostics 0
#*** title -- the title keyword must be followed by exactly four words
title dichloro ketene cis-but mpw1k 298dis2qc44
#*** initialdis -- 0 (default) turns off displacement of the normal modes, so that all trajectories start from the same place
# and only the energies and signs of the motion in the modes are randomized
# 1 gives a flat distribution of displacements where all of the possible values are equally likely
# 2 (recommended) gives a QM-like gaussian distribution of displacements, so that displacements in the middle are more likely
that
# those at the end by 1/e

```

```

initialdis 2
*** timestep -- this is the time between points in the trajectory. Typical values would be 1E-15 or 0.5E-15 or 0.25E-15
timestep 1E-15
*** scaling -- this lets you scale the gaussian frequencies by a constant
scaling 1.0
temperature 298.15
*** method3, method4, method5, and method6 -- These keywords let you add extra lines to the gaussian input file.
#method3 and method4 add lines at the top of the input after the lines defining the method, and
#this is useful to implement things like the iop for mPW1k
#method5 and method6 add lines after the geometry, after a blank line of course
#only a single term with no spaces can be added, one per method line. Here are some examples to uncomment if needed
method3 IOp(3/76=0572004280)
#method3 scrf=(pcm,Solvent=water)
#add the line below with big structures to get it to put out the distance matrix and the input orientation
#method3 iop(2/9=2000)
#method4 scrf=(pcm,solvent=dms0,read)
#method5 radii=bondi
#method6
*** methodfile -- This keyword lets you add more complicated endings to gaussian input files
#such as a gen basis set. Put after the keyword the number of lines in a file you create called
#methodfile that contains the test you want to add to the end of the gaussian input
methodfile 0
*** numimag --This tells the program the number of imaginary frequencies in the starting structure.
#if 0, treats as ground state and direction of all modes is random
#if 1, motion along the reaction coordinate will start out in the direction defined by searchdir
#if 2, only lowest freq will go direction of searchdir and other imag mode will go in random direction
numimag 1
*** searchdir -- This keyword says what direction to follow the mode associated with the imaginary frequency.
#The choices are "negative" and "positive". Positive moves in the direction defined in the gaussian frequency calculation
#for the imaginary frequency, while negative moves in the opposite direction. The correct choice can be made either
#by a careful inspection of the normal modes and standard orientation geometry, or by trial and error.
searchdir negative
*** classical -- for quassiclassical dynamics, the default, use 0. for classical dynamics, use 1
#if there are no normal modes and the velocities are to be generated from scratch, use classical 2
classical 0
*** DRP, saddlepoint, and maxAtomMove --to run a DRP use 'DRP 1' in the line below, otherwise leave it at 0 or comment it
out
#the treatment of starting saddlepoints is not yet implemented so use saddlepoint no
#if DRP shows oscillations then decrease maxAtomMove
#DRP 1
#saddlepoint no
#maxAtomMove 0.01
*** cannonball -- The program can "fire" a trajectory from a starting position toward a particular target, such as toward
#a ts. To use this, make a file cannontraj with numAtom lines and three numbers per line that defines the vector
#for firing the trajectory, relative to the starting geometry's standard orientation. The number following cannonball sets
#the extra energy being put into the structure in kcal/mol
#cannonball 10
*** keepevery --This tells the program how often to write the gaussian output file to file dyn, after the first two points.
#Use 1 for most dynamics to start with, but use a higher number to save on disk space or molden loading time.
keepevery 10
*** highlevel --For ONIOM jobs, the following line states the number of highlevel atoms,
#which must come before the medium level atoms. Use some high value such as 999 if not using ONIOM
highlevel 999
*** fixedatom1, fixedatom2, fixedatom3, and fixedatom4 - These fix atoms in space.
#Fixing one atom serves no useful purpose and messes things up, while fixing two atoms
#fixes one distance and fixing three has the effect of fixing three distances, not just two
#in current form fixed atoms only are meant to work with no displacements, that is, initialdis=0
#fixedatom1 2
#fixedatom2 3
#fixedatom3 19
*** boxon and boxsize - With boxon 1, a cubic box is set such that atoms that reach the edge
#are reflected back toward the middle. Useful for dynamics with solvent molecules. This is a crude

```

```

#implementation that is ok for a few thousand femtoseconds but will not conserve energy long term.
#Set the box size so as to fit the entire initial molecule but not have too much extra room.
#The dimensions of the box are two times the boxsize, e.g. boxsize 7.5 leads to a box that is 15 x 15 x 15 angstroms
boxon 0
boxsize 7.5
**** displacements -- This keyword lets you set the initialdis of particular modes by using a series of lines of the format
# displacements NumberOfMode InitialDisForThatMode, as in the example below. You should be able to do as many of these as
  you like
# you might consider this for rotations where a straight-line displacement goes wrong at large displacements
# The choices for InitialDisForThatMode are 0, 1, 2, and 10, where 10 does the same thing as 0 but is maintained for now
  because
# a previous version of the program had a bug that made 0 not work.
displacements 2 0
**** etolerance --This sets the allowable difference between the desired energy in a trajectory and the actual
#energy, known after point 1 from the potential energy + the kinetic energy in the initial velocities.
#The unit is kcal/mol and 1 is a normal value for mid-sized organic systems. For very large and floppy molecules, a larger value
#may be needed, but the value must stay way below the average thermal energy in the molecule (not counting zpe).
#If initialdis is not 0 and few trajectories are being rejected, decrease the value.
etolerance 1
**** controlphase --It is sometimes useful to set the phase of particular modes in the initialization of trajectories.
#The format is controlphase numberOfModeToControl positive or controlphase numberOfModeToControl negative.
controlphase 3 positive
**** damping -- The damping keyword lets you add or subtract energy from the system at each point, by multiplying the
  velocities
#by the damping factor. A damping of 1 has no effect, and since you mostly want to change the energy slowly, normal values
  range
#from 0.95 to 1.05. The use of damping lets one do simulated annealing - you add energy until the structure is moving enough
#to sample the kinds of possibilities you are interested in, then you take away the energy slowly.
damping 1
**** reversetraj --This keyword sets the trajectories so that both directions from a transition state are explored.
#reversetraj true

#updated Aug 9, 2007 to include the possibility of classical dynamics by the keyword classical
#updated Jan 2008 to include fixed atoms, ONIOM jobs, keepevery, and box size
#update Feb 2008 to include methodfile parameter
# updated Nov 2008 to allow for start without an initial freq calc using classical = 2
# update Aug 2010 to include etolerance, damping controlphase and reversetraj

```

## Sample Input Files

### Gaussrate

p.dat

\*General

```

TITLE
MacMillan Diels-Alder phenyl exo full
ultrafine, sstep 0.01, pm
END

```

ATOMS

```

1 C
2 C
3 H
4 C
5 H

```

6 C  
7 C  
8 H  
9 H  
10 C  
11 C  
12 C  
13 H  
14 C  
15 H  
16 N  
17 H  
18 C  
19 C  
20 C  
21 H  
22 C  
23 N  
24 C  
25 C  
26 C  
27 O  
28 H  
29 H  
30 C  
31 C  
32 C  
33 C  
34 C  
35 H  
36 H  
37 H  
38 H  
39 H  
40 H  
41 C  
42 H  
43 H  
44 H  
45 H  
46 H  
47 H  
48 H  
49 H  
50 H  
51 H  
52 C  
53 C  
54 C  
55 C  
56 C

57 H  
58 H  
59 H  
60 H  
61 H  
END

NOSUPERMOL

INPUNIT AU

MDMOVIE ON

\*OPTIMIZATION

OPTMIN OHOOK  
OPTTS OHOOK

\*SECOND

HESSCAL HHOOK

\*REACT1

INITGEO HOOKS  
SPECIES NONLINRP  
GEOM

1  
2  
3  
4  
5  
6  
7  
8  
9  
10  
11  
12  
13  
14  
15  
16  
17  
18  
19  
20  
21  
22  
23  
24  
25

26  
27  
28  
29  
30  
31  
32  
33  
34  
35  
36  
37  
38  
39  
40  
41  
42  
43  
44  
45  
46  
47  
48  
49  
50  
51  
52  
53  
54  
55  
56  
57  
58  
59  
60  
61

END

# end of react1 section

\*PROD1

INITGEO HOOKS

SPECIES NONLINRP

GEOM

1  
2  
3  
4  
5  
6  
7  
8

9  
10  
11  
12  
13  
14  
15  
16  
17  
18  
19  
20  
21  
22  
23  
24  
25  
26  
27  
28  
29  
30  
31  
32  
33  
34  
35  
36  
37  
38  
39  
40  
41  
42  
43  
44  
45  
46  
47  
48  
49  
50  
51  
52  
53  
54  
55  
56  
57  
58  
59



60  
61  
END

# end of prod1 section

\*START  
SPECIES NONLINTS  
INITGEO HOOKS  
GEOM

1  
2  
3  
4  
5  
6  
7  
8  
9  
10  
11  
12  
13  
14  
15  
16  
17  
18  
19  
20  
21  
22  
23  
24  
25  
26  
27  
28  
29  
30  
31  
32  
33  
34  
35  
36  
37  
38  
39  
40  
41

42  
43  
44  
45  
46  
47  
48  
49  
50  
51  
52  
53  
54  
55  
56  
57  
58  
59  
60  
61  
END  
# end of start section

\*PATH

SCALEMASS 1.00

INTMU 3  
SSTEP 0.01  
INH 9

SRANGE  
SLP 3.59  
SLM -1.5  
END

RPM pagem

SIGN REACTANT

IDIRECT 1

COORD CURV3

INTDEF  
7-6 10-6 11-1 4-1-2 7-6-4 10-6-7 11-1-2 12-10-11 14-11-1  
2-1 3-1 4-1 5-2 6-4 7-2 8-6 9-7 10-1 11-10 12-10 13-11 14-11  
15-10 16-12 17-12 18-16 19-16 20-18 21-18 22-18 23-19 24-19  
25-19 26-23 27-20 28-4 29-4 30-14 31-30 32-31 33-32 34-14 35-30  
36-31 37-32 38-33 39-34 40-22 41-22 42-22 43-24 44-24 45-24  
46-25 47-25 48-25 49-26 50-26 51-26 52-41 53-52 54-53 55-54

56-41 57-52 58-53 59-54 60-55 61-56 3-1-2 4-1-3 5-2-1 6-4-1  
7-2-1 8-6-4 9-7-2 10-1-2 11-10-1 12-10-1 13-11-10 14-11-10  
15-10-11 16-12-10 17-12-10 18-16-12 19-16-12 20-18-16 21-18-16  
22-18-16 23-19-16 24-19-16 25-19-16 26-23-19 27-20-18 28-4-1  
29-4-1 30-14-11 31-30-14 32-31-30 33-32-31 34-14-11 35-30-14  
36-31-30 37-32-31 38-33-32 39-34-14 40-22-18 41-22-18 42-22-18  
43-24-19 44-24-19 45-24-19 46-25-19 47-25-19 48-25-19 49-26-23  
50-26-23 51-26-23 52-41-22 53-52-41 54-53-52 55-54-53 56-41-22  
57-52-41 58-53-52 59-54-53 60-55-54 61-56-41 4-1-3-2 5-2-1-4  
6-4-1-2 7-2-1-4 8-6-4-1 9-7-2-1 10-1-2-7 11-10-1-2 12-10-1-2  
13-11-10-12 14-11-10-12 15-10-11-14 16-12-10-11 17-12-10-11  
18-16-12-10 19-16-12-10 20-18-16-12 21-18-16-12 22-18-16-12  
23-19-16-12 24-19-16-12 25-19-16-12 26-23-19-16 27-20-18-16  
28-4-1-2 29-4-1-2 30-14-11-10 31-30-14-11 32-31-30-14  
33-32-31-30 34-14-11-10 35-30-14-11 36-31-30-14 37-32-31-30  
38-33-32-31 39-34-14-11 40-22-18-16 41-22-18-16 42-22-18-16  
43-24-19-16 44-24-19-16 45-24-19-16 46-25-19-16 47-25-19-16  
48-25-19-16 49-26-23-19 50-26-23-19 51-26-23-19 52-41-22-18  
53-52-41-22 54-53-52-41 55-54-53-52 56-41-22-18 57-52-41-22  
58-53-52-41 59-54-53-52 60-55-54-53 61-56-41-22  
END

PRPATH  
COORD 1 11  
INTERVAL 1  
XMOL  
END

SPECSTOP  
CURVE vag  
POINT savegrid  
PERCENTDOWN 95.  
END

\*TUNNEL

QUAD  
NQE 40  
NQTH 40  
END

SCT

\*RATE

FORWARDK

SIGMAF 1  
CVT  
CUS 2

```
PRDELG ON
PRGIGT ON
ICVT ON
# MUVT ON
# MUVTOPT
# prenergy 4
# niter 30
# END
```

```
TEMP
# 200.
  298.15
  398.15
END
```

**p.70**

```
*GRGENERAL
```

```
GRRESTART
RSTTOL 0.000001
```

```
*GRSTART
```

```
CHARGE 1
MULTIPLICITY 1
```

```
*GRREACT1
```

```
CHARGE 1
MULTIPLICITY 1
```

```
*GRPROD1
```

```
CHARGE 1
MULTIPLICITY 1
```

```
*GRCOMMON
```

```
GRENER
#p B3LYP/6-31G* UNITS=AU FCHK NOSYMM
scf=tight integral(grid=ultrafinegrid) guess=tcheck
END
```

```
GRFIRST
#p B3LYP/6-31G* FORCE UNITS=AU FCHK NOSYMM
scf=tight integral(grid=ultrafinegrid) guess=tcheck
END
```

```
GRSEC
#p B3LYP/6-31G* FREQ=NORAMAN UNITS=AU FCHK NOSYMM
scf=tight integral(grid=ultrafinegrid) guess=tcheck
END
```

```
GRLINK0
%chk=g09.chk
%nproc=8
%mem=4gb
END
```

```
      p.71
%nproc=8
%mem=4gb
%chk=g09.chk
#p B3LYP/6-31G* opt fchk NOSYMM
scf=tight integral(grid=ultrafine)
```

sm for macmillan da phenyl full exo

```
1 1
C,0,4.1866583914,-0.7146486672,-0.0912112322
C,0,3.2767651126,-1.6820165193,-0.3447593687
H,0,4.9342286506,-0.3273038582,-0.7742773043
C,0,4.0616808997,-0.281046592,1.3454191089
H,0,3.1502016242,-2.2209443893,-1.2781278696
C,0,2.9282301433,-1.1273159591,1.864281676
C,0,2.4943985494,-1.9404067045,0.8735286935
H,0,2.5912061349,-1.1197680648,2.8948838982
H,0,1.7279581113,-2.705005966,0.9551912327
C,0,-0.0892002348,1.5832606645,-0.8770843488
C,0,1.0327064819,1.2689123132,-1.6040787498
C,0,-0.2753587311,0.9955637948,0.3959215055
H,0,1.7473665331,0.5833017863,-1.1464014555
C,0,1.3904443742,1.7356555462,-2.9188836632
H,0,-0.8413838096,2.2555644484,-1.2717359388
N,0,-1.2908969627,1.1921181903,1.2030612032
H,0,0.4806018786,0.2926471686,0.7438261935
C,0,-2.4249863725,2.1027972819,0.9492195913
C,0,-1.4602659881,0.4027180512,2.4854303625
C,0,-3.3895583281,1.7592382256,2.0829989478
H,0,-2.8926941835,1.8317205409,-0.0047824737
C,0,-2.1004598297,3.6225805547,0.9382360717
N,0,-2.8007935818,0.8268391395,2.8859212931
```

C,0,-1.4236351022,-1.1038782645,2.1852858625  
C,0,-0.3908251382,0.8077844201,3.5096855813  
C,0,-3.4566073895,0.3407367351,4.0926891043  
O,0,-4.4825038293,2.2726036193,2.2310607027  
H,0,3.884331103,0.7995834314,1.4554457631  
H,0,4.9901043055,-0.4832415778,1.9018005324  
C,0,2.6057110032,1.2751658134,-3.476475391  
C,0,3.0069437263,1.6858703563,-4.7417084482  
C,0,2.201488737,2.563669797,-5.4726100088  
C,0,0.9932516004,3.0312565902,-4.9364606384  
C,0,0.5889271479,2.6243723316,-3.6742277157  
H,0,3.2252602157,0.5934524092,-2.9000928167  
H,0,3.9415775858,1.3261093971,-5.1602389319  
H,0,2.5120483174,2.8863010405,-6.4620129422  
H,0,0.3732653692,3.7125513529,-5.5106903604  
H,0,-0.3493715053,2.9937602694,-3.2722514473  
H,0,-3.0815595231,4.1030144393,0.8521448485  
C,0,-1.3567403639,4.1406040259,2.150544153  
H,0,-1.5453823623,3.8682102313,0.0279515651  
H,0,-1.6456544027,-1.6641379275,3.0977427995  
H,0,-2.1660607989,-1.3675796085,1.4264173146  
H,0,-0.4320580763,-1.4184733295,1.8472455457  
H,0,-0.5466349961,0.2561452976,4.4415271485  
H,0,0.6080118874,0.5526646624,3.1414951578  
H,0,-0.4337475636,1.8786017215,3.7188916298  
H,0,-4.4286725417,0.8333499854,4.1417741184  
H,0,-3.607085444,-0.7425840366,4.0548057772  
H,0,-2.8795547314,0.5970254672,4.98686353  
C,0,0.0303935549,4.3369853769,2.1020362303  
C,0,0.7253664371,4.8073959532,3.2178540243  
C,0,0.0386138604,5.0888197247,4.4001441895  
C,0,-1.3452948721,4.9065512654,4.456722201  
C,0,-2.0395494408,4.4391921864,3.3398866693  
H,0,0.5701035555,4.1379491322,1.1782047723  
H,0,1.7987086137,4.965718826,3.1598272792  
H,0,0.5754901532,5.4627628423,5.2671486731  
H,0,-1.8886052343,5.142690553,5.3673034089  
H,0,-3.1180307211,4.3143705045,3.3857077449

p.73

```
%nproc=8  
%mem=4gb  
%chk=g09.chk  
#p B3LYP/6-31G* opt fchk NOSYMM  
scf=tight integral(grid=ultrafine)
```

product from MacMillan Diels-Alder phenyl

1 1

C,0,3.7748530952,-0.6214694319,-0.3931442934  
C,0,3.2627974771,-1.8511038795,-1.1183403821  
H,0,4.524787828,-0.0263490212,-0.9163017745  
C,0,4.1689589188,-1.2399338475,0.9652109956  
H,0,3.2945708895,-1.9958423195,-2.1920761065  
C,0,2.8229704896,-1.9722951354,1.1390539254  
C,0,2.6962853004,-2.6576017174,-0.2063701696  
H,0,2.6823635733,-2.5987405293,2.0222847894  
H,0,2.15571235,-3.5822801621,-0.376883685  
C,0,1.7778692492,-0.7344344053,1.0410071621  
C,0,2.5293385902,0.2519057683,0.0578485322  
C,0,1.5802082212,-0.1599949454,2.3812703371  
H,0,2.9428186246,1.0815579192,0.6448816174  
C,0,1.6904397936,0.8618322345,-1.0468393101  
H,0,0.8355946219,-1.0817753427,0.6220630704  
N,0,0.4918348484,-0.1461305197,3.0814571499  
H,0,2.4613501809,0.2343257491,2.8842272442  
C,0,-0.8375672207,-0.6416404,2.6408818014  
C,0,0.4778148984,0.2969399054,4.5458324669  
C,0,-1.6251926613,-0.6827710074,3.9480821732  
H,0,-0.7198307185,-1.6621795866,2.2634757256  
C,0,-1.5658319516,0.2169431366,1.5689535511  
N,0,-0.8587541352,-0.1397781014,4.939239277  
C,0,1.5585721763,-0.4612899958,5.3312703096  
C,0,0.6592732201,1.8170830251,4.6420007416  
C,0,-1.3796825475,0.0356681047,6.2901104471  
O,0,-2.7599569811,-1.1065950387,4.0462693145  
H,0,4.3954111941,-0.4974243756,1.7411017187  
H,0,5.0038971777,-1.9407517149,0.8891162298  
C,0,1.8721578837,2.218054847,-1.3590097961  
C,0,1.1600196682,2.8200982108,-2.3972116397  
C,0,0.2449915148,2.0741732934,-3.1411042913  
C,0,0.0528429713,0.7243416685,-2.8422435838  
C,0,0.7691394736,0.1225144305,-1.806223913  
H,0,2.5865206898,2.8081996473,-0.7883227835  
H,0,1.3205196069,3.8704117379,-2.6227277062  
H,0,-0.3135127744,2.5399987579,-3.9474468466  
H,0,-0.6540263036,0.1345091795,-3.4187770852  
H,0,0.6188108878,-0.934753163,-1.6081097221  
H,0,-2.5217696824,-0.3006317686,1.4278357218  
C,0,-1.7973727672,1.6704669131,1.9270145701  
H,0,-1.0201507084,0.1463226451,0.623030282

H,0,1.4609399302,-0.2267619775,6.3945218594  
 H,0,1.4500005155,-1.542530111,5.2052897646  
 H,0,2.5667822028,-0.1586504024,5.033571687  
 H,0,0.6134063461,2.1221024321,5.6914082573  
 H,0,1.6418338336,2.1135382368,4.2602792515  
 H,0,-0.1158855189,2.345022882,4.0839111729  
 H,0,-2.3970193341,-0.3578263985,6.2864710472  
 H,0,-0.7858213146,-0.5202774342,7.0219161147  
 H,0,-1.4052695938,1.0940147268,6.5675688543  
 C,0,-2.8455270748,2.0444952463,2.7831871532  
 C,0,-3.0462828917,3.3855999044,3.1122805524  
 C,0,-2.2099792863,4.3727926506,2.5850735861  
 C,0,-1.1772389607,4.0125853347,1.7179574507  
 C,0,-0.9738886587,2.6702488379,1.3903437883  
 H,0,-3.5120836651,1.2851984375,3.1827403972  
 H,0,-3.8669705341,3.6608344943,3.768641986  
 H,0,-2.374217492,5.4170838961,2.8346009181  
 H,0,-0.5377030877,4.7764887107,1.2845180812  
 H,0,-0.1851693785,2.4030607681,0.6908750126

p.75

```

%nproc=8
%mem=4gb
%chk=g09.chk
#p B3LYP/6-31G* opt=(ts,calcfc,noeigentest) fchk NOSYMM
scf=tight integral(grid=ultrafine)
  
```

ts for MacMillan Diels-Alder phenyl full exo

1 1

C,0,3.3130182665,-0.3020391629,-0.1878881601  
 C,0,2.7867002209,-1.5262546654,-0.6836548044  
 H,0,4.2107885258,0.1181386902,-0.6340725628  
 C,0,3.1755429771,-0.4009300381,1.3270601076  
 H,0,2.9086020053,-1.8815595294,-1.7008203996  
 C,0,2.0854873421,-1.4122072248,1.4673889727  
 C,0,1.9814188381,-2.1388104757,0.2971253068  
 H,0,1.5585810571,-1.6202401507,2.3922011747  
 H,0,1.3613575653,-3.0149934572,0.1457338028  
 C,0,0.7968724772,0.7702697425,0.0312671039  
 C,0,2.039014933,1.0433167118,-0.647150594  
 C,0,0.4360862963,1.4538075449,1.183489942  
 H,0,2.5928001216,1.8654391423,-0.1893320035  
 C,0,2.0774355803,1.1403738394,-2.142385719  
 H,0,0.0773193159,0.1118173907,-0.4383305431



N,0,-0.7369120152,1.4142770931,1.8151226342  
H,0,1.1658925878,2.1265789767,1.6287102169  
C,0,-1.8802158787,0.5919488212,1.4046976612  
C,0,-0.9658371548,2.1224678525,3.1219684613  
C,0,-2.826998275,0.7184406779,2.5967057167  
H,0,-1.5603090645,-0.4558610178,1.3183431198  
C,0,-2.5990077404,0.9957160569,0.0860575586  
N,0,-2.2686562444,1.5744826653,3.5009294189  
C,0,0.1075661061,1.7272877695,4.1508533713  
C,0,-1.0159605225,3.6445185668,2.9186136994  
C,0,-2.9717735252,1.9620278276,4.7152300468  
O,0,-3.9051673062,0.159440402,2.6855563586  
H,0,3.0224918681,0.5342389514,1.8683207795  
H,0,4.1078003505,-0.8452812934,1.7142747101  
C,0,2.9503724401,2.0674224382,-2.7312872416  
C,0,3.0151266867,2.2078626868,-4.1180037255  
C,0,2.2098200589,1.4171866901,-4.9373254795  
C,0,1.3392836564,0.4863367519,-4.3623098415  
C,0,1.2741245682,0.3478231816,-2.9775740085  
H,0,3.5791650908,2.6913386803,-2.0995422727  
H,0,3.6931653378,2.9349886909,-4.5547431  
H,0,2.2578744996,1.5229848783,-6.0168844004  
H,0,0.7077495872,-0.1306356538,-4.9948101019  
H,0,0.5911844682,-0.383805956,-2.553304949  
H,0,-3.4754973725,0.3394481346,0.0426176311  
C,0,-3.0144896001,2.4478184127,-0.0075855202  
H,0,-1.9645924439,0.7368745322,-0.7668785805  
H,0,-0.1304213259,2.165227356,5.1242058795  
H,0,0.1541948721,0.6398100346,4.2631826852  
H,0,1.0948370705,2.104629898,3.8666377663  
H,0,-1.207920195,4.1458375554,3.8720566946  
H,0,-0.0554865602,4.0140651886,2.5442908797  
H,0,-1.7990231934,3.9157302547,2.2076712327  
H,0,-3.9137175478,1.411681137,4.7220667376  
H,0,-2.3986249503,1.6989374409,5.6100115559  
H,0,-3.1844930345,3.0359117735,4.7244991203  
C,0,-2.2198704113,3.3703092196,-0.7022899998  
C,0,-2.5901316811,4.7139334592,-0.7841368307  
C,0,-3.7645740308,5.1534088651,-0.1705861628  
C,0,-4.5692271144,4.2410850447,0.5161206641  
C,0,-4.199547164,2.8975253604,0.5949090604  
H,0,-1.3112322585,3.0319889577,-1.1962520959  
H,0,-1.9679764915,5.4139180311,-1.3351250707  
H,0,-4.0586532561,6.1968508512,-0.2390330544  
H,0,-5.4940465951,4.5724683704,0.9800425689  
H,0,-4.8364958184,2.1901730269,1.1192425817

**RRKM Sample Input File**

Simple awk scripts were used to generate the hundreds of RRKM input files used in this work, including the example below.

```
dapt10
run on pt 10 s= -0.333 macmillian dielsalder phenyl exo full
from polyrate frequencies b3lyp/6-31g* calcs
19,0.1,300,
0,
-1,0,1,298,
0,
-1,
-1,
1.0
177,0
14.8754,16.5583,21.1123,22.5714,34.3062,41.9799,43.7295
47.5948,53.1679,61.1288,67.1768,68.8582,70.6149,106.4053
111.2375,121.5096,155.5549,170.1545,185.5917,198.0251,217.3203
221.4924,253.9969,270.7334,280.7489,306.6553,332.1782,354.6935
363.2389,364.7175,373.7847,379.4320,401.6893,409.2540,420.6435
452.7855,488.7365,495.7100,513.4032,526.0209,551.6511,562.2371
584.8953,607.9175,622.6353,628.2837,636.6359,649.6340,684.5251
689.3031,697.4594,719.9825,727.2585,760.8800,772.2429,780.4511
809.4499,813.3764,815.3061,844.6500,850.7130,871.7100,884.0497
893.3195,919.2069,926.6159,934.9138,940.3829,945.1099,952.4235
953.8428,958.2967,960.3438,974.4850,981.2243,983.2186,983.5009
993.6633,1012.2418,1014.4024,1016.7713,1019.5128,1021.4125,1023.4728
1030.2939,1053.5208,1059.5363,1062.6248,1067.2679,1117.0829,1121.4867
1122.8607,1134.7823,1140.0631,1142.5004,1161.8172,1175.0561,1197.1812
1203.1679,1208.2792,1214.7795,1219.5007,1219.9576,1221.8848,1233.5116
1243.6078,1279.8219,1284.2138,1286.8713,1318.0518,1322.7090,1332.3488
1340.2829,1355.7057,1365.1470,1378.2124,1381.8610,1387.0985,1398.1270
1416.9222,1427.2858,1432.6841,1442.8771,1446.4500,1459.6428,1473.6125
1500.1737,1501.4190,1505.1545,1508.6865,1513.2342,1523.7549,1531.4612
1536.7315,1540.8290,1541.7734,1547.0235,1562.2111,1620.8994,1640.2101
1642.2255,1647.2778,1649.0292,1663.1743,1674.9400,1826.8485,3033.0534
3056.6608,3066.6691,3069.3334,3071.5954,3076.4008,3079.7393,3120.3539
3130.1312,3140.6437,3149.1263,3152.9716,3155.0661,3171.7506,3173.8948
3176.7422,3180.0931,3193.3986,3199.5997,3200.1406,3203.9791,3208.2384
3210.8231,3211.4170,3218.0777,3221.3598,3222.3636,3228.2588,3238.4037
3238.9669,3245.2529
3978.9,3978.9,6052.2
0,
19.35
```

176,0

3257.4900,3247.9700,3246.5000,3236.0900,3224.0900,3218.9800,3216.7700  
 3213.1200,3206.8800,3204.7400,3198.9000,3191.8000,3189.6500,3186.3700  
 3180.2800,3178.4000,3174.1400,3173.4800,3151.4600,3142.2300,3140.9000  
 3137.5600,3135.4100,3126.1500,3119.5300,3077.4300,3073.5400,3067.3400  
 3064.3300,3042.6800,3020.9600,1822.8800,1663.7300,1658.0700,1646.8800  
 1642.2700,1639.3300,1560.5900,1549.2400,1547.2200,1542.4200,1537.3100  
 1532.5200,1530.4800,1522.5800,1512.1100,1509.9300,1504.5100,1500.9300  
 1493.8100,1473.4700,1472.4400,1457.5900,1450.2200,1440.6700,1437.4500  
 1430.5900,1417.7400,1399.7700,1380.3700,1373.5000,1369.6400,1362.5500  
 1340.3800,1336.5900,1336.2800,1307.1500,1301.5500,1288.3900,1284.8100  
 1275.0600,1233.7600,1225.0300,1219.2900,1218.9900,1217.4100,1213.0900  
 1206.7000,1199.9100,1196.6300,1175.6600,1162.3100,1153.9200,1144.8800  
 1135.1400,1118.0000,1117.5800,1115.0800,1103.6000,1084.9600,1082.9400  
 1059.9100,1058.0600,1022.6600,1019.2500,1017.0700,1016.6600,1012.9000  
 1010.9200,1008.4500,991.0600,985.1500,983.1200,977.4600,975.8900  
 964.6600,960.8900,951.5100,946.2700,935.6500,934.9400,917.9200  
 906.5300,885.1400,883.3500,872.6900,858.2700,845.6700,843.5300  
 824.4200,816.7300,808.0700,779.5900,772.5400,761.1100,720.6800  
 719.4900,707.6300,684.1100,648.8500,636.8200,633.3200,625.5200  
 608.4800,586.4500,565.6000,557.1100,532.9000,521.2000,506.0000  
 496.7700,451.3400,436.2300,420.3400,411.9100,397.7600,396.1700  
 374.2100,365.9100,350.7500,345.6900,326.7600,307.3100,267.6600  
 262.5300,249.1300,221.4500,216.4900,211.8300,184.3700,177.4500  
 165.5000,147.7100,123.7900,112.4800,107.5600,88.3300,69.4100  
 60.9900,58.5100,53.8700,50.6400,44.5700,37.6400,20.4200  
 16.7300  
 3380.30,3380.30,5738.95  
 0,

## References, and Complete Reference 17b:

S1. Gaussian 09, Revision A.02, Frisch, M. J.; Trucks, G. W.; Schlegel, H. B.; Scuseria, G. E.; Robb, M. A.; Cheeseman, J. R.; Scalmani, G.; Barone, V.; Mennucci, B.; Petersson, G. A.; Nakatsuji, H.; Caricato, M.; Li, X.; Hratchian, H. P.; Izmaylov, A. F.; Bloino, J.; Zheng, G.; Sonnenberg, J. L.; Hada, M.; Ehara, M.; Toyota, K.; Fukuda, R.; Hasegawa, J.; Ishida, M.; Nakajima, T.; Honda, Y.; Kitao, O.; Nakai, H.; Vreven, T.; Montgomery, Jr., J. A.; Peralta, J. E.; Ogliaro, F.; Bearpark, M.; Heyd, J. J.; Brothers, E.; Kudin, K. N.; Staroverov, V. N.; Kobayashi, R.; Normand, J.; Raghavachari, K.; Rendell, A.; Burant, J. C.; Iyengar, S. S.; Tomasi, J.; Cossi, M.; Rega, N.; Millam, N. J.; Klene, M.; Knox, J. E.; Cross, J. B.; Bakken, V.; Adamo, C.; Jaramillo, J.; Gomperts, R.; Stratmann, R. E.; Yazyev, O.; Austin, A. J.; Cammi, R.; Pomelli, C.; Ochterski, J. W.; Martin, R. L.; Morokuma, K.; Zakrzewski, V. G.; Voth, G. A.; Salvador, P.; Dannenberg, J. J.; Dapprich, S.; Daniels, A. D.; Farkas, Ö.; Foresman, J. B.; Ortiz, J. V.;

- Cioslowski, J.; Fox, D. J. Gaussian, Inc., Wallingford CT, 2009.
- S2. Singleton, D. A.; Hang, C.; Szymanski, M. J.; Greenwald, E. E. *J. Am. Chem. Soc.* **2003**, *125*, 1176-1177.
- S3. Zhu, L. Hase, W. L. A General RRKM Program. *Quantum Chemistry Program Exchange*, Indiana University: Bloomington, IN, 1994, Program No. QCPE 644.
- S4. Beyer, T. Swinehart, D. F. *Commun. Assoc. Comput. Machin.* **16**, 379 (1973).
- S5. Reference 17b: J. Zheng, S. Zhang, B. J. Lynch, J. C. Corchado, Y.-Y. Chuang, P. L. Fast, W.-P. Hu, Y.-P. Liu, G. C. Lynch, K. A. Nguyen, C. F. Jackels, A. Fernandez Ramos, B. A. Ellingson, V. S. Melissas, J. Villà, I. Rossi, E. L. Coitiño, J. Pu, T. V. Albu, R. Steckler, B. C. Garrett, A. D. Isaacson, and D. G. Truhlar, POLYRATE-version 2010, University of Minnesota, Minneapolis, 2010.
- S6. Bigeleisen, J.; Mayer, M. G. *J. Chem. Phys.* **1947**, *15*, 261-267. Wolfsberg, M. *Acc. Chem. Res.* **1972**, *5*, 225-233. Bigeleisen, J. *J. Chem. Phys.* **1949**, *17*, 675-678.
- S7. Bell, R. P. *The Tunnel Effect in Chemistry*; Chapman & Hall: London, 1980; pp 60-63.
- S8. (a) Meyer, M. P.; DelMonte, A. J.; Singleton, D. A. *J. Am. Chem. Soc.* **1999**, *121*, 10865-10874. (b) DelMonte, A. J.; Haller, J.; Houk, K. N.; Sharpless, K. B.; Singleton, D. A.; Strassner, T.; Thomas, A. A. *J. Am. Chem. Soc.* **1997**, *119*, 9907-9908. (c) Singleton, D. A.; Merrigan, S. R.; Liu, J.; Houk, K. N. *J. Am. Chem. Soc.* **1997**, *119*, 3385-3386. (d) Beno, B. R.; Houk, K. N.; Singleton, D. A. *J. Am. Chem. Soc.* **1996**, *118*, 9984-9985.
- S9. Chapman, S.; Bunker, D.L. *J. Chem. Phys.* **1975**, *62*, 2890-2899.
- S10. L. M. M. Quijano and D. A. Singleton, *J. Am. Chem. Soc.* **2011**, *133*, 13824-13827.
